# Supplementary material for: Diversity of Staphylococcus aureus Isolates in European Wildlife
Source: PubMed Central journal article supplement (PMC5161505; doi:10.1371/journal.pone.0168433), 2016-12-16
Supplement: pone.0168433.s001.pdf [file pone.0168433.s001.pdf]

| TYPING DATA |                           |                               |       |                      |          |                                     |                         |      |                 | SPECIES MARKER  |                                                               |          |                        |      |      |     |      |     |     | REGULATORY GENES |      |      |              |               |                |               |      |
|-------------|---------------------------|-------------------------------|-------|----------------------|----------|-------------------------------------|-------------------------|------|-----------------|-----------------|---------------------------------------------------------------|----------|------------------------|------|------|-----|------|-----|-----|------------------|------|------|--------------|---------------|----------------|---------------|------|
| ISOLATE ID  | CLONAL COMPLEX (by array) | STRAIN AFFILIATION (by array) | ST    | MLST Profile         | spa type | spa profile                         | Country                 | Year | Species         | Sample type     | Diagnosis/Cause of death                                      | Genotype | Droverin 1 of 235 RFLP | gpaA | katA | CoA | nuc1 | spa | sbi | sarA             | saeS | vraS | agrI (total) | agrII (total) | agrIII (total) | agrIV (total) | hlyD |
|             |                           |                               |       |                      |          |                                     |                         |      |                 |                 |                                                               |          |                        |      |      |     |      |     |     |                  |      |      |              |               |                |               |      |
| 203228      | CC0091                    | CC1-MSSA                      | N/A   | N/A                  | N/A      | N/A                                 | Germany (NRW)           | 2013 | Fallow deer     | Nasal swab      | Trauma (catch damage)                                         | POS      | POS                    | POS  | POS  | POS | POS  | POS | POS | POS              | POS  | POS  | POS          | POS           | POS            | POS           | POS  |
| 203229      | CC0091                    | CC1-MSSA                      | N/A   | N/A                  | N/A      | N/A                                 | Germany (NRW)           | 2013 | Fallow deer     | Nasal swab      | Found dead, lung and intestinal parasitosis                   | POS      | POS                    | POS  | POS  | POS | POS  | POS | POS | POS              | POS  | POS  | POS          | POS           | POS            | POS           | POS  |
| 203233      | CC0091                    | CC1-MSSA                      | N/A   | N/A                  | N/A      | N/A                                 | Germany (NRW)           | 2013 | Fallow deer     | Nasal swab      | Laminitis, Trauma (chb)                                       | POS      | POS                    | POS  | POS  | POS | POS  | POS | POS | POS              | POS  | POS  | POS          | POS           | POS            | POS           | POS  |
| 220334      | CC0091                    | CC1-MSSA                      | N/A   | N/A                  | N/A      | N/A                                 | Germany                 | 2013 | Mouflon         | Nasal swab      | Oxna progressive adenocarcinoma                               | POS      | POS                    | POS  | POS  | POS | POS  | POS | POS | POS              | POS  | POS  | POS          | POS           | POS            | POS           | POS  |
| 223621      | CC0091                    | CC1-MSSA                      | N/A   | N/A                  | N/A      | N/A                                 | Germany                 | 2013 | Red fox         | Nasal swab      | Trauma (chb)                                                  | POS      | POS                    | POS  | POS  | POS | POS  | POS | POS | POS              | POS  | POS  | POS          | POS           | POS            | POS           | POS  |
| 289123      | CC0091                    | CC1-MSSA                      | ST122 | 7-6-1-5-8-8-6        | N/A      | N/A                                 | Austria                 | 2013 | Red fox         | Faecal sample   | Chronic enteritis                                             | POS      | POS                    | POS  | POS  | POS | POS  | POS | POS | POS              | POS  | POS  | POS          | POS           | POS            | POS           | POS  |
| 289124      | CC0091                    | CC1-MSSA                      | ST11  | 4-4-1-4-1-1-1        | N/A      | N/A                                 | Austria                 | 2013 | Red fox         | Faecal sample   | N/A                                                           | POS      | POS                    | POS  | POS  | POS | POS  | POS | POS | POS              | POS  | POS  | POS          | POS           | POS            | POS           | POS  |
| 275170      | CC0095                    | CC5-MSSA                      | N/A   | N/A                  | N/A      | N/A                                 | Germany (Peltorum)      | 2012 | Brown hare      | Tissue sample   | Trauma (chb)                                                  | POS      | POS                    | POS  | POS  | POS | POS  | POS | POS | POS              | POS  | POS  | POS          | POS           | POS            | POS           | POS  |
| 275171      | CC0095                    | CC5-MSSA                      | N/A   | N/A                  | N/A      | N/A                                 | Germany (Peltorum)      | 2012 | Brown hare      | Lungs sample    | Trauma (chb)                                                  | POS      | POS                    | POS  | POS  | POS | POS  | POS | POS | POS              | POS  | POS  | POS          | POS           | POS            | POS           | POS  |
| 112747      | CC0095                    | CC5-MSSA                      | N/A   | N/A                  | N/A      | N/A                                 | Sweden                  | 2007 | Grey partridge  | Lung tissue     | Purulent pneumonia, aerocolitis, peritonitis                  | POS      | POS                    | POS  | POS  | POS | POS  | POS | POS | POS              | POS  | POS  | POS          | POS           | POS            | POS           | POS  |
| 112752      | CC0095                    | CC5-MSSA                      | N/A   | N/A                  | N/A      | N/A                                 | Sweden                  | 2006 | Red fox         | Muscle tissue   | Skin lesion, phlegmon, sepsis                                 | POS      | POS                    | POS  | POS  | POS | POS  | POS | POS | POS              | POS  | POS  | POS          | POS           | POS            | POS           | POS  |
| 275178      | CC0097                    | CC7-MSSA                      | N/A   | N/A                  | N/A      | N/A                                 | Austria (Lower Austria) | 2015 | Red fox         | Nasal swab      | N/A                                                           | POS      | POS                    | POS  | POS  | POS | POS  | POS | POS | POS              | POS  | POS  | POS          | POS           | POS            | POS           | POS  |
| 275186      | CC0098                    | CC8-MSSA                      | N/A   | N/A                  | N/A      | N/A                                 | Austria (Carinthia)     | 2012 | Marmot          | Faecal sample   | N/A                                                           | POS      | POS                    | POS  | POS  | POS | POS  | POS | POS | POS              | POS  | POS  | POS          | POS           | POS            | POS           | POS  |
| 275176      | CC0098                    | CC8-MSSA                      | N/A   | N/A                  | N/A      | N/A                                 | Austria (Salzburg)      | 2015 | Mouflon         | Nasal swab      | Enteritis                                                     | POS      | POS                    | POS  | POS  | POS | POS  | POS | POS | POS              | POS  | POS  | POS          | POS           | POS            | POS           | POS  |
| 275177      | CC0098                    | CC8-MSSA                      | N/A   | N/A                  | N/A      | N/A                                 | Austria (Lower Austria) | 2015 | Mouflon         | Nasal swab      | N/A                                                           | POS      | POS                    | POS  | POS  | POS | POS  | POS | POS | POS              | POS  | POS  | POS          | POS           | POS            | POS           | POS  |
| 275187      | CC0098                    | CC8-MSSA                      | N/A   | N/A                  | N/A      | N/A                                 | Austria (Burgenland)    | 2015 | Wild boar       | Skin swab       | N/A                                                           | POS      | POS                    | POS  | POS  | POS | POS  | POS | POS | POS              | POS  | POS  | POS          | POS           | POS            | POS           | POS  |
| 170968      | CC0012                    | CC12-MSSA                     | N/A   | N/A                  | N/A      | N/A                                 | Sweden                  | 2012 | Harbor porpoise | Heart           | N/A                                                           | POS      | POS                    | POS  | POS  | POS | POS  | POS | POS | POS              | POS  | POS  | POS          | POS           | POS            | POS           | POS  |
| 275175      | CC0015                    | CC15-MSSA                     | N/A   | N/A                  | N/A      | N/A                                 | Austria (Lower Austria) | 2010 | Rook            | Faecal sample   | N/A                                                           | POS      | POS                    | POS  | POS  | POS | POS  | POS | POS | POS              | POS  | POS  | POS          | POS           | POS            | POS           | POS  |
| 170949      | CC0015                    | CC15-MSSA                     | N/A   | N/A                  | N/A      | N/A                                 | Sweden                  | 2005 | Moose           | Liver abscess   | Hepatitis                                                     | POS      | POS                    | POS  | POS  | POS | POS  | POS | POS | POS              | POS  | POS  | POS          | POS           | POS            | POS           | POS  |
| 228958      | CC0022                    | CC22-MSSA                     | N/A   | N/A                  | N/A      | N/A                                 | Germany                 | 2014 | Red fox         | Nasal swab      | N/A                                                           | POS      | POS                    | POS  | POS  | POS | POS  | POS | POS | POS              | POS  | POS  | POS          | POS           | POS            | POS           | POS  |
| 289125      | CC0022                    | CC22-MSSA                     | ST22  | 7-6-1-5-8-8-6        | N/A      | N/A                                 | Austria                 | 2013 | Rook            | Faecal sample   | N/A                                                           | POS      | POS                    | POS  | POS  | POS | POS  | POS | POS | POS              | POS  | POS  | POS          | POS           | POS            | POS           | POS  |
| 289126      | CC0022                    | CC22-MSSA                     | ST22  | 7-6-1-5-8-8-6        | N/A      | N/A                                 | Austria                 | 2013 | Rook            | Faecal sample   | N/A                                                           | POS      | POS                    | POS  | POS  | POS | POS  | POS | POS | POS              | POS  | POS  | POS          | POS           | POS            | POS           | POS  |
| 289127      | CC0022                    | CC22-MSSA                     | ST22  | 7-6-1-5-8-8-6        | N/A      | N/A                                 | Austria                 | 2013 | Rook            | Faecal sample   | N/A                                                           | POS      | POS                    | POS  | POS  | POS | POS  | POS | POS | POS              | POS  | POS  | POS          | POS           | POS            | POS           | POS  |
| 131839      | CC0025                    | CC25-MSSA                     | N/A   | N/A                  | N/A      | N/A                                 | Germany                 | 2011 | Badger          | Pharyngeal swab | Trauma (roadkill)                                             | POS      | POS                    | POS  | POS  | POS | POS  | POS | POS | POS              | POS  | POS  | POS          | POS           | POS            | POS           | POS  |
| 275185      | CC0030                    | CC30-MSSA (huK-P-PS3huM)      | N/A   | N/A                  | N/A      | N/A                                 | Austria                 | 2012 | Marmot          | Intestine       | N/A                                                           | POS      | POS                    | POS  | POS  | POS | POS  | POS | POS | POS              | POS  | POS  | POS          | POS           | POS            | POS           | POS  |
| 275184      | CC0030                    | CC30-MSSA                     | N/A   | N/A                  | N/A      | N/A                                 | Austria                 | 2015 | Red deer        | Nasal swab      | N/A                                                           | POS      | POS                    | POS  | POS  | POS | POS  | POS | POS | POS              | POS  | POS  | POS          | POS           | POS            | POS           | POS  |
| 124292      | CC0049                    | CC49-MSSA (huK-P-PS3huM)      | CC49  | 14-16-11-13-13-12-2  | 1298     | 04-20-17-17-31-31-24-17-17-17-17-25 | Germany (BY)            | 2010 | Bank vole       | Faecal sample   | N/A                                                           | POS      | POS                    | POS  | POS  | POS | POS  | POS | POS | POS              | POS  | POS  | POS          | POS           | POS            | POS           | POS  |
| 220616      | CC0049                    | CC49-MSSA (huK-P-PS3huM)      | ST49  | 14-16-11-13-13-12-14 | 1298     | 04-20-17-17-31-31-24-17-17-17-17-25 | Germany (BY)            | 2010 | Bank vole       | Faecal sample   | N/A                                                           | POS      | POS                    | POS  | POS  | POS | POS  | POS | POS | POS              | POS  | POS  | POS          | POS           | POS            | POS           | POS  |
| CC0049      | CC0049                    | CC49-MSSA                     | N/A   | N/A                  | N/A      | N/A                                 | Germany                 | 2014 | Wild boar       | Nasal swab      | Trauma (roadkill)                                             | POS      | POS                    | POS  | POS  | POS | POS  | POS | POS | POS              | POS  | POS  | POS          | POS           | POS            | POS           | POS  |
| 180994      | CC0059                    | CC59-MSSA                     | N/A   | N/A                  | N/A      | N/A                                 | Germany (TH)            | 2012 | Wild boar       | Nasal swab      | Trauma (chb)                                                  | POS      | POS                    | POS  | POS  | POS | POS  | POS | POS | POS              | POS  | POS  | POS          | POS           | POS            | POS           | POS  |
| 275172      | CC0088                    | CC88-MSSA                     | N/A   | N/A                  | N/A      | N/A                                 | Austria (Lower Austria) | 2013 | Rook            | Faecal sample   | N/A                                                           | POS      | POS                    | POS  | POS  | POS | POS  | POS | POS | POS              | POS  | POS  | POS          | POS           | POS            | POS           | POS  |
| 275173      | CC0088                    | CC88-MSSA                     | N/A   | N/A                  | N/A      | N/A                                 | Austria (Lower Austria) | 2013 | Rook            | Faecal sample   | N/A                                                           | POS      | POS                    | POS  | POS  | POS | POS  | POS | POS | POS              | POS  | POS  | POS          | POS           | POS            | POS           | POS  |
| 275174      | CC0088                    | CC88-MSSA                     | N/A   | N/A                  | N/A      | N/A                                 | Austria (Lower Austria) | 2013 | Rook            | Faecal sample   | N/A                                                           | POS      | POS                    | POS  | POS  | POS | POS  | POS | POS | POS              | POS  | POS  | POS          | POS           | POS            | POS           | POS  |
| 170971      | CC0097                    | CC97-MSSA                     | N/A   | N/A                  | N/A      | N/A                                 | Sweden                  | 2012 | Golden eagle    | Joint           | Emaciation, trauma                                            | POS      | POS                    | POS  | POS  | POS | POS  | POS | POS | POS              | POS  | POS  | POS          | POS           | POS            | POS           | POS  |
| 112745      | CC0097                    | CC97-MSSA                     | N/A   | N/A                  | N/A      | N/A                                 | Sweden                  | 2004 | Moose           | Ear swab        | Emaciation                                                    | POS      | POS                    | POS  | POS  | POS | POS  | POS | POS | POS              | POS  | POS  | POS          | POS           | POS            | POS           | POS  |
| 125740      | CC0097                    | CC97-MSSA                     | N/A   | N/A                  | N/A      | N/A                                 | Sweden                  | 2006 | Moose           | Ear swab        | No lesions observed                                           | POS      | POS                    | POS  | POS  | POS | POS  | POS | POS | POS              | POS  | POS  | POS          | POS           | POS            | POS           | POS  |
| 112762      | CC0097                    | CC97-MSSA                     | N/A   | N/A                  | N/A      | N/A                                 | Sweden                  | 2008 | Moose           | Lung tissue     | Purulent pneumonia                                            | POS      | POS                    | POS  | POS  | POS | POS  | POS | POS | POS              | POS  | POS  | POS          | POS           | POS            | POS           | POS  |
| 112763      | CC0097                    | CC97-MSSA                     | N/A   | N/A                  | N/A      | N/A                                 | Sweden                  | 2008 | Moose           | Skin swab       | Ulcerative dermatitis                                         | POS      | POS                    | POS  | POS  | POS | POS  | POS | POS | POS              | POS  | POS  | POS          | POS           | POS            | POS           | POS  |
| 112764      | CC0097                    | CC97-MSSA                     | N/A   | N/A                  | N/A      | N/A                                 | Sweden                  | 2009 | Moose           | Lung tissue     | Parasitic pneumonia, non-purulent meningoencephalitis         | POS      | POS                    | POS  | POS  | POS | POS  | POS | POS | POS              | POS  | POS  | POS          | POS           | POS            | POS           | POS  |
| 170945      | CC0097                    | CC97-MSSA                     | N/A   | N/A                  | N/A      | N/A                                 | Sweden                  | 2010 | Moose           | Liver tissue    | Sepsis                                                        | POS      | POS                    | POS  | POS  | POS | POS  | POS | POS | POS              | POS  | POS  | POS          | POS           | POS            | POS           | POS  |
| 170954      | CC0097                    | CC97-MSSA                     | N/A   | N/A                  | N/A      | N/A                                 | Sweden                  | 2010 | Moose           | Heart           | Parasitic, peritonitis                                        | POS      | POS                    | POS  | POS  | POS | POS  | POS | POS | POS              | POS  | POS  | POS          | POS           | POS            | POS           | POS  |
| 170956      | CC0097                    | CC97-MSSA                     | N/A   | N/A                  | N/A      | N/A                                 | Sweden                  | 2011 | Moose           | Skin            | Chronic dermatitis                                            | POS      | POS                    | POS  | POS  | POS | POS  | POS | POS | POS              | POS  | POS  | POS          | POS           | POS            | POS           | POS  |
| 170963      | CC0097                    | CC97-MSSA                     | N/A   | N/A                  | N/A      | N/A                                 | Sweden                  | 2011 | Moose           | Skin            | Chronic dermatitis                                            | POS      | POS                    | POS  | POS  | POS | POS  | POS | POS | POS              | POS  | POS  | POS          | POS           | POS            | POS           | POS  |
| 170964      | CC0097                    | CC97-MSSA                     | N/A   | N/A                  | N/A      | N/A                                 | Sweden                  | 2011 | Moose           | Skin            | Parasitic colitis with secondary bacterial infection          | POS      | POS                    | POS  | POS  | POS | POS  | POS | POS | POS              | POS  | POS  | POS          | POS           | POS            | POS           | POS  |
| 170965      | CC0097                    | CC97-MSSA                     | N/A   | N/A                  | N/A      | N/A                                 | Sweden                  | 2011 | Moose           | Skin            | Parasitic dermatitis                                          | POS      | POS                    | POS  | POS  | POS | POS  | POS | POS | POS              | POS  | POS  | POS          | POS           | POS            | POS           | POS  |
| 170966      | CC0097                    | CC97-MSSA                     | N/A   | N/A                  | N/A      | N/A                                 | Sweden                  | 2011 | Moose           | Skin            | Chronic dermatitis                                            | POS      | POS                    | POS  | POS  | POS | POS  | POS | POS | POS              | POS  | POS  | POS          | POS           | POS            | POS           | POS  |
| 170974      | CC0097                    | CC97-MSSA                     | N/A   | N/A                  | N/A      | N/A                                 | Sweden                  | 2012 | Moose           | Skin            | Otitis externa, parasitic otitis                              | POS      | POS                    | POS  | POS  | POS | POS  | POS | POS | POS              | POS  | POS  | POS          | POS           | POS            | POS           | POS  |
| 170976      | CC0097                    | CC97-MSSA                     | N/A   | N/A                  | N/A      | N/A                                 | Sweden                  | 2012 | Moose           | Skin            | Hypogammaglobulinemic pericardial abscess, purulent enteritis | POS      | POS                    | POS  | POS  | POS | POS  | POS | POS | POS              | POS  | POS  | POS          | POS           | POS            | POS           | POS  |
| 170977      | CC0097                    | CC97-MSSA                     | N/A   | N/A                  | N/A      | N/A                                 | Sweden                  | 2012 | Moose           | Skin            | Chronic dermatitis                                            | POS      | POS                    | POS  | POS  | POS | POS  | POS | POS | POS              | POS  | POS  | POS          | POS           | POS            | POS           | POS  |
| 125744      | CC0097                    | CC97-MSSA                     | N/A   | N/A                  | N/A      | N/A                                 | Sweden                  | 2004 | Roos deer       | Lung tissue     | Pneumonia                                                     | POS      | POS                    | POS  | POS  | POS | POS  | POS | POS | POS              | POS  | POS  | POS          | POS           | POS            | POS           | POS  |
| 112748      | CC0097                    | CC97-MSSA                     | N/A   | N/A                  | N/A      | N/A                                 | Sweden                  | 2006 | Roos deer       | Abscess         | Abscess                                                       | POS      | POS                    | POS  | POS  | POS | POS  | POS | POS | POS              | POS  | POS  | POS          | POS           | POS            | POS           | POS  |
| 112757      | CC0097                    | CC97-MSSA</                   |       |                      |          |                                     |                         |      |                 |                 |                                                               |          |                        |      |      |     |      |     |     |                  |      |      |              |               |                |               |      |

| ISOLATE ID | CLONAL COMPLEX (by array) | STRAIN AFFILIATION (by array) | METHICILLIN RESISTANCE AND SCCmec TYPING |            |              |           |        |              |           |          |          |          |          |          |          |          |        |      |        |                          |                          |                |                          |                          |                |               |        |      |               |  | METHICILLIN RESISTANCE AND SCCmec TYPING |  |      |  |      |  |      |  |      |  |      |  |      |  |      |  |      |  |      |  |      |  |      |  |      |  |       |  |       |  |       |  |       |  |       |  |       |  |       |  |       |  |       |  |       |  |       |  |       |  |       |  |       |  |       |  |       |  |       |  |       |  |       |  |       |  |       |  |       |  |       |  |       |  |       |  |       |  |       |  |       |  |       |  |       |  |       |  |       |  |       |  |       |  |       |  |       |  |       |  |       |  |       |  |       |  |       |  |       |  |       |  |       |  |       |  |       |  |       |  |       |  |       |  |       |  |       |  |       |  |       |  |       |  |       |  |       |  |       |  |       |  |       |  |       |  |       |  |       |  |       |  |       |  |       |  |       |  |       |  |       |  |       |  |       |  |       |  |       |  |       |  |       |  |       |  |       |  |       |  |       |  |       |  |       |  |       |  |       |  |       |  |       |  |       |  |       |  |       |  |       |  |       |  |       |  |       |  |       |  |       |  |       |  |       |  |       |  |       |  |       |  |       |  |       |  |       |  |       |  |       |  |       |  |       |  |       |  |       |  |       |  |       |  |       |  |       |  |       |  |       |  |       |  |       |  |       |  |       |  |       |  |       |  |       |  |       |  |       |  |       |  |       |  |       |  |       |  |       |  |       |  |       |  |       |  |       |  |       |  |       |  |       |  |       |  |       |  |       |  |       |  |       |  |       |  |       |  |       |  |       |  |       |  |       |  |       |  |       |  |       |  |       |  |       |  |       |  |       |  |       |  |       |  |       |  |       |  |       |  |       |  |       |  |       |  |       |  |       |  |       |  |       |  |       |  |       |  |       |  |       |  |       |  |       |  |       |  |       |  |       |  |       |  |       |  |       |  |       |  |       |  |       |  |       |  |       |  |       |  |       |  |       |  |       |  |       |  |       |  |       |  |       |  |       |  |       |  |       |  |       |  |       |  |       |  |       |  |       |  |       |  |       |  |       |  |       |  |       |  |       |  |       |  |       |  |       |  |       |  |       |  |       |  |       |  |       |  |       |  |       |  |       |  |       |  |       |  |       |  |       |  |       |  |       |  |       |  |       |  |       |  |       |  |       |  |       |  |       |  |       |  |       |  |       |  |       |  |       |  |       |  |       |  |       |  |       |  |       |  |       |  |       |  |       |  |       |  |       |  |       |  |       |  |       |  |       |  |       |  |       |  |       |  |       |  |       |  |       |  |       |  |       |  |       |  |       |  |       |  |       |  |       |  |       |  |       |  |       |  |       |  |       |  |       |  |       |  |       |  |       |  |       |  |       |  |       |  |       |  |       |  |       |  |       |  |       |  |       |  |       |  |       |  |       |  |       |  |       |  |       |  |       |  |       |  |       |  |       |  |       |  |       |  |       |  |       |  |       |  |       |  |       |  |       |  |       |  |       |  |       |  |       |  |       |  |       |  |       |  |       |  |       |  |       |  |       |  |       |  |       |  |       |  |       |  |       |  |       |  |       |  |       |  |       |  |       |  |       |  |       |  |       |  |       |  |       |  |       |  |       |  |       |  |       |  |       |  |       |  |       |  |       |  |       |  |       |  |       |  |       |  |       |  |       |  |       |  |       |  |       |  |       |  |       |  |       |  |       |  |       |  |       |  |       |  |       |  |       |  |       |  |       |  |       |  |       |  |       |  |       |  |       |  |       |  |       |  |       |  |       |  |       |  |       |  |       |  |       |  |       |  |       |  |       |  |       |  |       |  |       |  |       |  |       |  |       |  |       |  |       |  |       |  |       |  |       |  |       |  |       |  |       |  |       |  |       |  |       |  |       |  |       |  |       |  |       |  |       |  |       |  |       |  |       |  |       |  |       |  |       |  |       |  |       |  |       |  |       |  |       |  |       |  |       |  |       |  |       |  |       |  |       |  |       |  |       |  |       |  |       |  |       |  |       |  |       |  |       |  |       |  |       |  |       |  |       |  |       |  |       |  |       |  |       |  |       |  |       |  |       |  |       |  |       |  |       |  |       |  |       |  |       |  |       |  |       |  |       |  |       |  |       |  |       |  |       |  |       |  |       |  |       |  |       |  |       |  |       |  |       |  |       |  |       |  |       |  |       |  |       |  |       |  |       |  |       |  |       |  |       |  |       |  |       |  |       |  |       |  |       |  |       |  |       |  |       |  |       |  |       |  |       |  |       |  |       |  |       |  |       |  |       |  |       |  |       |  |       |  |       |  |       |  |       |  |       |  |       |  |       |  |       |  |       |  |       |  |       |  |       |  |       |  |       |  |       |  |       |  |       |  |       |  |       |  |       |  |       |  |       |  |       |  |       |  |       |  |       |  |       |  |       |  |       |  |       |  |       |  |       |  |       |  |       |  |       |  |       |  |       |  |       |  |       |  |       |  |       |  |       |  |       |  |       |  |       |  |       |  |       |  |       |  |       |  |       |  |       |  |       |  |       |  |       |  |       |  |       |  |       |  |       |  |       |  |       |  |       |  |       |  |       |  |       |  |       |  |       |  |       |  |       |  |       |  |       |  |       |  |       |  |       |  |       |  |       |  |       |  |       |  |       |  |       |  |       |  |       |  |       |  |       |  |       |  |       |  |       |  |       |  |       |  |       |  |       |  |       |  |       |  |       |  |       |  |       |  |       |  |       |  |       |  |       |  |       |  |       |  |       |  |       |  |       |  |       |  |       |  |       |  |       |  |       |  |       |  |       |  |       |  |       |  |       |  |       |  |       |  |       |  |       |  |       |  |       |  |       |  |       |  |       |  |       |  |       |  |       |  |       |  |       |  |       |  |       |  |       |  |       |  |       |  |       |  |       |  |       |  |       |  |       |  |       |  |       |  |       |  |       |  |       |  |       |  |       |  |       |  |       |  |       |  |       |  |       |  |       |  |       |  |       |  |       |  |       |  |       |  |       |  |       |  |       |  |       |  |       |  |       |  |       |  |       |  |       |  |       |  |       |  |       |  |       |  |       |  |       |  |       |  |       |  |       |  |       |  |       |  |       |  |       |  |       |  |       |  |       |  |       |  |       |  |       |  |       |  |       |  |       |  |       |  |       |  |       |  |       |  |       |  |       |  |       |  |       |  |       |  |       |  |       |  |       |  |       |  |       |  |       |  |
|------------|---------------------------|-------------------------------|------------------------------------------|------------|--------------|-----------|--------|--------------|-----------|----------|----------|----------|----------|----------|----------|----------|--------|------|--------|--------------------------|--------------------------|----------------|--------------------------|--------------------------|----------------|---------------|--------|------|---------------|--|------------------------------------------|--|------|--|------|--|------|--|------|--|------|--|------|--|------|--|------|--|------|--|------|--|------|--|------|--|-------|--|-------|--|-------|--|-------|--|-------|--|-------|--|-------|--|-------|--|-------|--|-------|--|-------|--|-------|--|-------|--|-------|--|-------|--|-------|--|-------|--|-------|--|-------|--|-------|--|-------|--|-------|--|-------|--|-------|--|-------|--|-------|--|-------|--|-------|--|-------|--|-------|--|-------|--|-------|--|-------|--|-------|--|-------|--|-------|--|-------|--|-------|--|-------|--|-------|--|-------|--|-------|--|-------|--|-------|--|-------|--|-------|--|-------|--|-------|--|-------|--|-------|--|-------|--|-------|--|-------|--|-------|--|-------|--|-------|--|-------|--|-------|--|-------|--|-------|--|-------|--|-------|--|-------|--|-------|--|-------|--|-------|--|-------|--|-------|--|-------|--|-------|--|-------|--|-------|--|-------|--|-------|--|-------|--|-------|--|-------|--|-------|--|-------|--|-------|--|-------|--|-------|--|-------|--|-------|--|-------|--|-------|--|-------|--|-------|--|-------|--|-------|--|-------|--|-------|--|-------|--|-------|--|-------|--|-------|--|-------|--|-------|--|-------|--|-------|--|-------|--|-------|--|-------|--|-------|--|-------|--|-------|--|-------|--|-------|--|-------|--|-------|--|-------|--|-------|--|-------|--|-------|--|-------|--|-------|--|-------|--|-------|--|-------|--|-------|--|-------|--|-------|--|-------|--|-------|--|-------|--|-------|--|-------|--|-------|--|-------|--|-------|--|-------|--|-------|--|-------|--|-------|--|-------|--|-------|--|-------|--|-------|--|-------|--|-------|--|-------|--|-------|--|-------|--|-------|--|-------|--|-------|--|-------|--|-------|--|-------|--|-------|--|-------|--|-------|--|-------|--|-------|--|-------|--|-------|--|-------|--|-------|--|-------|--|-------|--|-------|--|-------|--|-------|--|-------|--|-------|--|-------|--|-------|--|-------|--|-------|--|-------|--|-------|--|-------|--|-------|--|-------|--|-------|--|-------|--|-------|--|-------|--|-------|--|-------|--|-------|--|-------|--|-------|--|-------|--|-------|--|-------|--|-------|--|-------|--|-------|--|-------|--|-------|--|-------|--|-------|--|-------|--|-------|--|-------|--|-------|--|-------|--|-------|--|-------|--|-------|--|-------|--|-------|--|-------|--|-------|--|-------|--|-------|--|-------|--|-------|--|-------|--|-------|--|-------|--|-------|--|-------|--|-------|--|-------|--|-------|--|-------|--|-------|--|-------|--|-------|--|-------|--|-------|--|-------|--|-------|--|-------|--|-------|--|-------|--|-------|--|-------|--|-------|--|-------|--|-------|--|-------|--|-------|--|-------|--|-------|--|-------|--|-------|--|-------|--|-------|--|-------|--|-------|--|-------|--|-------|--|-------|--|-------|--|-------|--|-------|--|-------|--|-------|--|-------|--|-------|--|-------|--|-------|--|-------|--|-------|--|-------|--|-------|--|-------|--|-------|--|-------|--|-------|--|-------|--|-------|--|-------|--|-------|--|-------|--|-------|--|-------|--|-------|--|-------|--|-------|--|-------|--|-------|--|-------|--|-------|--|-------|--|-------|--|-------|--|-------|--|-------|--|-------|--|-------|--|-------|--|-------|--|-------|--|-------|--|-------|--|-------|--|-------|--|-------|--|-------|--|-------|--|-------|--|-------|--|-------|--|-------|--|-------|--|-------|--|-------|--|-------|--|-------|--|-------|--|-------|--|-------|--|-------|--|-------|--|-------|--|-------|--|-------|--|-------|--|-------|--|-------|--|-------|--|-------|--|-------|--|-------|--|-------|--|-------|--|-------|--|-------|--|-------|--|-------|--|-------|--|-------|--|-------|--|-------|--|-------|--|-------|--|-------|--|-------|--|-------|--|-------|--|-------|--|-------|--|-------|--|-------|--|-------|--|-------|--|-------|--|-------|--|-------|--|-------|--|-------|--|-------|--|-------|--|-------|--|-------|--|-------|--|-------|--|-------|--|-------|--|-------|--|-------|--|-------|--|-------|--|-------|--|-------|--|-------|--|-------|--|-------|--|-------|--|-------|--|-------|--|-------|--|-------|--|-------|--|-------|--|-------|--|-------|--|-------|--|-------|--|-------|--|-------|--|-------|--|-------|--|-------|--|-------|--|-------|--|-------|--|-------|--|-------|--|-------|--|-------|--|-------|--|-------|--|-------|--|-------|--|-------|--|-------|--|-------|--|-------|--|-------|--|-------|--|-------|--|-------|--|-------|--|-------|--|-------|--|-------|--|-------|--|-------|--|-------|--|-------|--|-------|--|-------|--|-------|--|-------|--|-------|--|-------|--|-------|--|-------|--|-------|--|-------|--|-------|--|-------|--|-------|--|-------|--|-------|--|-------|--|-------|--|-------|--|-------|--|-------|--|-------|--|-------|--|-------|--|-------|--|-------|--|-------|--|-------|--|-------|--|-------|--|-------|--|-------|--|-------|--|-------|--|-------|--|-------|--|-------|--|-------|--|-------|--|-------|--|-------|--|-------|--|-------|--|-------|--|-------|--|-------|--|-------|--|-------|--|-------|--|-------|--|-------|--|-------|--|-------|--|-------|--|-------|--|-------|--|-------|--|-------|--|-------|--|-------|--|-------|--|-------|--|-------|--|-------|--|-------|--|-------|--|-------|--|-------|--|-------|--|-------|--|-------|--|-------|--|-------|--|-------|--|-------|--|-------|--|-------|--|-------|--|-------|--|-------|--|-------|--|-------|--|-------|--|-------|--|-------|--|-------|--|-------|--|-------|--|-------|--|-------|--|-------|--|-------|--|-------|--|-------|--|-------|--|-------|--|-------|--|-------|--|-------|--|-------|--|-------|--|-------|--|-------|--|-------|--|-------|--|-------|--|-------|--|-------|--|-------|--|-------|--|-------|--|-------|--|-------|--|-------|--|-------|--|-------|--|-------|--|-------|--|-------|--|-------|--|-------|--|-------|--|-------|--|-------|--|-------|--|-------|--|-------|--|-------|--|-------|--|-------|--|-------|--|-------|--|-------|--|-------|--|-------|--|-------|--|-------|--|-------|--|-------|--|-------|--|-------|--|-------|--|-------|--|-------|--|-------|--|-------|--|-------|--|-------|--|-------|--|-------|--|-------|--|-------|--|-------|--|-------|--|-------|--|-------|--|-------|--|-------|--|-------|--|-------|--|-------|--|-------|--|-------|--|-------|--|-------|--|-------|--|-------|--|-------|--|-------|--|-------|--|-------|--|-------|--|-------|--|-------|--|-------|--|-------|--|-------|--|-------|--|-------|--|-------|--|-------|--|-------|--|-------|--|-------|--|-------|--|-------|--|-------|--|-------|--|-------|--|-------|--|-------|--|-------|--|-------|--|-------|--|-------|--|-------|--|-------|--|-------|--|-------|--|-------|--|-------|--|-------|--|-------|--|-------|--|-------|--|-------|--|-------|--|-------|--|-------|--|-------|--|-------|--|-------|--|-------|--|-------|--|-------|--|-------|--|-------|--|-------|--|-------|--|-------|--|-------|--|-------|--|-------|--|-------|--|-------|--|-------|--|-------|--|-------|--|-------|--|-------|--|-------|--|-------|--|-------|--|-------|--|-------|--|-------|--|-------|--|-------|--|-------|--|-------|--|-------|--|-------|--|-------|--|-------|--|-------|--|-------|--|-------|--|-------|--|-------|--|-------|--|-------|--|-------|--|-------|--|-------|--|-------|--|-------|--|-------|--|-------|--|-------|--|-------|--|-------|--|-------|--|-------|--|-------|--|-------|--|-------|--|-------|--|-------|--|-------|--|
|            |                           |                               | abx/mecA                                 |            | mecI         |           | mecR   |              | mecC      |          | mecD     |          | mecE     |          | mecF     |          | mecG   |      | mecH   |                          | mecI                     |                | mecJ                     |                          | mecK           |               | mecL   |      | mecM          |  | mecN                                     |  | mecO |  | mecP |  | mecQ |  | mecR |  | mecS |  | mecT |  | mecU |  | mecV |  | mecW |  | mecX |  | mecY |  | mecZ |  | mecAA |  | mecAB |  | mecAC |  | mecAD |  | mecAE |  | mecAF |  | mecAG |  | mecAH |  | mecAI |  | mecAJ |  | mecAK |  | mecAL |  | mecAM |  | mecAN |  | mecAO |  | mecAP |  | mecAQ |  | mecAR |  | mecAS |  | mecAT |  | mecAU |  | mecAV |  | mecAW |  | mecAX |  | mecAY |  | mecAZ |  | mecBA |  | mecBB |  | mecBC |  | mecBD |  | mecBE |  | mecBF |  | mecBG |  | mecBH |  | mecBI |  | mecBJ |  | mecBK |  | mecBL |  | mecBM |  | mecBN |  | mecBO |  | mecBP |  | mecBQ |  | mecBR |  | mecBS |  | mecBT |  | mecBU |  | mecBV |  | mecBW |  | mecBX |  | mecBY |  | mecBZ |  | mecCA |  | mecCB |  | mecCC |  | mecCD |  | mecCE |  | mecCF |  | mecCG |  | mecCH |  | mecCI |  | mecCJ |  | mecCK |  | mecCL |  | mecCM |  | mecCN |  | mecCO |  | mecCP |  | mecCQ |  | mecCR |  | mecCS |  | mecCT |  | mecCU |  | mecCV |  | mecCW |  | mecCX |  | mecCY |  | mecCZ |  | mecDA |  | mecDB |  | mecDC |  | mecDD |  | mecDE |  | mecDF |  | mecDG |  | mecDH |  | mecDI |  | mecDJ |  | mecDK |  | mecDL |  | mecDM |  | mecDN |  | mecDO |  | mecDP |  | mecDQ |  | mecDR |  | mecDS |  | mecDT |  | mecDU |  | mecDV |  | mecDW |  | mecDX |  | mecDY |  | mecDZ |  | mecEA |  | mecEB |  | mecEC |  | mecED |  | mecEE |  | mecEF |  | mecEG |  | mecEH |  | mecEI |  | mecEJ |  | mecEK |  | mecEL |  | mecEM |  | mecEN |  | mecEO |  | mecEP |  | mecEQ |  | mecER |  | mecES |  | mecET |  | mecEU |  | mecEV |  | mecEW |  | mecEX |  | mecEY |  | mecEZ |  | mecFA |  | mecFB |  | mecFC |  | mecFD |  | mecFE |  | mecFF |  | mecFG |  | mecFH |  | mecFI |  | mecFJ |  | mecFK |  | mecFL |  | mecFM |  | mecFN |  | mecFO |  | mecFP |  | mecFQ |  | mecFR |  | mecFS |  | mecFT |  | mecFU |  | mecFV |  | mecFW |  | mecFX |  | mecFY |  | mecFZ |  | mecGA |  | mecGB |  | mecGC |  | mecGD |  | mecGE |  | mecGF |  | mecGG |  | mecGH |  | mecGI |  | mecGJ |  | mecGK |  | mecGL |  | mecGM |  | mecGN |  | mecGO |  | mecGP |  | mecGQ |  | mecGR |  | mecGS |  | mecGT |  | mecGU |  | mecGV |  | mecGW |  | mecGX |  | mecGY |  | mecGZ |  | mecHA |  | mecHB |  | mecHC |  | mecHD |  | mecHE |  | mecHF |  | mecHG |  | mecHI |  | mecHJ |  | mecHK |  | mecHL |  | mecHM |  | mecHN |  | mecHO |  | mecHP |  | mecHQ |  | mecHR |  | mecHS |  | mecHT |  | mecHU |  | mecHV |  | mecHW |  | mecHX |  | mecHY |  | mecHZ |  | mecIA |  | mecIB |  | mecIC |  | mecID |  | mecIE |  | mecIF |  | mecIG |  | mecIH |  | mecII |  | mecIJ |  | mecIK |  | mecIL |  | mecIM |  | mecIN |  | mecIO |  | mecIP |  | mecIQ |  | mecIR |  | mecIS |  | mecIT |  | mecIU |  | mecIV |  | mecIW |  | mecIX |  | mecIY |  | mecIZ |  | mecJA |  | mecJB |  | mecJC |  | mecJD |  | mecJE |  | mecJF |  | mecJG |  | mecJH |  | mecJI |  | mecJJ |  | mecJK |  | mecJL |  | mecJM |  | mecJN |  | mecJO |  | mecJP |  | mecJQ |  | mecJR |  | mecJS |  | mecJT |  | mecJU |  | mecJV |  | mecJW |  | mecJX |  | mecJY |  | mecJZ |  | mecKA |  | mecKB |  | mecKC |  | mecKD |  | mecKE |  | mecKF |  | mecKG |  | mecKH |  | mecKI |  | mecKJ |  | mecKL |  | mecKM |  | mecKN |  | mecKO |  | mecKP |  | mecKQ |  | mecKR |  | mecKS |  | mecKT |  | mecKU |  | mecKV |  | mecKW |  | mecKX |  | mecKY |  | mecKZ |  | mecLA |  | mecLB |  | mecLC |  | mecLD |  | mecLE |  | mecLF |  | mecLG |  | mecLH |  | mecLI |  | mecLJ |  | mecLK |  | mecLL |  | mecLM |  | mecLN |  | mecLO |  | mecLP |  | mecLQ |  | mecLR |  | mecLS |  | mecLT |  | mecLU |  | mecLV |  | mecLW |  | mecLX |  | mecLY |  | mecLZ |  | mecMA |  | mecMB |  | mecMC |  | mecMD |  | mecME |  | mecMF |  | mecMG |  | mecMH |  | mecMI |  | mecMJ |  | mecMK |  | mecML |  | mecMN |  | mecMO |  | mecMP |  | mecMQ |  | mecMR |  | mecMS |  | mecMT |  | mecMU |  | mecMV |  | mecMW |  | mecMX |  | mecMY |  | mecMZ |  | mecNA |  | mecNB |  | mecNC |  | mecND |  | mecNE |  | mecNF |  | mecNG |  | mecNH |  | mecNI |  | mecNJ |  | mecNK |  | mecNL |  | mecNM |  | mecNN |  | mecNO |  | mecNP |  | mecNQ |  | mecNR |  | mecNS |  | mecNT |  | mecNU |  | mecNV |  | mecNW |  | mecNX |  | mecNY |  | mecNZ |  | mecOA |  | mecOB |  | mecOC |  | mecOD |  | mecOE |  | mecOF |  | mecOG |  | mecOH |  | mecOI |  | mecOJ |  | mecOK |  | mecOL |  | mecOM |  | mecON |  | mecOO |  | mecOP |  | mecOQ |  | mecOR |  | mecOS |  | mecOT |  | mecOU |  | mecOV |  | mecOW |  | mecOX |  | mecOY |  | mecOZ |  | mecPA |  | mecPB |  | mecPC |  | mecPD |  | mecPE |  | mecPF |  | mecPG |  | mecPH |  | mecPI |  | mecPJ |  | mecPK |  | mecPL |  | mecPM |  | mecPN |  | mecPO |  | mecPP |  | mecPQ |  | mecPR |  | mecPS |  | mecPT |  | mecPU |  | mecPV |  | mecPW |  | mecPX |  | mecPY |  | mecPZ |  | mecQA |  | mecQB |  | mecQC |  | mecQD |  | mecQE |  | mecQF |  | mecQG |  | mecQH |  | mecQI |  | mecQJ |  | mecQK |  | mecQL |  | mecQM |  | mecQN |  | mecQO |  | mecQP |  | mecQQ |  | mecQR |  | mecQS |  | mecQT |  | mecQU |  | mecQV |  | mecQW |  | mecQX |  | mecQY |  | mecQZ |  | mecRA |  | mecRB |  | mecRC |  | mecRD |  | mecRE |  | mecRF |  | mecRG |  | mecRH |  | mecRI |  | mecRJ |  | mecRK |  | mecRL |  | mecRM |  | mecRN |  | mecRO |  | mecRP |  | mecRQ |  | mecRR |  | mecRS |  | mecRT |  | mecRU |  | mecRV |  | mecRW |  | mecRX |  | mecRY |  | mecRZ |  | mecSA |  | mecSB |  | mecSC |  | mecSD |  | mecSE |  | mecSF |  | mecSG |  | mecSH |  | mecSI |  | mecSJ |  | mecSK |  | mecSL |  | mecSM |  | mecSN |  | mecSO |  | mecSP |  | mecSQ |  | mecSR |  | mecSS |  | mecST |  | mecSU |  | mecSV |  | mecSW |  | mecSX |  | mecSY |  | mecSZ |  | mecTA |  | mecTB |  | mecTC |  | mecTD |  | mecTE |  | mecTF |  | mecTG |  | mecTH |  | mecTI |  | mecTJ |  | mecTK |  | mecTL |  | mecTM |  | mecTN |  | mecTO |  | mecTP |  | mecTQ |  | mecTR |  | mecTS |  | mecTT |  | mecTU |  | mecTV |  | mecTW |  | mecTX |  | mecTY |  | mecTZ |  | mecUA |  | mecUB |  | mecUC |  | mecUD |  | mecUE |  | mecUF |  | mecUG |  | mecUH |  | mecUI |  | mecUJ |  | mecUK |  | mecUL |  | mecUM |  | mecUN |  | mecUO |  | mecUP |  | mecUQ |  | mecUR |  | mecUS |  | mecUT |  | mecUU |  | mecUV |  | mecUW |  | mecUX |  | mecUY |  | mecUZ |  | mecVA |  | mecVB |  | mecVC |  | mecVD |  | mecVE |  | mecVF |  | mecVG |  | mecVH |  | mecVI |  | mecVJ |  | mecVK |  | mecVL |  | mecVM |  | mecVN |  | mecVO |  | mecVP |  | mecVQ |  | mecVR |  | mecVS |  | mecVT |  | mecVU |  | mecVV |  | mecVW |  | mecVX |  | mecVY |  | mecVZ |  | mecWA |  | mecWB |  | mecWC |  | mecWD |  | mecWE |  | mecWF |  | mecWG |  | mecWH |  | mecWI |  | mecWJ |  | mecWK |  | mecWL |  | mecWM |  | mecWN |  | mecWO |  | mecWP |  | mecWQ |  | mecWR |  | mecWS |  | mecWT |  | mecWU |  | mecWV |  | mecWW |  | mecWX |  | mecWY |  | mecWZ |  | mecXA |  | mecXB |  | mecXC |  | mecXD |  | mecXE |  | mecXF |  | mecXG |  | mecXH |  | mecXI |  | mecXJ |  | mecXK |  | mecXL |  | mecXM |  | mecXN |  | mecXO |  | mecXP |  | mecXQ |  | mecXR |  | mecXS |  | mecXT |  | mecXU |  | mecXV |  | mecXW |  | mecXX |  | mecXY |  | mecXZ |  | mecYA |  | mecYB |  | mecYC |  | mecYD |  | mecYE |  | mecYF |  | mecYG |  | mecYH |  | mecYI |  | mecYJ |  | mecYK |  | mecYL |  | mecYM |  | mecYN |  | mecYO |  | mecYP |  | mecYQ |  | mecYR |  | mecYS |  | mecYT |  | mecYU |  | mecYV |  | mecYW |  | mecYX |  | mecYY |  | mecYZ |  | mecZA |  | mecZB |  | mecZC |  | mecZD |  | mecZE |  | mecZF |  | mecZG |  | mecZH |  | mecZI |  | mecZJ |  | mecZK |  | mecZL |  | mecZM |  | mecZN |  | mecZO |  | mecZP |  | mecZQ |  | mecZR |  | mecZS |  | mecZT |  | mecZU |  | mecZV |  | mecZW |  | mecZX |  | mecZY |  | mecZZ |  |
|            |                           |                               | meaA                                     | delta_mecR | ugpD         | ccrA-1    | ccrB-1 | plgSCC (COL) | QSR88-dcs | ccrA-2   | ccrB-2   | ldpA-SCC | ldpB-SCC | ldpC-SCC | ldpD-SCC | ldpE-SCC | mecl   | mecR | ccrA-3 | ccrB-3                   | mecA                     | mecB           | ccrAA (MRS34HT) p robe 1 | ccrAA (MRS34HT) p robe 2 | ccrC (85-2082) | ccrA-4        | ccrB-4 | mecC | bla2SCCmec XI |  |                                          |  |      |  |      |  |      |  |      |  |      |  |      |  |      |  |      |  |      |  |      |  |      |  |      |  |       |  |       |  |       |  |       |  |       |  |       |  |       |  |       |  |       |  |       |  |       |  |       |  |       |  |       |  |       |  |       |  |       |  |       |  |       |  |       |  |       |  |       |  |       |  |       |  |       |  |       |  |       |  |       |  |       |  |       |  |       |  |       |  |       |  |       |  |       |  |       |  |       |  |       |  |       |  |       |  |       |  |       |  |       |  |       |  |       |  |       |  |       |  |       |  |       |  |       |  |       |  |       |  |       |  |       |  |       |  |       |  |       |  |       |  |       |  |       |  |       |  |       |  |       |  |       |  |       |  |       |  |       |  |       |  |       |  |       |  |       |  |       |  |       |  |       |  |       |  |       |  |       |  |       |  |       |  |       |  |       |  |       |  |       |  |       |  |       |  |       |  |       |  |       |  |       |  |       |  |       |  |       |  |       |  |       |  |       |  |       |  |       |  |       |  |       |  |       |  |       |  |       |  |       |  |       |  |       |  |       |  |       |  |       |  |       |  |       |  |       |  |       |  |       |  |       |  |       |  |       |  |       |  |       |  |       |  |       |  |       |  |       |  |       |  |       |  |       |  |       |  |       |  |       |  |       |  |       |  |       |  |       |  |       |  |       |  |       |  |       |  |       |  |       |  |       |  |       |  |       |  |       |  |       |  |       |  |       |  |       |  |       |  |       |  |       |  |       |  |       |  |       |  |       |  |       |  |       |  |       |  |       |  |       |  |       |  |       |  |       |  |       |  |       |  |       |  |       |  |       |  |       |  |       |  |       |  |       |  |       |  |       |  |       |  |       |  |       |  |       |  |       |  |       |  |       |  |       |  |       |  |       |  |       |  |       |  |       |  |       |  |       |  |       |  |       |  |       |  |       |  |       |  |       |  |       |  |       |  |       |  |       |  |       |  |       |  |       |  |       |  |       |  |       |  |       |  |       |  |       |  |       |  |       |  |       |  |       |  |       |  |       |  |       |  |       |  |       |  |       |  |       |  |       |  |       |  |       |  |       |  |       |  |       |  |       |  |       |  |       |  |       |  |       |  |       |  |       |  |       |  |       |  |       |  |       |  |       |  |       |  |       |  |       |  |       |  |       |  |       |  |       |  |       |  |       |  |       |  |       |  |       |  |       |  |       |  |       |  |       |  |       |  |       |  |       |  |       |  |       |  |       |  |       |  |       |  |       |  |       |  |       |  |       |  |       |  |       |  |       |  |       |  |       |  |       |  |       |  |       |  |       |  |       |  |       |  |       |  |       |  |       |  |       |  |       |  |       |  |       |  |       |  |       |  |       |  |       |  |       |  |       |  |       |  |       |  |       |  |       |  |       |  |       |  |       |  |       |  |       |  |       |  |       |  |       |  |       |  |       |  |       |  |       |  |       |  |       |  |       |  |       |  |       |  |       |  |       |  |       |  |       |  |       |  |       |  |       |  |       |  |       |  |       |  |       |  |       |  |       |  |       |  |       |  |       |  |       |  |       |  |       |  |       |  |       |  |       |  |       |  |       |  |       |  |       |  |       |  |       |  |       |  |       |  |       |  |       |  |       |  |       |  |       |  |       |  |       |  |       |  |       |  |       |  |       |  |       |  |       |  |       |  |       |  |       |  |       |  |       |  |       |  |       |  |       |  |       |  |       |  |       |  |       |  |       |  |       |  |       |  |       |  |       |  |       |  |       |  |       |  |       |  |       |  |       |  |       |  |       |  |       |  |       |  |       |  |       |  |       |  |       |  |       |  |       |  |       |  |       |  |       |  |       |  |       |  |       |  |       |  |       |  |       |  |       |  |       |  |       |  |       |  |       |  |       |  |       |  |       |  |       |  |       |  |       |  |       |  |       |  |       |  |       |  |       |  |       |  |       |  |       |  |       |  |       |  |       |  |       |  |       |  |       |  |       |  |       |  |       |  |       |  |       |  |       |  |       |  |       |  |       |  |       |  |       |  |       |  |       |  |       |  |       |  |       |  |       |  |       |  |       |  |       |  |       |  |       |  |       |  |       |  |       |  |       |  |       |  |       |  |       |  |       |  |       |  |       |  |       |  |       |  |       |  |       |  |       |  |       |  |       |  |       |  |       |  |       |  |       |  |       |  |       |  |       |  |       |  |       |  |       |  |       |  |       |  |       |  |       |  |       |  |       |  |       |  |       |  |       |  |       |  |       |  |       |  |       |  |       |  |       |  |       |  |       |  |       |  |       |  |       |  |       |  |       |  |       |  |       |  |       |  |       |  |       |  |       |  |       |  |       |  |       |  |       |  |       |  |       |  |       |  |       |  |       |  |       |  |       |  |       |  |       |  |       |  |       |  |       |  |       |  |       |  |       |  |       |  |       |  |       |  |       |  |       |  |       |  |       |  |       |  |       |  |       |  |       |  |       |  |       |  |       |  |       |  |       |  |       |  |       |  |       |  |       |  |       |  |       |  |       |  |       |  |       |  |       |  |       |  |       |  |       |  |       |  |       |  |       |  |       |  |       |  |       |  |       |  |       |  |       |  |       |  |       |  |       |  |       |  |       |  |       |  |       |  |       |  |       |  |       |  |       |  |       |  |       |  |       |  |       |  |       |  |       |  |       |  |       |  |       |  |       |  |       |  |       |  |       |  |       |  |       |  |       |  |       |  |       |  |       |  |       |  |       |  |       |  |       |  |       |  |       |  |       |  |       |  |       |  |       |  |       |  |       |  |       |  |       |  |       |  |       |  |       |  |       |  |       |  |       |  |       |  |       |  |       |  |       |  |       |  |       |  |       |  |       |  |       |  |       |  |       |  |       |  |       |  |       |  |       |  |       |  |       |  |       |  |       |  |       |  |       |  |       |  |       |  |       |  |       |  |       |  |       |  |       |  |       |  |       |  |       |  |       |  |       |  |       |  |       |  |       |  |       |  |       |  |       |  |       |  |       |  |       |  |       |  |       |  |       |  |       |  |       |  |       |  |       |  |       |  |       |  |       |  |       |  |       |  |       |  |       |  |       |  |       |  |       |  |       |  |       |  |       |  |       |  |       |  |       |  |       |  |       |  |       |  |       |  |       |  |       |  |
| meaA       | delta_mecR                | ugpD                          | ccrA-1                                   | ccrB-1     | plgSCC (COL) | QSR88-dcs | ccrA-2 | ccrB-2       | ldpA-SCC  | ldpB-SCC | ldpC-SCC | ldpD-SCC | ldpE-SCC | mecl     | mecR     | ccrA-3   | ccrB-3 | mecA | mecB   | ccrAA (MRS34HT) p robe 1 | ccrAA (MRS34HT) p robe 2 | ccrC (85-2082) | ccrA-4                   | ccrB-4                   | mecC           | bla2SCCmec XI |        |      |               |  |                                          |  |      |  |      |  |      |  |      |  |      |  |      |  |      |  |      |  |      |  |      |  |      |  |      |  |       |  |       |  |       |  |       |  |       |  |       |  |       |  |       |  |       |  |       |  |       |  |       |  |       |  |       |  |       |  |       |  |       |  |       |  |       |  |       |  |       |  |       |  |       |  |       |  |       |  |       |  |       |  |       |  |       |  |       |  |       |  |       |  |       |  |       |  |       |  |       |  |       |  |       |  |       |  |       |  |       |  |       |  |       |  |       |  |       |  |       |  |       |  |       |  |       |  |       |  |       |  |       |  |       |  |       |  |       |  |       |  |       |  |       |  |       |  |       |  |       |  |       |  |       |  |       |  |       |  |       |  |       |  |       |  |       |  |       |  |       |  |       |  |       |  |       |  |       |  |       |  |       |  |       |  |       |  |       |  |       |  |       |  |       |  |       |  |       |  |       |  |       |  |       |  |       |  |       |  |       |  |       |  |       |  |       |  |       |  |       |  |       |  |       |  |       |  |       |  |       |  |       |  |       |  |       |  |       |  |       |  |       |  |       |  |       |  |       |  |       |  |       |  |       |  |       |  |       |  |       |  |       |  |       |  |       |  |       |  |       |  |       |  |       |  |       |  |       |  |       |  |       |  |       |  |       |  |       |  |       |  |       |  |       |  |       |  |       |  |       |  |       |  |       |  |       |  |       |  |       |  |       |  |       |  |       |  |       |  |       |  |       |  |       |  |       |  |       |  |       |  |       |  |       |  |       |  |       |  |       |  |       |  |       |  |       |  |       |  |       |  |       |  |       |  |       |  |       |  |       |  |       |  |       |  |       |  |       |  |       |  |       |  |       |  |       |  |       |  |       |  |       |  |       |  |       |  |       |  |       |  |       |  |       |  |       |  |       |  |       |  |       |  |       |  |       |  |       |  |       |  |       |  |       |  |       |  |       |  |       |  |       |  |       |  |       |  |       |  |       |  |       |  |       |  |       |  |       |  |       |  |       |  |       |  |       |  |       |  |       |  |       |  |       |  |       |  |       |  |       |  |       |  |       |  |       |  |       |  |       |  |       |  |       |  |       |  |       |  |       |  |       |  |       |  |       |  |       |  |       |  |       |  |       |  |       |  |       |  |       |  |       |  |       |  |       |  |       |  |       |  |       |  |       |  |       |  |       |  |       |  |       |  |       |  |       |  |       |  |       |  |       |  |       |  |       |  |       |  |       |  |       |  |       |  |       |  |       |  |       |  |       |  |       |  |       |  |       |  |       |  |       |  |       |  |       |  |       |  |       |  |       |  |       |  |       |  |       |  |       |  |       |  |       |  |       |  |       |  |       |  |       |  |       |  |       |  |       |  |       |  |       |  |       |  |       |  |       |  |       |  |       |  |       |  |       |  |       |  |       |  |       |  |       |  |       |  |       |  |       |  |       |  |       |  |       |  |       |  |       |  |       |  |       |  |       |  |       |  |       |  |       |  |       |  |       |  |       |  |       |  |       |  |       |  |       |  |       |  |       |  |       |  |       |  |       |  |       |  |       |  |       |  |       |  |       |  |       |  |       |  |       |  |       |  |       |  |       |  |       |  |       |  |       |  |       |  |       |  |       |  |       |  |       |  |       |  |       |  |       |  |       |  |       |  |       |  |       |  |       |  |       |  |       |  |       |  |       |  |       |  |       |  |       |  |       |  |       |  |       |  |       |  |       |  |       |  |       |  |       |  |       |  |       |  |       |  |       |  |       |  |       |  |       |  |       |  |       |  |       |  |       |  |       |  |       |  |       |  |       |  |       |  |       |  |       |  |       |  |       |  |       |  |       |  |       |  |       |  |       |  |       |  |       |  |       |  |       |  |       |  |       |  |       |  |       |  |       |  |       |  |       |  |       |  |       |  |       |  |       |  |       |  |       |  |       |  |       |  |       |  |       |  |       |  |       |  |       |  |       |  |       |  |       |  |       |  |       |  |       |  |       |  |       |  |       |  |       |  |       |  |       |  |       |  |       |  |       |  |       |  |       |  |       |  |       |  |       |  |       |  |       |  |       |  |       |  |       |  |       |  |       |  |       |  |       |  |       |  |       |  |       |  |       |  |       |  |       |  |       |  |       |  |       |  |       |  |       |  |       |  |       |  |       |  |       |  |       |  |       |  |       |  |       |  |       |  |       |  |       |  |       |  |       |  |       |  |       |  |       |  |       |  |       |  |       |  |       |  |       |  |       |  |       |  |       |  |       |  |       |  |       |  |       |  |       |  |       |  |       |  |       |  |       |  |       |  |       |  |       |  |       |  |       |  |       |  |       |  |       |  |       |  |       |  |       |  |       |  |       |  |       |  |       |  |       |  |       |  |       |  |       |  |       |  |       |  |       |  |       |  |       |  |       |  |       |  |       |  |       |  |       |  |       |  |       |  |       |  |       |  |       |  |       |  |       |  |       |  |       |  |       |  |       |  |       |  |       |  |       |  |       |  |       |  |       |  |       |  |       |  |       |  |       |  |       |  |       |  |       |  |       |  |       |  |       |  |       |  |       |  |       |  |       |  |       |  |       |  |       |  |       |  |       |  |       |  |       |  |       |  |       |  |       |  |       |  |       |  |       |  |       |  |       |  |       |  |       |  |       |  |       |  |       |  |       |  |       |  |       |  |       |  |       |  |       |  |       |  |       |  |       |  |       |  |       |  |       |  |       |  |       |  |       |  |       |  |       |  |       |  |       |  |       |  |       |  |       |  |       |  |       |  |       |  |       |  |       |  |       |  |       |  |       |  |       |  |       |  |       |  |       |  |       |  |       |  |       |  |       |  |       |  |       |  |       |  |       |  |       |  |       |  |       |  |       |  |       |  |       |  |       |  |       |  |       |  |       |  |       |  |       |  |       |  |       |  |       |  |       |  |       |  |       |  |       |  |       |  |       |  |       |  |       |  |       |  |       |  |       |  |       |  |       |  |       |  |       |  |       |  |       |  |       |  |       |  |       |  |       |  |       |  |       |  |       |  |       |  |       |  |       |  |       |  |       |  |       |  |       |  |       |  |       |  |       |  |       |  |       |  |       |  |       |  |       |  |       |  |       |  |       |  |       |  |       |  |       |  |       |  |       |  |       |  |
| 203228     | CC0091                    | CC1-MSSA                      | NEG                                      | NEG        | NEG          | NEG       | AMB    | NEG          | NEG       | NEG      | NEG      | NEG      | NEG      | NEG      | NEG      | NEG      | NEG    | NEG  | NEG    | NEG                      | NEG                      | NEG            | NEG                      | NEG                      | NEG            | 0             | 0      |      |               |  |                                          |  |      |  |      |  |      |  |      |  |      |  |      |  |      |  |      |  |      |  |      |  |      |  |      |  |       |  |       |  |       |  |       |  |       |  |       |  |       |  |       |  |       |  |       |  |       |  |       |  |       |  |       |  |       |  |       |  |       |  |       |  |       |  |       |  |       |  |       |  |       |  |       |  |       |  |       |  |       |  |       |  |       |  |       |  |       |  |       |  |       |  |       |  |       |  |       |  |       |  |       |  |       |  |       |  |       |  |       |  |       |  |       |  |       |  |       |  |       |  |       |  |       |  |       |  |       |  |       |  |       |  |       |  |       |  |       |  |       |  |       |  |       |  |       |  |       |  |       |  |       |  |       |  |       |  |       |  |       |  |       |  |       |  |       |  |       |  |       |  |       |  |       |  |       |  |       |  |       |  |       |  |       |  |       |  |       |  |       |  |       |  |       |  |       |  |       |  |       |  |       |  |       |  |       |  |       |  |       |  |       |  |       |  |       |  |       |  |       |  |       |  |       |  |       |  |       |  |       |  |       |  |       |  |       |  |       |  |       |  |       |  |       |  |       |  |       |  |       |  |       |  |       |  |       |  |       |  |       |  |       |  |       |  |       |  |       |  |       |  |       |  |       |  |       |  |       |  |       |  |       |  |       |  |       |  |       |  |       |  |       |  |       |  |       |  |       |  |       |  |       |  |       |  |       |  |       |  |       |  |       |  |       |  |       |  |       |  |       |  |       |  |       |  |       |  |       |  |       |  |       |  |       |  |       |  |       |  |       |  |       |  |       |  |       |  |       |  |       |  |       |  |       |  |       |  |       |  |       |  |       |  |       |  |       |  |       |  |       |  |       |  |       |  |       |  |       |  |       |  |       |  |       |  |       |  |       |  |       |  |       |  |       |  |       |  |       |  |       |  |       |  |       |  |       |  |       |  |       |  |       |  |       |  |       |  |       |  |       |  |       |  |       |  |       |  |       |  |       |  |       |  |       |  |       |  |       |  |       |  |       |  |       |  |       |  |       |  |       |  |       |  |       |  |       |  |       |  |       |  |       |  |       |  |       |  |       |  |       |  |       |  |       |  |       |  |       |  |       |  |       |  |       |  |       |  |       |  |       |  |       |  |       |  |       |  |       |  |       |  |       |  |       |  |       |  |       |  |       |  |       |  |       |  |       |  |       |  |       |  |       |  |       |  |       |  |       |  |       |  |       |  |       |  |       |  |       |  |       |  |       |  |       |  |       |  |       |  |       |  |       |  |       |  |       |  |       |  |       |  |       |  |       |  |       |  |       |  |       |  |       |  |       |  |       |  |       |  |       |  |       |  |       |  |       |  |       |  |       |  |       |  |       |  |       |  |       |  |       |  |       |  |       |  |       |  |       |  |       |  |       |  |       |  |       |  |       |  |       |  |       |  |       |  |       |  |       |  |       |  |       |  |       |  |       |  |       |  |       |  |       |  |       |  |       |  |       |  |       |  |       |  |       |  |       |  |       |  |       |  |       |  |       |  |       |  |       |  |       |  |       |  |       |  |       |  |       |  |       |  |       |  |       |  |       |  |       |  |       |  |       |  |       |  |       |  |       |  |       |  |       |  |       |  |       |  |       |  |       |  |       |  |       |  |       |  |       |  |       |  |       |  |       |  |       |  |       |  |       |  |       |  |       |  |       |  |       |  |       |  |       |  |       |  |       |  |       |  |       |  |       |  |       |  |       |  |       |  |       |  |       |  |       |  |       |  |       |  |       |  |       |  |       |  |       |  |       |  |       |  |       |  |       |  |       |  |       |  |       |  |       |  |       |  |       |  |       |  |       |  |       |  |       |  |       |  |       |  |       |  |       |  |       |  |       |  |       |  |       |  |       |  |       |  |       |  |       |  |       |  |       |  |       |  |       |  |       |  |       |  |       |  |       |  |       |  |       |  |       |  |       |  |       |  |       |  |       |  |       |  |       |  |       |  |       |  |       |  |       |  |       |  |       |  |       |  |       |  |       |  |       |  |       |  |       |  |       |  |       |  |       |  |       |  |       |  |       |  |       |  |       |  |       |  |       |  |       |  |       |  |       |  |       |  |       |  |       |  |       |  |       |  |       |  |       |  |       |  |       |  |       |  |       |  |       |  |       |  |       |  |       |  |       |  |       |  |       |  |       |  |       |  |       |  |       |  |       |  |       |  |       |  |       |  |       |  |       |  |       |  |       |  |       |  |       |  |       |  |       |  |       |  |       |  |       |  |       |  |       |  |       |  |       |  |       |  |       |  |       |  |       |  |       |  |       |  |       |  |       |  |       |  |       |  |       |  |       |  |       |  |       |  |       |  |       |  |       |  |       |  |       |  |       |  |       |  |       |  |       |  |       |  |       |  |       |  |       |  |       |  |       |  |       |  |       |  |       |  |       |  |       |  |       |  |       |  |       |  |       |  |       |  |       |  |       |  |       |  |       |  |       |  |       |  |       |  |       |  |       |  |       |  |       |  |       |  |       |  |       |  |       |  |       |  |       |  |       |  |       |  |       |  |       |  |       |  |       |  |       |  |       |  |       |  |       |  |       |  |       |  |       |  |       |  |       |  |       |  |       |  |       |  |       |  |       |  |       |  |       |  |       |  |       |  |       |  |       |  |       |  |       |  |       |  |       |  |       |  |       |  |       |  |       |  |       |  |       |  |       |  |       |  |       |  |       |  |       |  |       |  |       |  |       |  |       |  |       |  |       |  |       |  |       |  |       |  |       |  |       |  |       |  |       |  |       |  |       |  |       |  |       |  |       |  |       |  |       |  |       |  |       |  |       |  |       |  |       |  |       |  |       |  |       |  |       |  |       |  |       |  |       |  |       |  |       |  |       |  |       |  |       |  |       |  |       |  |       |  |       |  |       |  |       |  |       |  |       |  |       |  |       |  |       |  |       |  |       |  |       |  |       |  |       |  |       |  |       |  |       |  |       |  |       |  |       |  |       |  |       |  |       |  |       |  |       |  |       |  |       |  |       |  |       |  |       |  |       |  |       |  |       |  |       |  |       |  |       |  |       |  |       |  |       |  |       |  |       |  |       |  |       |  |       |  |       |  |       |  |       |  |       |  |       |  |       |  |       |  |       |  |       |  |
| 203229     | CC0091                    | CC1-MSSA                      | NEG                                      | NEG        | NEG          | NEG       | AMB    | NEG          | NEG       | NEG      | NEG      | NEG      | NEG      | NEG      | NEG      | NEG      | NEG    | NEG  | NEG    | NEG                      | NEG                      | NEG            | NEG                      | NEG                      | NEG            | 0             | 0      |      |               |  |                                          |  |      |  |      |  |      |  |      |  |      |  |      |  |      |  |      |  |      |  |      |  |      |  |      |  |       |  |       |  |       |  |       |  |       |  |       |  |       |  |       |  |       |  |       |  |       |  |       |  |       |  |       |  |       |  |       |  |       |  |       |  |       |  |       |  |       |  |       |  |       |  |       |  |       |  |       |  |       |  |       |  |       |  |       |  |       |  |       |  |       |  |       |  |       |  |       |  |       |  |       |  |       |  |       |  |       |  |       |  |       |  |       |  |       |  |       |  |       |  |       |  |       |  |       |  |       |  |       |  |       |  |       |  |       |  |       |  |       |  |       |  |       |  |       |  |       |  |       |  |       |  |       |  |       |  |       |  |       |  |       |  |       |  |       |  |       |  |       |  |       |  |       |  |       |  |       |  |       |  |       |  |       |  |       |  |       |  |       |  |       |  |       |  |       |  |       |  |       |  |       |  |       |  |       |  |       |  |       |  |       |  |       |  |       |  |       |  |       |  |       |  |       |  |       |  |       |  |       |  |       |  |       |  |       |  |       |  |       |  |       |  |       |  |       |  |       |  |       |  |       |  |       |  |       |  |       |  |       |  |       |  |       |  |       |  |       |  |       |  |       |  |       |  |       |  |       |  |       |  |       |  |       |  |       |  |       |  |       |  |       |  |       |  |       |  |       |  |       |  |       |  |       |  |       |  |       |  |       |  |       |  |       |  |       |  |       |  |       |  |       |  |       |  |       |  |       |  |       |  |       |  |       |  |       |  |       |  |       |  |       |  |       |  |       |  |       |  |       |  |       |  |       |  |       |  |       |  |       |  |       |  |       |  |       |  |       |  |       |  |       |  |       |  |       |  |       |  |       |  |       |  |       |  |       |  |       |  |       |  |       |  |       |  |       |  |       |  |       |  |       |  |       |  |       |  |       |  |       |  |       |  |       |  |       |  |       |  |       |  |       |  |       |  |       |  |       |  |       |  |       |  |       |  |       |  |       |  |       |  |       |  |       |  |       |  |       |  |       |  |       |  |       |  |       |  |       |  |       |  |       |  |       |  |       |  |       |  |       |  |       |  |       |  |       |  |       |  |       |  |       |  |       |  |       |  |       |  |       |  |       |  |       |  |       |  |       |  |       |  |       |  |       |  |       |  |       |  |       |  |       |  |       |  |       |  |       |  |       |  |       |  |       |  |       |  |       |  |       |  |       |  |       |  |       |  |       |  |       |  |       |  |       |  |       |  |       |  |       |  |       |  |       |  |       |  |       |  |       |  |       |  |       |  |       |  |       |  |       |  |       |  |       |  |       |  |       |  |       |  |       |  |       |  |       |  |       |  |       |  |       |  |       |  |       |  |       |  |       |  |       |  |       |  |       |  |       |  |       |  |       |  |       |  |       |  |       |  |       |  |       |  |       |  |       |  |       |  |       |  |       |  |       |  |       |  |       |  |       |  |       |  |       |  |       |  |       |  |       |  |       |  |       |  |       |  |       |  |       |  |       |  |       |  |       |  |       |  |       |  |       |  |       |  |       |  |       |  |       |  |       |  |       |  |       |  |       |  |       |  |       |  |       |  |       |  |       |  |       |  |       |  |       |  |       |  |       |  |       |  |       |  |       |  |       |  |       |  |       |  |       |  |       |  |       |  |       |  |       |  |       |  |       |  |       |  |       |  |       |  |       |  |       |  |       |  |       |  |       |  |       |  |       |  |       |  |       |  |       |  |       |  |       |  |       |  |       |  |       |  |       |  |       |  |       |  |       |  |       |  |       |  |       |  |       |  |       |  |       |  |       |  |       |  |       |  |       |  |       |  |       |  |       |  |       |  |       |  |       |  |       |  |       |  |       |  |       |  |       |  |       |  |       |  |       |  |       |  |       |  |       |  |       |  |       |  |       |  |       |  |       |  |       |  |       |  |       |  |       |  |       |  |       |  |       |  |       |  |       |  |       |  |       |  |       |  |       |  |       |  |       |  |       |  |       |  |       |  |       |  |       |  |       |  |       |  |       |  |       |  |       |  |       |  |       |  |       |  |       |  |       |  |       |  |       |  |       |  |       |  |       |  |       |  |       |  |       |  |       |  |       |  |       |  |       |  |       |  |       |  |       |  |       |  |       |  |       |  |       |  |       |  |       |  |       |  |       |  |       |  |       |  |       |  |       |  |       |  |       |  |       |  |       |  |       |  |       |  |       |  |       |  |       |  |       |  |       |  |       |  |       |  |       |  |       |  |       |  |       |  |       |  |       |  |       |  |       |  |       |  |       |  |       |  |       |  |       |  |       |  |       |  |       |  |       |  |       |  |       |  |       |  |       |  |       |  |       |  |       |  |       |  |       |  |       |  |       |  |       |  |       |  |       |  |       |  |       |  |       |  |       |  |       |  |       |  |       |  |       |  |       |  |       |  |       |  |       |  |       |  |       |  |       |  |       |  |       |  |       |  |       |  |       |  |       |  |       |  |       |  |       |  |       |  |       |  |       |  |       |  |       |  |       |  |       |  |       |  |       |  |       |  |       |  |       |  |       |  |       |  |       |  |       |  |       |  |       |  |       |  |       |  |       |  |       |  |       |  |       |  |       |  |       |  |       |  |       |  |       |  |       |  |       |  |       |  |       |  |       |  |       |  |       |  |       |  |       |  |       |  |       |  |       |  |       |  |       |  |       |  |       |  |       |  |       |  |       |  |       |  |       |  |       |  |       |  |       |  |       |  |       |  |       |  |       |  |       |  |       |  |       |  |       |  |       |  |       |  |       |  |       |  |       |  |       |  |       |  |       |  |       |  |       |  |       |  |       |  |       |  |       |  |       |  |       |  |       |  |       |  |       |  |       |  |       |  |       |  |       |  |       |  |       |  |       |  |       |  |       |  |       |  |       |  |       |  |       |  |       |  |       |  |       |  |       |  |       |  |       |  |       |  |       |  |       |  |       |  |       |  |       |  |       |  |       |  |       |  |       |  |       |  |       |  |       |  |       |  |       |  |       |  |       |  |       |  |       |  |       |  |       |  |       |  |       |  |       |  |       |  |       |  |       |  |       |  |       |  |       |  |       |  |       |  |       |  |       |  |       |  |       |  |       |  |       |  |       |  |       |  |       |  |
| 203230     | CC0091                    | CC1-MSSA                      | NEG                                      | NEG        | NEG          | NEG       | AMB    | NEG          | NEG       | NEG      | NEG      | NEG      | NEG      | NEG      | NEG      | NEG      | NEG    | NEG  | NEG    | NEG                      | NEG                      | NEG            | NEG                      | NEG                      | NEG            | 0             | 0      |      |               |  |                                          |  |      |  |      |  |      |  |      |  |      |  |      |  |      |  |      |  |      |  |      |  |      |  |      |  |       |  |       |  |       |  |       |  |       |  |       |  |       |  |       |  |       |  |       |  |       |  |       |  |       |  |       |  |       |  |       |  |       |  |       |  |       |  |       |  |       |  |       |  |       |  |       |  |       |  |       |  |       |  |       |  |       |  |       |  |       |  |       |  |       |  |       |  |       |  |       |  |       |  |       |  |       |  |       |  |       |  |       |  |       |  |       |  |       |  |       |  |       |  |       |  |       |  |       |  |       |  |       |  |       |  |       |  |       |  |       |  |       |  |       |  |       |  |       |  |       |  |       |  |       |  |       |  |       |  |       |  |       |  |       |  |       |  |       |  |       |  |       |  |       |  |       |  |       |  |       |  |       |  |       |  |       |  |       |  |       |  |       |  |       |  |       |  |       |  |       |  |       |  |       |  |       |  |       |  |       |  |       |  |       |  |       |  |       |  |       |  |       |  |       |  |       |  |       |  |       |  |       |  |       |  |       |  |       |  |       |  |       |  |       |  |       |  |       |  |       |  |       |  |       |  |       |  |       |  |       |  |       |  |       |  |       |  |       |  |       |  |       |  |       |  |       |  |       |  |       |  |       |  |       |  |       |  |       |  |       |  |       |  |       |  |       |  |       |  |       |  |       |  |       |  |       |  |       |  |       |  |       |  |       |  |       |  |       |  |       |  |       |  |       |  |       |  |       |  |       |  |       |  |       |  |       |  |       |  |       |  |       |  |       |  |       |  |       |  |       |  |       |  |       |  |       |  |       |  |       |  |       |  |       |  |       |  |       |  |       |  |       |  |       |  |       |  |       |  |       |  |       |  |       |  |       |  |       |  |       |  |       |  |       |  |       |  |       |  |       |  |       |  |       |  |       |  |       |  |       |  |       |  |       |  |       |  |       |  |       |  |       |  |       |  |       |  |       |  |       |  |       |  |       |  |       |  |       |  |       |  |       |  |       |  |       |  |       |  |       |  |       |  |       |  |       |  |       |  |       |  |       |  |       |  |       |  |       |  |       |  |       |  |       |  |       |  |       |  |       |  |       |  |       |  |       |  |       |  |       |  |       |  |       |  |       |  |       |  |       |  |       |  |       |  |       |  |       |  |       |  |       |  |       |  |       |  |       |  |       |  |       |  |       |  |       |  |       |  |       |  |       |  |       |  |       |  |       |  |       |  |       |  |       |  |       |  |       |  |       |  |       |  |       |  |       |  |       |  |       |  |       |  |       |  |       |  |       |  |       |  |       |  |       |  |       |  |       |  |       |  |       |  |       |  |       |  |       |  |       |  |       |  |       |  |       |  |       |  |       |  |       |  |       |  |       |  |       |  |       |  |       |  |       |  |       |  |       |  |       |  |       |  |       |  |       |  |       |  |       |  |       |  |       |  |       |  |       |  |       |  |       |  |       |  |       |  |       |  |       |  |       |  |       |  |       |  |       |  |       |  |       |  |       |  |       |  |       |  |       |  |       |  |       |  |       |  |       |  |       |  |       |  |       |  |       |  |       |  |       |  |       |  |       |  |       |  |       |  |       |  |       |  |       |  |       |  |       |  |       |  |       |  |       |  |       |  |       |  |       |  |       |  |       |  |       |  |       |  |       |  |       |  |       |  |       |  |       |  |       |  |       |  |       |  |       |  |       |  |       |  |       |  |       |  |       |  |       |  |       |  |       |  |       |  |       |  |       |  |       |  |       |  |       |  |       |  |       |  |       |  |       |  |       |  |       |  |       |  |       |  |       |  |       |  |       |  |       |  |       |  |       |  |       |  |       |  |       |  |       |  |       |  |       |  |       |  |       |  |       |  |       |  |       |  |       |  |       |  |       |  |       |  |       |  |       |  |       |  |       |  |       |  |       |  |       |  |       |  |       |  |       |  |       |  |       |  |       |  |       |  |       |  |       |  |       |  |       |  |       |  |       |  |       |  |       |  |       |  |       |  |       |  |       |  |       |  |       |  |       |  |       |  |       |  |       |  |       |  |       |  |       |  |       |  |       |  |       |  |       |  |       |  |       |  |       |  |       |  |       |  |       |  |       |  |       |  |       |  |       |  |       |  |       |  |       |  |       |  |       |  |       |  |       |  |       |  |       |  |       |  |       |  |       |  |       |  |       |  |       |  |       |  |       |  |       |  |       |  |       |  |       |  |       |  |       |  |       |  |       |  |       |  |       |  |       |  |       |  |       |  |       |  |       |  |       |  |       |  |       |  |       |  |       |  |       |  |       |  |       |  |       |  |       |  |       |  |       |  |       |  |       |  |       |  |       |  |       |  |       |  |       |  |       |  |       |  |       |  |       |  |       |  |       |  |       |  |       |  |       |  |       |  |       |  |       |  |       |  |       |  |       |  |       |  |       |  |       |  |       |  |       |  |       |  |       |  |       |  |       |  |       |  |       |  |       |  |       |  |       |  |       |  |       |  |       |  |       |  |       |  |       |  |       |  |       |  |       |  |       |  |       |  |       |  |       |  |       |  |       |  |       |  |       |  |       |  |       |  |       |  |       |  |       |  |       |  |       |  |       |  |       |  |       |  |       |  |       |  |       |  |       |  |       |  |       |  |       |  |       |  |       |  |       |  |       |  |       |  |       |  |       |  |       |  |       |  |       |  |       |  |       |  |       |  |       |  |       |  |       |  |       |  |       |  |       |  |       |  |       |  |       |  |       |  |       |  |       |  |       |  |       |  |       |  |       |  |       |  |       |  |       |  |       |  |       |  |       |  |       |  |       |  |       |  |       |  |       |  |       |  |       |  |       |  |       |  |       |  |       |  |       |  |       |  |       |  |       |  |       |  |       |  |       |  |       |  |       |  |       |  |       |  |       |  |       |  |       |  |       |  |       |  |       |  |       |  |       |  |       |  |       |  |       |  |       |  |       |  |       |  |       |  |       |  |       |  |       |  |       |  |       |  |       |  |       |  |       |  |       |  |       |  |       |  |       |  |       |  |       |  |       |  |       |  |       |  |       |  |       |  |       |  |       |  |       |  |       |  |       |  |       |  |       |  |       |  |       |  |       |  |       |  |       |  |       |  |       |  |       |  |       |  |       |  |
| 203231     | CC0091                    | CC1-MSSA                      | NEG                                      | NEG        | NEG          | NEG       | AMB    | NEG          | NEG       | NEG      | NEG      | NEG      | NEG      | NEG      | NEG      | NEG      | NEG    | NEG  | NEG    | NEG                      | NEG                      | NEG            | NEG                      | NEG                      | NEG            | 0             | 0      |      |               |  |                                          |  |      |  |      |  |      |  |      |  |      |  |      |  |      |  |      |  |      |  |      |  |      |  |      |  |       |  |       |  |       |  |       |  |       |  |       |  |       |  |       |  |       |  |       |  |       |  |       |  |       |  |       |  |       |  |       |  |       |  |       |  |       |  |       |  |       |  |       |  |       |  |       |  |       |  |       |  |       |  |       |  |       |  |       |  |       |  |       |  |       |  |       |  |       |  |       |  |       |  |       |  |       |  |       |  |       |  |       |  |       |  |       |  |       |  |       |  |       |  |       |  |       |  |       |  |       |  |       |  |       |  |       |  |       |  |       |  |       |  |       |  |       |  |       |  |       |  |       |  |       |  |       |  |       |  |       |  |       |  |       |  |       |  |       |  |       |  |       |  |       |  |       |  |       |  |       |  |       |  |       |  |       |  |       |  |       |  |       |  |       |  |       |  |       |  |       |  |       |  |       |  |       |  |       |  |       |  |       |  |       |  |       |  |       |  |       |  |       |  |       |  |       |  |       |  |       |  |       |  |       |  |       |  |       |  |       |  |       |  |       |  |       |  |       |  |       |  |       |  |       |  |       |  |       |  |       |  |       |  |       |  |       |  |       |  |       |  |       |  |       |  |       |  |       |  |       |  |       |  |       |  |       |  |       |  |       |  |       |  |       |  |       |  |       |  |       |  |       |  |       |  |       |  |       |  |       |  |       |  |       |  |       |  |       |  |       |  |       |  |       |  |       |  |       |  |       |  |       |  |       |  |       |  |       |  |       |  |       |  |       |  |       |  |       |  |       |  |       |  |       |  |       |  |       |  |       |  |       |  |       |  |       |  |       |  |       |  |       |  |       |  |       |  |       |  |       |  |       |  |       |  |       |  |       |  |       |  |       |  |       |  |       |  |       |  |       |  |       |  |       |  |       |  |       |  |       |  |       |  |       |  |       |  |       |  |       |  |       |  |       |  |       |  |       |  |       |  |       |  |       |  |       |  |       |  |       |  |       |  |       |  |       |  |       |  |       |  |       |  |       |  |       |  |       |  |       |  |       |  |       |  |       |  |       |  |       |  |       |  |       |  |       |  |       |  |       |  |       |  |       |  |       |  |       |  |       |  |       |  |       |  |       |  |       |  |       |  |       |  |       |  |       |  |       |  |       |  |       |  |       |  |       |  |       |  |       |  |       |  |       |  |       |  |       |  |       |  |       |  |       |  |       |  |       |  |       |  |       |  |       |  |       |  |       |  |       |  |       |  |       |  |       |  |       |  |       |  |       |  |       |  |       |  |       |  |       |  |       |  |       |  |       |  |       |  |       |  |       |  |       |  |       |  |       |  |       |  |       |  |       |  |       |  |       |  |       |  |       |  |       |  |       |  |       |  |       |  |       |  |       |  |       |  |       |  |       |  |       |  |       |  |       |  |       |  |       |  |       |  |       |  |       |  |       |  |       |  |       |  |       |  |       |  |       |  |       |  |       |  |       |  |       |  |       |  |       |  |       |  |       |  |       |  |       |  |       |  |       |  |       |  |       |  |       |  |       |  |       |  |       |  |       |  |       |  |       |  |       |  |       |  |       |  |       |  |       |  |       |  |       |  |       |  |       |  |       |  |       |  |       |  |       |  |       |  |       |  |       |  |       |  |       |  |       |  |       |  |       |  |       |  |       |  |       |  |       |  |       |  |       |  |       |  |       |  |       |  |       |  |       |  |       |  |       |  |       |  |       |  |       |  |       |  |       |  |       |  |       |  |       |  |       |  |       |  |       |  |       |  |       |  |       |  |       |  |       |  |       |  |       |  |       |  |       |  |       |  |       |  |       |  |       |  |       |  |       |  |       |  |       |  |       |  |       |  |       |  |       |  |       |  |       |  |       |  |       |  |       |  |       |  |       |  |       |  |       |  |       |  |       |  |       |  |       |  |       |  |       |  |       |  |       |  |       |  |       |  |       |  |       |  |       |  |       |  |       |  |       |  |       |  |       |  |       |  |       |  |       |  |       |  |       |  |       |  |       |  |       |  |       |  |       |  |       |  |       |  |       |  |       |  |       |  |       |  |       |  |       |  |       |  |       |  |       |  |       |  |       |  |       |  |       |  |       |  |       |  |       |  |       |  |       |  |       |  |       |  |       |  |       |  |       |  |       |  |       |  |       |  |       |  |       |  |       |  |       |  |       |  |       |  |       |  |       |  |       |  |       |  |       |  |       |  |       |  |       |  |       |  |       |  |       |  |       |  |       |  |       |  |       |  |       |  |       |  |       |  |       |  |       |  |       |  |       |  |       |  |       |  |       |  |       |  |       |  |       |  |       |  |       |  |       |  |       |  |       |  |       |  |       |  |       |  |       |  |       |  |       |  |       |  |       |  |       |  |       |  |       |  |       |  |       |  |       |  |       |  |       |  |       |  |       |  |       |  |       |  |       |  |       |  |       |  |       |  |       |  |       |  |       |  |       |  |       |  |       |  |       |  |       |  |       |  |       |  |       |  |       |  |       |  |       |  |       |  |       |  |       |  |       |  |       |  |       |  |       |  |       |  |       |  |       |  |       |  |       |  |       |  |       |  |       |  |       |  |       |  |       |  |       |  |       |  |       |  |       |  |       |  |       |  |       |  |       |  |       |  |       |  |       |  |       |  |       |  |       |  |       |  |       |  |       |  |       |  |       |  |       |  |       |  |       |  |       |  |       |  |       |  |       |  |       |  |       |  |       |  |       |  |       |  |       |  |       |  |       |  |       |  |       |  |       |  |       |  |       |  |       |  |       |  |       |  |       |  |       |  |       |  |       |  |       |  |       |  |       |  |       |  |       |  |       |  |       |  |       |  |       |  |       |  |       |  |       |  |       |  |       |  |       |  |       |  |       |  |       |  |       |  |       |  |       |  |       |  |       |  |       |  |       |  |       |  |       |  |       |  |       |  |       |  |       |  |       |  |       |  |       |  |       |  |       |  |       |  |       |  |       |  |       |  |       |  |       |  |       |  |       |  |       |  |       |  |       |  |       |  |       |  |       |  |       |  |       |  |       |  |       |  |       |  |       |  |       |  |       |  |       |  |       |  |       |  |       |  |       |  |       |  |       |  |       |  |       |  |       |  |       |  |       |  |
| 203232     | CC0091                    | CC1-MSSA                      | NEG                                      | NEG        | NEG          | NEG       | AMB    | NEG          | NEG       | NEG      | NEG      | NEG      | NEG      | NEG      | NEG      | NEG      | NEG    | NEG  | NEG    | NEG                      | NEG                      | NEG            | NEG                      | NEG                      | NEG            | 0             | 0      |      |               |  |                                          |  |      |  |      |  |      |  |      |  |      |  |      |  |      |  |      |  |      |  |      |  |      |  |      |  |       |  |       |  |       |  |       |  |       |  |       |  |       |  |       |  |       |  |       |  |       |  |       |  |       |  |       |  |       |  |       |  |       |  |       |  |       |  |       |  |       |  |       |  |       |  |       |  |       |  |       |  |       |  |       |  |       |  |       |  |       |  |       |  |       |  |       |  |       |  |       |  |       |  |       |  |       |  |       |  |       |  |       |  |       |  |       |  |       |  |       |  |       |  |       |  |       |  |       |  |       |  |       |  |       |  |       |  |       |  |       |  |       |  |       |  |       |  |       |  |       |  |       |  |       |  |       |  |       |  |       |  |       |  |       |  |       |  |       |  |       |  |       |  |       |  |       |  |       |  |       |  |       |  |       |  |       |  |       |  |       |  |       |  |       |  |       |  |       |  |       |  |       |  |       |  |       |  |       |  |       |  |       |  |       |  |       |  |       |  |       |  |       |  |       |  |       |  |       |  |       |  |       |  |       |  |       |  |       |  |       |  |       |  |       |  |       |  |       |  |       |  |       |  |       |  |       |  |       |  |       |  |       |  |       |  |       |  |       |  |       |  |       |  |       |  |       |  |       |  |       |  |       |  |       |  |       |  |       |  |       |  |       |  |       |  |       |  |       |  |       |  |       |  |       |  |       |  |       |  |       |  |       |  |       |  |       |  |       |  |       |  |       |  |       |  |       |  |       |  |       |  |       |  |       |  |       |  |       |  |       |  |       |  |       |  |       |  |       |  |       |  |       |  |       |  |       |  |       |  |       |  |       |  |       |  |       |  |       |  |       |  |       |  |       |  |       |  |       |  |       |  |       |  |       |  |       |  |       |  |       |  |       |  |       |  |       |  |       |  |       |  |       |  |       |  |       |  |       |  |       |  |       |  |       |  |       |  |       |  |       |  |       |  |       |  |       |  |       |  |       |  |       |  |       |  |       |  |       |  |       |  |       |  |       |  |       |  |       |  |       |  |       |  |       |  |       |  |       |  |       |  |       |  |       |  |       |  |       |  |       |  |       |  |       |  |       |  |       |  |       |  |       |  |       |  |       |  |       |  |       |  |       |  |       |  |       |  |       |  |       |  |       |  |       |  |       |  |       |  |       |  |       |  |       |  |       |  |       |  |       |  |       |  |       |  |       |  |       |  |       |  |       |  |       |  |       |  |       |  |       |  |       |  |       |  |       |  |       |  |       |  |       |  |       |  |       |  |       |  |       |  |       |  |       |  |       |  |       |  |       |  |       |  |       |  |       |  |       |  |       |  |       |  |       |  |       |  |       |  |       |  |       |  |       |  |       |  |       |  |       |  |       |  |       |  |       |  |       |  |       |  |       |  |       |  |       |  |       |  |       |  |       |  |       |  |       |  |       |  |       |  |       |  |       |  |       |  |       |  |       |  |       |  |       |  |       |  |       |  |       |  |       |  |       |  |       |  |       |  |       |  |       |  |       |  |       |  |       |  |       |  |       |  |       |  |       |  |       |  |       |  |       |  |       |  |       |  |       |  |       |  |       |  |       |  |       |  |       |  |       |  |       |  |       |  |       |  |       |  |       |  |       |  |       |  |       |  |       |  |       |  |       |  |       |  |       |  |       |  |       |  |       |  |       |  |       |  |       |  |       |  |       |  |       |  |       |  |       |  |       |  |       |  |       |  |       |  |       |  |       |  |       |  |       |  |       |  |       |  |       |  |       |  |       |  |       |  |       |  |       |  |       |  |       |  |       |  |       |  |       |  |       |  |       |  |       |  |       |  |       |  |       |  |       |  |       |  |       |  |       |  |       |  |       |  |       |  |       |  |       |  |       |  |       |  |       |  |       |  |       |  |       |  |       |  |       |  |       |  |       |  |       |  |       |  |       |  |       |  |       |  |       |  |       |  |       |  |       |  |       |  |       |  |       |  |       |  |       |  |       |  |       |  |       |  |       |  |       |  |       |  |       |  |       |  |       |  |       |  |       |  |       |  |       |  |       |  |       |  |       |  |       |  |       |  |       |  |       |  |       |  |       |  |       |  |       |  |       |  |       |  |       |  |       |  |       |  |       |  |       |  |       |  |       |  |       |  |       |  |       |  |       |  |       |  |       |  |       |  |       |  |       |  |       |  |       |  |       |  |       |  |       |  |       |  |       |  |       |  |       |  |       |  |       |  |       |  |       |  |       |  |       |  |       |  |       |  |       |  |       |  |       |  |       |  |       |  |       |  |       |  |       |  |       |  |       |  |       |  |       |  |       |  |       |  |       |  |       |  |       |  |       |  |       |  |       |  |       |  |       |  |       |  |       |  |       |  |       |  |       |  |       |  |       |  |       |  |       |  |       |  |       |  |       |  |       |  |       |  |       |  |       |  |       |  |       |  |       |  |       |  |       |  |       |  |       |  |       |  |       |  |       |  |       |  |       |  |       |  |       |  |       |  |       |  |       |  |       |  |       |  |       |  |       |  |       |  |       |  |       |  |       |  |       |  |       |  |       |  |       |  |       |  |       |  |       |  |       |  |       |  |       |  |       |  |       |  |       |  |       |  |       |  |       |  |       |  |       |  |       |  |       |  |       |  |       |  |       |  |       |  |       |  |       |  |       |  |       |  |       |  |       |  |       |  |       |  |       |  |       |  |       |  |       |  |       |  |       |  |       |  |       |  |       |  |       |  |       |  |       |  |       |  |       |  |       |  |       |  |       |  |       |  |       |  |       |  |       |  |       |  |       |  |       |  |       |  |       |  |       |  |       |  |       |  |       |  |       |  |       |  |       |  |       |  |       |  |       |  |       |  |       |  |       |  |       |  |       |  |       |  |       |  |       |  |       |  |       |  |       |  |       |  |       |  |       |  |       |  |       |  |       |  |       |  |       |  |       |  |       |  |       |  |       |  |       |  |       |  |       |  |       |  |       |  |       |  |       |  |       |  |       |  |       |  |       |  |       |  |       |  |       |  |       |  |       |  |       |  |       |  |       |  |       |  |       |  |       |  |       |  |       |  |       |  |       |  |       |  |       |  |       |  |       |  |       |  |       |  |       |  |       |  |       |  |       |  |       |  |       |  |       |  |       |  |
| 203233     | CC0091                    | CC1-MSSA                      | NEG                                      | NEG        | NEG          | NEG       | AMB    | NEG          | NEG       | NEG      | NEG      | NEG      | NEG      | NEG      | NEG      | NEG      | NEG    | NEG  | NEG    | NEG                      | NEG                      | NEG            | NEG                      | NEG                      | NEG            | 0             | 0      |      |               |  |                                          |  |      |  |      |  |      |  |      |  |      |  |      |  |      |  |      |  |      |  |      |  |      |  |      |  |       |  |       |  |       |  |       |  |       |  |       |  |       |  |       |  |       |  |       |  |       |  |       |  |       |  |       |  |       |  |       |  |       |  |       |  |       |  |       |  |       |  |       |  |       |  |       |  |       |  |       |  |       |  |       |  |       |  |       |  |       |  |       |  |       |  |       |  |       |  |       |  |       |  |       |  |       |  |       |  |       |  |       |  |       |  |       |  |       |  |       |  |       |  |       |  |       |  |       |  |       |  |       |  |       |  |       |  |       |  |       |  |       |  |       |  |       |  |       |  |       |  |       |  |       |  |       |  |       |  |       |  |       |  |       |  |       |  |       |  |       |  |       |  |       |  |       |  |       |  |       |  |       |  |       |  |       |  |       |  |       |  |       |  |       |  |       |  |       |  |       |  |       |  |       |  |       |  |       |  |       |  |       |  |       |  |       |  |       |  |       |  |       |  |       |  |       |  |       |  |       |  |       |  |       |  |       |  |       |  |       |  |       |  |       |  |       |  |       |  |       |  |       |  |       |  |       |  |       |  |       |  |       |  |       |  |       |  |       |  |       |  |       |  |       |  |       |  |       |  |       |  |       |  |       |  |       |  |       |  |       |  |       |  |       |  |       |  |       |  |       |  |       |  |       |  |       |  |       |  |       |  |       |  |       |  |       |  |       |  |       |  |       |  |       |  |       |  |       |  |       |  |       |  |       |  |       |  |       |  |       |  |       |  |       |  |       |  |       |  |       |  |       |  |       |  |       |  |       |  |       |  |       |  |       |  |       |  |       |  |       |  |       |  |       |  |       |  |       |  |       |  |       |  |       |  |       |  |       |  |       |  |       |  |       |  |       |  |       |  |       |  |       |  |       |  |       |  |       |  |       |  |       |  |       |  |       |  |       |  |       |  |       |  |       |  |       |  |       |  |       |  |       |  |       |  |       |  |       |  |       |  |       |  |       |  |       |  |       |  |       |  |       |  |       |  |       |  |       |  |       |  |       |  |       |  |       |  |       |  |       |  |       |  |       |  |       |  |       |  |       |  |       |  |       |  |       |  |       |  |       |  |       |  |       |  |       |  |       |  |       |  |       |  |       |  |       |  |       |  |       |  |       |  |       |  |       |  |       |  |       |  |       |  |       |  |       |  |       |  |       |  |       |  |       |  |       |  |       |  |       |  |       |  |       |  |       |  |       |  |       |  |       |  |       |  |       |  |       |  |       |  |       |  |       |  |       |  |       |  |       |  |       |  |       |  |       |  |       |  |       |  |       |  |       |  |       |  |       |  |       |  |       |  |       |  |       |  |       |  |       |  |       |  |       |  |       |  |       |  |       |  |       |  |       |  |       |  |       |  |       |  |       |  |       |  |       |  |       |  |       |  |       |  |       |  |       |  |       |  |       |  |       |  |       |  |       |  |       |  |       |  |       |  |       |  |       |  |       |  |       |  |       |  |       |  |       |  |       |  |       |  |       |  |       |  |       |  |       |  |       |  |       |  |       |  |       |  |       |  |       |  |       |  |       |  |       |  |       |  |       |  |       |  |       |  |       |  |       |  |       |  |       |  |       |  |       |  |       |  |       |  |       |  |       |  |       |  |       |  |       |  |       |  |       |  |       |  |       |  |       |  |       |  |       |  |       |  |       |  |       |  |       |  |       |  |       |  |       |  |       |  |       |  |       |  |       |  |       |  |       |  |       |  |       |  |       |  |       |  |       |  |       |  |       |  |       |  |       |  |       |  |       |  |       |  |       |  |       |  |       |  |       |  |       |  |       |  |       |  |       |  |       |  |       |  |       |  |       |  |       |  |       |  |       |  |       |  |       |  |       |  |       |  |       |  |       |  |       |  |       |  |       |  |       |  |       |  |       |  |       |  |       |  |       |  |       |  |       |  |       |  |       |  |       |  |       |  |       |  |       |  |       |  |       |  |       |  |       |  |       |  |       |  |       |  |       |  |       |  |       |  |       |  |       |  |       |  |       |  |       |  |       |  |       |  |       |  |       |  |       |  |       |  |       |  |       |  |       |  |       |  |       |  |       |  |       |  |       |  |       |  |       |  |       |  |       |  |       |  |       |  |       |  |       |  |       |  |       |  |       |  |       |  |       |  |       |  |       |  |       |  |       |  |       |  |       |  |       |  |       |  |       |  |       |  |       |  |       |  |       |  |       |  |       |  |       |  |       |  |       |  |       |  |       |  |       |  |       |  |       |  |       |  |       |  |       |  |       |  |       |  |       |  |       |  |       |  |       |  |       |  |       |  |       |  |       |  |       |  |       |  |       |  |       |  |       |  |       |  |       |  |       |  |       |  |       |  |       |  |       |  |       |  |       |  |       |  |       |  |       |  |       |  |       |  |       |  |       |  |       |  |       |  |       |  |       |  |       |  |       |  |       |  |       |  |       |  |       |  |       |  |       |  |       |  |       |  |       |  |       |  |       |  |       |  |       |  |       |  |       |  |       |  |       |  |       |  |       |  |       |  |       |  |       |  |       |  |       |  |       |  |       |  |       |  |       |  |       |  |       |  |       |  |       |  |       |  |       |  |       |  |       |  |       |  |       |  |       |  |       |  |       |  |       |  |       |  |       |  |       |  |       |  |       |  |       |  |       |  |       |  |       |  |       |  |       |  |       |  |       |  |       |  |       |  |       |  |       |  |       |  |       |  |       |  |       |  |       |  |       |  |       |  |       |  |       |  |       |  |       |  |       |  |       |  |       |  |       |  |       |  |       |  |       |  |       |  |       |  |       |  |       |  |       |  |       |  |       |  |       |  |       |  |       |  |       |  |       |  |       |  |       |  |       |  |       |  |       |  |       |  |       |  |       |  |       |  |       |  |       |  |       |  |       |  |       |  |       |  |       |  |       |  |       |  |       |  |       |  |       |  |       |  |       |  |       |  |       |  |       |  |       |  |       |  |       |  |       |  |       |  |       |  |       |  |       |  |       |  |       |  |       |  |       |  |       |  |       |  |       |  |       |  |       |  |       |  |       |  |       |  |       |  |       |  |       |  |       |  |       |  |       |  |       |  |       |  |       |  |       |  |       |  |       |  |
| 203234     | CC0091                    | CC1-MSSA                      | NEG                                      | NEG        | NEG          | NEG       | AMB    | NEG          | NEG       | NEG      | NEG      | NEG      | NEG      | NEG      | NEG      | NEG      | NEG    | NEG  | NEG    | NEG                      | NEG                      | NEG            | NEG                      | NEG                      | NEG            | 0             | 0      |      |               |  |                                          |  |      |  |      |  |      |  |      |  |      |  |      |  |      |  |      |  |      |  |      |  |      |  |      |  |       |  |       |  |       |  |       |  |       |  |       |  |       |  |       |  |       |  |       |  |       |  |       |  |       |  |       |  |       |  |       |  |       |  |       |  |       |  |       |  |       |  |       |  |       |  |       |  |       |  |       |  |       |  |       |  |       |  |       |  |       |  |       |  |       |  |       |  |       |  |       |  |       |  |       |  |       |  |       |  |       |  |       |  |       |  |       |  |       |  |       |  |       |  |       |  |       |  |       |  |       |  |       |  |       |  |       |  |       |  |       |  |       |  |       |  |       |  |       |  |       |  |       |  |       |  |       |  |       |  |       |  |       |  |       |  |       |  |       |  |       |  |       |  |       |  |       |  |       |  |       |  |       |  |       |  |       |  |       |  |       |  |       |  |       |  |       |  |       |  |       |  |       |  |       |  |       |  |       |  |       |  |       |  |       |  |       |  |       |  |       |  |       |  |       |  |       |  |       |  |       |  |       |  |       |  |       |  |       |  |       |  |       |  |       |  |       |  |       |  |       |  |       |  |       |  |       |  |       |  |       |  |       |  |       |  |       |  |       |  |       |  |       |  |       |  |       |  |       |  |       |  |       |  |       |  |       |  |       |  |       |  |       |  |       |  |       |  |       |  |       |  |       |  |       |  |       |  |       |  |       |  |       |  |       |  |       |  |       |  |       |  |       |  |       |  |       |  |       |  |       |  |       |  |       |  |       |  |       |  |       |  |       |  |       |  |       |  |       |  |       |  |       |  |       |  |       |  |       |  |       |  |       |  |       |  |       |  |       |  |       |  |       |  |       |  |       |  |       |  |       |  |       |  |       |  |       |  |       |  |       |  |       |  |       |  |       |  |       |  |       |  |       |  |       |  |       |  |       |  |       |  |       |  |       |  |       |  |       |  |       |  |       |  |       |  |       |  |       |  |       |  |       |  |       |  |       |  |       |  |       |  |       |  |       |  |       |  |       |  |       |  |       |  |       |  |       |  |       |  |       |  |       |  |       |  |       |  |       |  |       |  |       |  |       |  |       |  |       |  |       |  |       |  |       |  |       |  |       |  |       |  |       |  |       |  |       |  |       |  |       |  |       |  |       |  |       |  |       |  |       |  |       |  |       |  |       |  |       |  |       |  |       |  |       |  |       |  |       |  |       |  |       |  |       |  |       |  |       |  |       |  |       |  |       |  |       |  |       |  |       |  |       |  |       |  |       |  |       |  |       |  |       |  |       |  |       |  |       |  |       |  |       |  |       |  |       |  |       |  |       |  |       |  |       |  |       |  |       |  |       |  |       |  |       |  |       |  |       |  |       |  |       |  |       |  |       |  |       |  |       |  |       |  |       |  |       |  |       |  |       |  |       |  |       |  |       |  |       |  |       |  |       |  |       |  |       |  |       |  |       |  |       |  |       |  |       |  |       |  |       |  |       |  |       |  |       |  |       |  |       |  |       |  |       |  |       |  |       |  |       |  |       |  |       |  |       |  |       |  |       |  |       |  |       |  |       |  |       |  |       |  |       |  |       |  |       |  |       |  |       |  |       |  |       |  |       |  |       |  |       |  |       |  |       |  |       |  |       |  |       |  |       |  |       |  |       |  |       |  |       |  |       |  |       |  |       |  |       |  |       |  |       |  |       |  |       |  |       |  |       |  |       |  |       |  |       |  |       |  |       |  |       |  |       |  |       |  |       |  |       |  |       |  |       |  |       |  |       |  |       |  |       |  |       |  |       |  |       |  |       |  |       |  |       |  |       |  |       |  |       |  |       |  |       |  |       |  |       |  |       |  |       |  |       |  |       |  |       |  |       |  |       |  |       |  |       |  |       |  |       |  |       |  |       |  |       |  |       |  |       |  |       |  |       |  |       |  |       |  |       |  |       |  |       |  |       |  |       |  |       |  |       |  |       |  |       |  |       |  |       |  |       |  |       |  |       |  |       |  |       |  |       |  |       |  |       |  |       |  |       |  |       |  |       |  |       |  |       |  |       |  |       |  |       |  |       |  |       |  |       |  |       |  |       |  |       |  |       |  |       |  |       |  |       |  |       |  |       |  |       |  |       |  |       |  |       |  |       |  |       |  |       |  |       |  |       |  |       |  |       |  |       |  |       |  |       |  |       |  |       |  |       |  |       |  |       |  |       |  |       |  |       |  |       |  |       |  |       |  |       |  |       |  |       |  |       |  |       |  |       |  |       |  |       |  |       |  |       |  |       |  |       |  |       |  |       |  |       |  |       |  |       |  |       |  |       |  |       |  |       |  |       |  |       |  |       |  |       |  |       |  |       |  |       |  |       |  |       |  |       |  |       |  |       |  |       |  |       |  |       |  |       |  |       |  |       |  |       |  |       |  |       |  |       |  |       |  |       |  |       |  |       |  |       |  |       |  |       |  |       |  |       |  |       |  |       |  |       |  |       |  |       |  |       |  |       |  |       |  |       |  |       |  |       |  |       |  |       |  |       |  |       |  |       |  |       |  |       |  |       |  |       |  |       |  |       |  |       |  |       |  |       |  |       |  |       |  |       |  |       |  |       |  |       |  |       |  |       |  |       |  |       |  |       |  |       |  |       |  |       |  |       |  |       |  |       |  |       |  |       |  |       |  |       |  |       |  |       |  |       |  |       |  |       |  |       |  |       |  |       |  |       |  |       |  |       |  |       |  |       |  |       |  |       |  |       |  |       |  |       |  |       |  |       |  |       |  |       |  |       |  |       |  |       |  |       |  |       |  |       |  |       |  |       |  |       |  |       |  |       |  |       |  |       |  |       |  |       |  |       |  |       |  |       |  |       |  |       |  |       |  |       |  |       |  |       |  |       |  |       |  |       |  |       |  |       |  |       |  |       |  |       |  |       |  |       |  |       |  |       |  |       |  |       |  |       |  |       |  |       |  |       |  |       |  |       |  |       |  |       |  |       |  |       |  |       |  |       |  |       |  |       |  |       |  |       |  |       |  |       |  |       |  |       |  |       |  |       |  |       |  |       |  |       |  |       |  |       |  |       |  |       |  |       |  |       |  |       |  |       |  |       |  |       |  |       |  |       |  |       |  |       |  |       |  |
| 203235     | CC0091                    | CC1-MSSA                      | NEG                                      | NEG        | NEG          | NEG       | AMB    | NEG          | NEG       | NEG      | NEG      | NEG      | NEG      | NEG      | NEG      | NEG      | NEG    | NEG  | NEG    | NEG                      | NEG                      | NEG            | NEG                      | NEG                      | NEG            | 0             | 0      |      |               |  |                                          |  |      |  |      |  |      |  |      |  |      |  |      |  |      |  |      |  |      |  |      |  |      |  |      |  |       |  |       |  |       |  |       |  |       |  |       |  |       |  |       |  |       |  |       |  |       |  |       |  |       |  |       |  |       |  |       |  |       |  |       |  |       |  |       |  |       |  |       |  |       |  |       |  |       |  |       |  |       |  |       |  |       |  |       |  |       |  |       |  |       |  |       |  |       |  |       |  |       |  |       |  |       |  |       |  |       |  |       |  |       |  |       |  |       |  |       |  |       |  |       |  |       |  |       |  |       |  |       |  |       |  |       |  |       |  |       |  |       |  |       |  |       |  |       |  |       |  |       |  |       |  |       |  |       |  |       |  |       |  |       |  |       |  |       |  |       |  |       |  |       |  |       |  |       |  |       |  |       |  |       |  |       |  |       |  |       |  |       |  |       |  |       |  |       |  |       |  |       |  |       |  |       |  |       |  |       |  |       |  |       |  |       |  |       |  |       |  |       |  |       |  |       |  |       |  |       |  |       |  |       |  |       |  |       |  |       |  |       |  |       |  |       |  |       |  |       |  |       |  |       |  |       |  |       |  |       |  |       |  |       |  |       |  |       |  |       |  |       |  |       |  |       |  |       |  |       |  |       |  |       |  |       |  |       |  |       |  |       |  |       |  |       |  |       |  |       |  |       |  |       |  |       |  |       |  |       |  |       |  |       |  |       |  |       |  |       |  |       |  |       |  |       |  |       |  |       |  |       |  |       |  |       |  |       |  |       |  |       |  |       |  |       |  |       |  |       |  |       |  |       |  |       |  |       |  |       |  |       |  |       |  |       |  |       |  |       |  |       |  |       |  |       |  |       |  |       |  |       |  |       |  |       |  |       |  |       |  |       |  |       |  |       |  |       |  |       |  |       |  |       |  |       |  |       |  |       |  |       |  |       |  |       |  |       |  |       |  |       |  |       |  |       |  |       |  |       |  |       |  |       |  |       |  |       |  |       |  |       |  |       |  |       |  |       |  |       |  |       |  |       |  |       |  |       |  |       |  |       |  |       |  |       |  |       |  |       |  |       |  |       |  |       |  |       |  |       |  |       |  |       |  |       |  |       |  |       |  |       |  |       |  |       |  |       |  |       |  |       |  |       |  |       |  |       |  |       |  |       |  |       |  |       |  |       |  |       |  |       |  |       |  |       |  |       |  |       |  |       |  |       |  |       |  |       |  |       |  |       |  |       |  |       |  |       |  |       |  |       |  |       |  |       |  |       |  |       |  |       |  |       |  |       |  |       |  |       |  |       |  |       |  |       |  |       |  |       |  |       |  |       |  |       |  |       |  |       |  |       |  |       |  |       |  |       |  |       |  |       |  |       |  |       |  |       |  |       |  |       |  |       |  |       |  |       |  |       |  |       |  |       |  |       |  |       |  |       |  |       |  |       |  |       |  |       |  |       |  |       |  |       |  |       |  |       |  |       |  |       |  |       |  |       |  |       |  |       |  |       |  |       |  |       |  |       |  |       |  |       |  |       |  |       |  |       |  |       |  |       |  |       |  |       |  |       |  |       |  |       |  |       |  |       |  |       |  |       |  |       |  |       |  |       |  |       |  |       |  |       |  |       |  |       |  |       |  |       |  |       |  |       |  |       |  |       |  |       |  |       |  |       |  |       |  |       |  |       |  |       |  |       |  |       |  |       |  |       |  |       |  |       |  |       |  |       |  |       |  |       |  |       |  |       |  |       |  |       |  |       |  |       |  |       |  |       |  |       |  |       |  |       |  |       |  |       |  |       |  |       |  |       |  |       |  |       |  |       |  |       |  |       |  |       |  |       |  |       |  |       |  |       |  |       |  |       |  |       |  |       |  |       |  |       |  |       |  |       |  |       |  |       |  |       |  |       |  |       |  |       |  |       |  |       |  |       |  |       |  |       |  |       |  |       |  |       |  |       |  |       |  |       |  |       |  |       |  |       |  |       |  |       |  |       |  |       |  |       |  |       |  |       |  |       |  |       |  |       |  |       |  |       |  |       |  |       |  |       |  |       |  |       |  |       |  |       |  |       |  |       |  |       |  |       |  |       |  |       |  |       |  |       |  |       |  |       |  |       |  |       |  |       |  |       |  |       |  |       |  |       |  |       |  |       |  |       |  |       |  |       |  |       |  |       |  |       |  |       |  |       |  |       |  |       |  |       |  |       |  |       |  |       |  |       |  |       |  |       |  |       |  |       |  |       |  |       |  |       |  |       |  |       |  |       |  |       |  |       |  |       |  |       |  |       |  |       |  |       |  |       |  |       |  |       |  |       |  |       |  |       |  |       |  |       |  |       |  |       |  |       |  |       |  |       |  |       |  |       |  |       |  |       |  |       |  |       |  |       |  |       |  |       |  |       |  |       |  |       |  |       |  |       |  |       |  |       |  |       |  |       |  |       |  |       |  |       |  |       |  |       |  |       |  |       |  |       |  |       |  |       |  |       |  |       |  |       |  |       |  |       |  |       |  |       |  |       |  |       |  |       |  |       |  |       |  |       |  |       |  |       |  |       |  |       |  |       |  |       |  |       |  |       |  |       |  |       |  |       |  |       |  |       |  |       |  |       |  |       |  |       |  |       |  |       |  |       |  |       |  |       |  |       |  |       |  |       |  |       |  |       |  |       |  |       |  |       |  |       |  |       |  |       |  |       |  |       |  |       |  |       |  |       |  |       |  |       |  |       |  |       |  |       |  |       |  |       |  |       |  |       |  |       |  |       |  |       |  |       |  |       |  |       |  |       |  |       |  |       |  |       |  |       |  |       |  |       |  |       |  |       |  |       |  |       |  |       |  |       |  |       |  |       |  |       |  |       |  |       |  |       |  |       |  |       |  |       |  |       |  |       |  |       |  |       |  |       |  |       |  |       |  |       |  |       |  |       |  |       |  |       |  |       |  |       |  |       |  |       |  |       |  |       |  |       |  |       |  |       |  |       |  |       |  |       |  |       |  |       |  |       |  |       |  |       |  |       |  |       |  |       |  |       |  |       |  |       |  |       |  |       |  |       |  |       |  |       |  |       |  |       |  |       |  |       |  |       |  |       |  |       |  |       |  |       |  |       |  |       |  |       |  |       |  |
| 203236     | CC0091                    | CC1-MSSA                      | NEG                                      | NEG        | NEG          | NEG       | AMB    | NEG          | NEG       | NEG      | NEG      | NEG      | NEG      | NEG      | NEG      | NEG      | NEG    | NEG  | NEG    | NEG                      | NEG                      | NEG            | NEG                      | NEG                      | NEG            | 0             | 0      |      |               |  |                                          |  |      |  |      |  |      |  |      |  |      |  |      |  |      |  |      |  |      |  |      |  |      |  |      |  |       |  |       |  |       |  |       |  |       |  |       |  |       |  |       |  |       |  |       |  |       |  |       |  |       |  |       |  |       |  |       |  |       |  |       |  |       |  |       |  |       |  |       |  |       |  |       |  |       |  |       |  |       |  |       |  |       |  |       |  |       |  |       |  |       |  |       |  |       |  |       |  |       |  |       |  |       |  |       |  |       |  |       |  |       |  |       |  |       |  |       |  |       |  |       |  |       |  |       |  |       |  |       |  |       |  |       |  |       |  |       |  |       |  |       |  |       |  |       |  |       |  |       |  |       |  |       |  |       |  |       |  |       |  |       |  |       |  |       |  |       |  |       |  |       |  |       |  |       |  |       |  |       |  |       |  |       |  |       |  |       |  |       |  |       |  |       |  |       |  |       |  |       |  |       |  |       |  |       |  |       |  |       |  |       |  |       |  |       |  |       |  |       |  |       |  |       |  |       |  |       |  |       |  |       |  |       |  |       |  |       |  |       |  |       |  |       |  |       |  |       |  |       |  |       |  |       |  |       |  |       |  |       |  |       |  |       |  |       |  |       |  |       |  |       |  |       |  |       |  |       |  |       |  |       |  |       |  |       |  |       |  |       |  |       |  |       |  |       |  |       |  |       |  |       |  |       |  |       |  |       |  |       |  |       |  |       |  |       |  |       |  |       |  |       |  |       |  |       |  |       |  |       |  |       |  |       |  |       |  |       |  |       |  |       |  |       |  |       |  |       |  |       |  |       |  |       |  |       |  |       |  |       |  |       |  |       |  |       |  |       |  |       |  |       |  |       |  |       |  |       |  |       |  |       |  |       |  |       |  |       |  |       |  |       |  |       |  |       |  |       |  |       |  |       |  |       |  |       |  |       |  |       |  |       |  |       |  |       |  |       |  |       |  |       |  |       |  |       |  |       |  |       |  |       |  |       |  |       |  |       |  |       |  |       |  |       |  |       |  |       |  |       |  |       |  |       |  |       |  |       |  |       |  |       |  |       |  |       |  |       |  |       |  |       |  |       |  |       |  |       |  |       |  |       |  |       |  |       |  |       |  |       |  |       |  |       |  |       |  |       |  |       |  |       |  |       |  |       |  |       |  |       |  |       |  |       |  |       |  |       |  |       |  |       |  |       |  |       |  |       |  |       |  |       |  |       |  |       |  |       |  |       |  |       |  |       |  |       |  |       |  |       |  |       |  |       |  |       |  |       |  |       |  |       |  |       |  |       |  |       |  |       |  |       |  |       |  |       |  |       |  |       |  |       |  |       |  |       |  |       |  |       |  |       |  |       |  |       |  |       |  |       |  |       |  |       |  |       |  |       |  |       |  |       |  |       |  |       |  |       |  |       |  |       |  |       |  |       |  |       |  |       |  |       |  |       |  |       |  |       |  |       |  |       |  |       |  |       |  |       |  |       |  |       |  |       |  |       |  |       |  |       |  |       |  |       |  |       |  |       |  |       |  |       |  |       |  |       |  |       |  |       |  |       |  |       |  |       |  |       |  |       |  |       |  |       |  |       |  |       |  |       |  |       |  |       |  |       |  |       |  |       |  |       |  |       |  |       |  |       |  |       |  |       |  |       |  |       |  |       |  |       |  |       |  |       |  |       |  |       |  |       |  |       |  |       |  |       |  |       |  |       |  |       |  |       |  |       |  |       |  |       |  |       |  |       |  |       |  |       |  |       |  |       |  |       |  |       |  |       |  |       |  |       |  |       |  |       |  |       |  |       |  |       |  |       |  |       |  |       |  |       |  |       |  |       |  |       |  |       |  |       |  |       |  |       |  |       |  |       |  |       |  |       |  |       |  |       |  |       |  |       |  |       |  |       |  |       |  |       |  |       |  |       |  |       |  |       |  |       |  |       |  |       |  |       |  |       |  |       |  |       |  |       |  |       |  |       |  |       |  |       |  |       |  |       |  |       |  |       |  |       |  |       |  |       |  |       |  |       |  |       |  |       |  |       |  |       |  |       |  |       |  |       |  |       |  |       |  |       |  |       |  |       |  |       |  |       |  |       |  |       |  |       |  |       |  |       |  |       |  |       |  |       |  |       |  |       |  |       |  |       |  |       |  |       |  |       |  |       |  |       |  |       |  |       |  |       |  |       |  |       |  |       |  |       |  |       |  |       |  |       |  |       |  |       |  |       |  |       |  |       |  |       |  |       |  |       |  |       |  |       |  |       |  |       |  |       |  |       |  |       |  |       |  |       |  |       |  |       |  |       |  |       |  |       |  |       |  |       |  |       |  |       |  |       |  |       |  |       |  |       |  |       |  |       |  |       |  |       |  |       |  |       |  |       |  |       |  |       |  |       |  |       |  |       |  |       |  |       |  |       |  |       |  |       |  |       |  |       |  |       |  |       |  |       |  |       |  |       |  |       |  |       |  |       |  |       |  |       |  |       |  |       |  |       |  |       |  |       |  |       |  |       |  |       |  |       |  |       |  |       |  |       |  |       |  |       |  |       |  |       |  |       |  |       |  |       |  |       |  |       |  |       |  |       |  |       |  |       |  |       |  |       |  |       |  |       |  |       |  |       |  |       |  |       |  |       |  |       |  |       |  |       |  |       |  |       |  |       |  |       |  |       |  |       |  |       |  |       |  |       |  |       |  |       |  |       |  |       |  |       |  |       |  |       |  |       |  |       |  |       |  |       |  |       |  |       |  |       |  |       |  |       |  |       |  |       |  |       |  |       |  |       |  |       |  |       |  |       |  |       |  |       |  |       |  |       |  |       |  |       |  |       |  |       |  |       |  |       |  |       |  |       |  |       |  |       |  |       |  |       |  |       |  |       |  |       |  |       |  |       |  |       |  |       |  |       |  |       |  |       |  |       |  |       |  |       |  |       |  |       |  |       |  |       |  |       |  |       |  |       |  |       |  |       |  |       |  |       |  |       |  |       |  |       |  |       |  |       |  |       |  |       |  |       |  |       |  |       |  |       |  |       |  |       |  |       |  |       |  |       |  |       |  |       |  |       |  |       |  |       |  |       |  |       |  |       |  |       |  |       |  |       |  |       |  |       |  |       |  |       |  |       |  |
| 203237     | CC0091                    | CC1-MSSA                      | NEG                                      | NEG        | NEG          | NEG       | AMB    | NEG          | NEG       | NEG      | NEG      | NEG      | NEG      | NEG      | NEG      | NEG      | NEG    | NEG  | NEG    | NEG                      | NEG                      | NEG            | NEG                      | NEG                      | NEG            | 0             | 0      |      |               |  |                                          |  |      |  |      |  |      |  |      |  |      |  |      |  |      |  |      |  |      |  |      |  |      |  |      |  |       |  |       |  |       |  |       |  |       |  |       |  |       |  |       |  |       |  |       |  |       |  |       |  |       |  |       |  |       |  |       |  |       |  |       |  |       |  |       |  |       |  |       |  |       |  |       |  |       |  |       |  |       |  |       |  |       |  |       |  |       |  |       |  |       |  |       |  |       |  |       |  |       |  |       |  |       |  |       |  |       |  |       |  |       |  |       |  |       |  |       |  |       |  |       |  |       |  |       |  |       |  |       |  |       |  |       |  |       |  |       |  |       |  |       |  |       |  |       |  |       |  |       |  |       |  |       |  |       |  |       |  |       |  |       |  |       |  |       |  |       |  |       |  |       |  |       |  |       |  |       |  |       |  |       |  |       |  |       |  |       |  |       |  |       |  |       |  |       |  |       |  |       |  |       |  |       |  |       |  |       |  |       |  |       |  |       |  |       |  |       |  |       |  |       |  |       |  |       |  |       |  |       |  |       |  |       |  |       |  |       |  |       |  |       |  |       |  |       |  |       |  |       |  |       |  |       |  |       |  |       |  |       |  |       |  |       |  |       |  |       |  |       |  |       |  |       |  |       |  |       |  |       |  |       |  |       |  |       |  |       |  |       |  |       |  |       |  |       |  |       |  |       |  |       |  |       |  |       |  |       |  |       |  |       |  |       |  |       |  |       |  |       |  |       |  |       |  |       |  |       |  |       |  |       |  |       |  |       |  |       |  |       |  |       |  |       |  |       |  |       |  |       |  |       |  |       |  |       |  |       |  |       |  |       |  |       |  |       |  |       |  |       |  |       |  |       |  |       |  |       |  |       |  |       |  |       |  |       |  |       |  |       |  |       |  |       |  |       |  |       |  |       |  |       |  |       |  |       |  |       |  |       |  |       |  |       |  |       |  |       |  |       |  |       |  |       |  |       |  |       |  |       |  |       |  |       |  |       |  |       |  |       |  |       |  |       |  |       |  |       |  |       |  |       |  |       |  |       |  |       |  |       |  |       |  |       |  |       |  |       |  |       |  |       |  |       |  |       |  |       |  |       |  |       |  |       |  |       |  |       |  |       |  |       |  |       |  |       |  |       |  |       |  |       |  |       |  |       |  |       |  |       |  |       |  |       |  |       |  |       |  |       |  |       |  |       |  |       |  |       |  |       |  |       |  |       |  |       |  |       |  |       |  |       |  |       |  |       |  |       |  |       |  |       |  |       |  |       |  |       |  |       |  |       |  |       |  |       |  |       |  |       |  |       |  |       |  |       |  |       |  |       |  |       |  |       |  |       |  |       |  |       |  |       |  |       |  |       |  |       |  |       |  |       |  |       |  |       |  |       |  |       |  |       |  |       |  |       |  |       |  |       |  |       |  |       |  |       |  |       |  |       |  |       |  |       |  |       |  |       |  |       |  |       |  |       |  |       |  |       |  |       |  |       |  |       |  |       |  |       |  |       |  |       |  |       |  |       |  |       |  |       |  |       |  |       |  |       |  |       |  |       |  |       |  |       |  |       |  |       |  |       |  |       |  |       |  |       |  |       |  |       |  |       |  |       |  |       |  |       |  |       |  |       |  |       |  |       |  |       |  |       |  |       |  |       |  |       |  |       |  |       |  |       |  |       |  |       |  |       |  |       |  |       |  |       |  |       |  |       |  |       |  |       |  |       |  |       |  |       |  |       |  |       |  |       |  |       |  |       |  |       |  |       |  |       |  |       |  |       |  |       |  |       |  |       |  |       |  |       |  |       |  |       |  |       |  |       |  |       |  |       |  |       |  |       |  |       |  |       |  |       |  |       |  |       |  |       |  |       |  |       |  |       |  |       |  |       |  |       |  |       |  |       |  |       |  |       |  |       |  |       |  |       |  |       |  |       |  |       |  |       |  |       |  |       |  |       |  |       |  |       |  |       |  |       |  |       |  |       |  |       |  |       |  |       |  |       |  |       |  |       |  |       |  |       |  |       |  |       |  |       |  |       |  |       |  |       |  |       |  |       |  |       |  |       |  |       |  |       |  |       |  |       |  |       |  |       |  |       |  |       |  |       |  |       |  |       |  |       |  |       |  |       |  |       |  |       |  |       |  |       |  |       |  |       |  |       |  |       |  |       |  |       |  |       |  |       |  |       |  |       |  |       |  |       |  |       |  |       |  |       |  |       |  |       |  |       |  |       |  |       |  |       |  |       |  |       |  |       |  |       |  |       |  |       |  |       |  |       |  |       |  |       |  |       |  |       |  |       |  |       |  |       |  |       |  |       |  |       |  |       |  |       |  |       |  |       |  |       |  |       |  |       |  |       |  |       |  |       |  |       |  |       |  |       |  |       |  |       |  |       |  |       |  |       |  |       |  |       |  |       |  |       |  |       |  |       |  |       |  |       |  |       |  |       |  |       |  |       |  |       |  |       |  |       |  |       |  |       |  |       |  |       |  |       |  |       |  |       |  |       |  |       |  |       |  |       |  |       |  |       |  |       |  |       |  |       |  |       |  |       |  |       |  |       |  |       |  |       |  |       |  |       |  |       |  |       |  |       |  |       |  |       |  |       |  |       |  |       |  |       |  |       |  |       |  |       |  |       |  |       |  |       |  |       |  |       |  |       |  |       |  |       |  |       |  |       |  |       |  |       |  |       |  |       |  |       |  |       |  |       |  |       |  |       |  |       |  |       |  |       |  |       |  |       |  |       |  |       |  |       |  |       |  |       |  |       |  |       |  |       |  |       |  |       |  |       |  |       |  |       |  |       |  |       |  |       |  |       |  |       |  |       |  |       |  |       |  |       |  |       |  |       |  |       |  |       |  |       |  |       |  |       |  |       |  |       |  |       |  |       |  |       |  |       |  |       |  |       |  |       |  |       |  |       |  |       |  |       |  |       |  |       |  |       |  |       |  |       |  |       |  |       |  |       |  |       |  |       |  |       |  |       |  |       |  |       |  |       |  |       |  |       |  |       |  |       |  |       |  |       |  |       |  |       |  |       |  |       |  |       |  |       |  |       |  |       |  |       |  |       |  |       |  |       |  |       |  |       |  |       |  |       |  |       |  |       |  |       |  |       |  |       |  |
| 203238     | CC0091                    | CC1-MSSA                      | NEG                                      | NEG        | NEG          | NEG       | AMB    | NEG          | NEG       | NEG      | NEG      | NEG      | NEG      | NEG      | NEG      | NEG      | NEG    | NEG  | NEG    | NEG                      | NEG                      | NEG            | NEG                      | NEG                      | NEG            | 0             | 0      |      |               |  |                                          |  |      |  |      |  |      |  |      |  |      |  |      |  |      |  |      |  |      |  |      |  |      |  |      |  |       |  |       |  |       |  |       |  |       |  |       |  |       |  |       |  |       |  |       |  |       |  |       |  |       |  |       |  |       |  |       |  |       |  |       |  |       |  |       |  |       |  |       |  |       |  |       |  |       |  |       |  |       |  |       |  |       |  |       |  |       |  |       |  |       |  |       |  |       |  |       |  |       |  |       |  |       |  |       |  |       |  |       |  |       |  |       |  |       |  |       |  |       |  |       |  |       |  |       |  |       |  |       |  |       |  |       |  |       |  |       |  |       |  |       |  |       |  |       |  |       |  |       |  |       |  |       |  |       |  |       |  |       |  |       |  |       |  |       |  |       |  |       |  |       |  |       |  |       |  |       |  |       |  |       |  |       |  |       |  |       |  |       |  |       |  |       |  |       |  |       |  |       |  |       |  |       |  |       |  |       |  |       |  |       |  |       |  |       |  |       |  |       |  |       |  |       |  |       |  |       |  |       |  |       |  |       |  |       |  |       |  |       |  |       |  |       |  |       |  |       |  |       |  |       |  |       |  |       |  |       |  |       |  |       |  |       |  |       |  |       |  |       |  |       |  |       |  |       |  |       |  |       |  |       |  |       |  |       |  |       |  |       |  |       |  |       |  |       |  |       |  |       |  |       |  |       |  |       |  |       |  |       |  |       |  |       |  |       |  |       |  |       |  |       |  |       |  |       |  |       |  |       |  |       |  |       |  |       |  |       |  |       |  |       |  |       |  |       |  |       |  |       |  |       |  |       |  |       |  |       |  |       |  |       |  |       |  |       |  |       |  |       |  |       |  |       |  |       |  |       |  |       |  |       |  |       |  |       |  |       |  |       |  |       |  |       |  |       |  |       |  |       |  |       |  |       |  |       |  |       |  |       |  |       |  |       |  |       |  |       |  |       |  |       |  |       |  |       |  |       |  |       |  |       |  |       |  |       |  |       |  |       |  |       |  |       |  |       |  |       |  |       |  |       |  |       |  |       |  |       |  |       |  |       |  |       |  |       |  |       |  |       |  |       |  |       |  |       |  |       |  |       |  |       |  |       |  |       |  |       |  |       |  |       |  |       |  |       |  |       |  |       |  |       |  |       |  |       |  |       |  |       |  |       |  |       |  |       |  |       |  |       |  |       |  |       |  |       |  |       |  |       |  |       |  |       |  |       |  |       |  |       |  |       |  |       |  |       |  |       |  |       |  |       |  |       |  |       |  |       |  |       |  |       |  |       |  |       |  |       |  |       |  |       |  |       |  |       |  |       |  |       |  |       |  |       |  |       |  |       |  |       |  |       |  |       |  |       |  |       |  |       |  |       |  |       |  |       |  |       |  |       |  |       |  |       |  |       |  |       |  |       |  |       |  |       |  |       |  |       |  |       |  |       |  |       |  |       |  |       |  |       |  |       |  |       |  |       |  |       |  |       |  |       |  |       |  |       |  |       |  |       |  |       |  |       |  |       |  |       |  |       |  |       |  |       |  |       |  |       |  |       |  |       |  |       |  |       |  |       |  |       |  |       |  |       |  |       |  |       |  |       |  |       |  |       |  |       |  |       |  |       |  |       |  |       |  |       |  |       |  |       |  |       |  |       |  |       |  |       |  |       |  |       |  |       |  |       |  |       |  |       |  |       |  |       |  |       |  |       |  |       |  |       |  |       |  |       |  |       |  |       |  |       |  |       |  |       |  |       |  |       |  |       |  |       |  |       |  |       |  |       |  |       |  |       |  |       |  |       |  |       |  |       |  |       |  |       |  |       |  |       |  |       |  |       |  |       |  |       |  |       |  |       |  |       |  |       |  |       |  |       |  |       |  |       |  |       |  |       |  |       |  |       |  |       |  |       |  |       |  |       |  |       |  |       |  |       |  |       |  |       |  |       |  |       |  |       |  |       |  |       |  |       |  |       |  |       |  |       |  |       |  |       |  |       |  |       |  |       |  |       |  |       |  |       |  |       |  |       |  |       |  |       |  |       |  |       |  |       |  |       |  |       |  |       |  |       |  |       |  |       |  |       |  |       |  |       |  |       |  |       |  |       |  |       |  |       |  |       |  |       |  |       |  |       |  |       |  |       |  |       |  |       |  |       |  |       |  |       |  |       |  |       |  |       |  |       |  |       |  |       |  |       |  |       |  |       |  |       |  |       |  |       |  |       |  |       |  |       |  |       |  |       |  |       |  |       |  |       |  |       |  |       |  |       |  |       |  |       |  |       |  |       |  |       |  |       |  |       |  |       |  |       |  |       |  |       |  |       |  |       |  |       |  |       |  |       |  |       |  |       |  |       |  |       |  |       |  |       |  |       |  |       |  |       |  |       |  |       |  |       |  |       |  |       |  |       |  |       |  |       |  |       |  |       |  |       |  |       |  |       |  |       |  |       |  |       |  |       |  |       |  |       |  |       |  |       |  |       |  |       |  |       |  |       |  |       |  |       |  |       |  |       |  |       |  |       |  |       |  |       |  |       |  |       |  |       |  |       |  |       |  |       |  |       |  |       |  |       |  |       |  |       |  |       |  |       |  |       |  |       |  |       |  |       |  |       |  |       |  |       |  |       |  |       |  |       |  |       |  |       |  |       |  |       |  |       |  |       |  |       |  |       |  |       |  |       |  |       |  |       |  |       |  |       |  |       |  |       |  |       |  |       |  |       |  |       |  |       |  |       |  |       |  |       |  |       |  |       |  |       |  |       |  |       |  |       |  |       |  |       |  |       |  |       |  |       |  |       |  |       |  |       |  |       |  |       |  |       |  |       |  |       |  |       |  |       |  |       |  |       |  |       |  |       |  |       |  |       |  |       |  |       |  |       |  |       |  |       |  |       |  |       |  |       |  |       |  |       |  |       |  |       |  |       |  |       |  |       |  |       |  |       |  |       |  |       |  |       |  |       |  |       |  |       |  |       |  |       |  |       |  |       |  |       |  |       |  |       |  |       |  |       |  |       |  |       |  |       |  |       |  |       |  |       |  |       |  |       |  |       |  |       |  |       |  |       |  |       |  |       |  |       |  |       |  |       |  |       |  |       |  |       |  |       |  |       |  |       |  |       |  |       |  |
| 203239     | CC0091                    | CC1-MSSA                      | NEG                                      | NEG        | NEG          | NEG       | AMB    | NEG          | NEG       | NEG      | NEG      | NEG      | NEG      | NEG      | NEG      | NEG      | NEG    | NEG  | NEG    | NEG                      | NEG                      | NEG            | NEG                      | NEG                      | NEG            | 0             | 0      |      |               |  |                                          |  |      |  |      |  |      |  |      |  |      |  |      |  |      |  |      |  |      |  |      |  |      |  |      |  |       |  |       |  |       |  |       |  |       |  |       |  |       |  |       |  |       |  |       |  |       |  |       |  |       |  |       |  |       |  |       |  |       |  |       |  |       |  |       |  |       |  |       |  |       |  |       |  |       |  |       |  |       |  |       |  |       |  |       |  |       |  |       |  |       |  |       |  |       |  |       |  |       |  |       |  |       |  |       |  |       |  |       |  |       |  |       |  |       |  |       |  |       |  |       |  |       |  |       |  |       |  |       |  |       |  |       |  |       |  |       |  |       |  |       |  |       |  |       |  |       |  |       |  |       |  |       |  |       |  |       |  |       |  |       |  |       |  |       |  |       |  |       |  |       |  |       |  |       |  |       |  |       |  |       |  |       |  |       |  |       |  |       |  |       |  |       |  |       |  |       |  |       |  |       |  |       |  |       |  |       |  |       |  |       |  |       |  |       |  |       |  |       |  |       |  |       |  |       |  |       |  |       |  |       |  |       |  |       |  |       |  |       |  |       |  |       |  |       |  |       |  |       |  |       |  |       |  |       |  |       |  |       |  |       |  |       |  |       |  |       |  |       |  |       |  |       |  |       |  |       |  |       |  |       |  |       |  |       |  |       |  |       |  |       |  |       |  |       |  |       |  |       |  |       |  |       |  |       |  |       |  |       |  |       |  |       |  |       |  |       |  |       |  |       |  |       |  |       |  |       |  |       |  |       |  |       |  |       |  |       |  |       |  |       |  |       |  |       |  |       |  |       |  |       |  |       |  |       |  |       |  |       |  |       |  |       |  |       |  |       |  |       |  |       |  |       |  |       |  |       |  |       |  |       |  |       |  |       |  |       |  |       |  |       |  |       |  |       |  |       |  |       |  |       |  |       |  |       |  |       |  |       |  |       |  |       |  |       |  |       |  |       |  |       |  |       |  |       |  |       |  |       |  |       |  |       |  |       |  |       |  |       |  |       |  |       |  |       |  |       |  |       |  |       |  |       |  |       |  |       |  |       |  |       |  |       |  |       |  |       |  |       |  |       |  |       |  |       |  |       |  |       |  |       |  |       |  |       |  |       |  |       |  |       |  |       |  |       |  |       |  |       |  |       |  |       |  |       |  |       |  |       |  |       |  |       |  |       |  |       |  |       |  |       |  |       |  |       |  |       |  |       |  |       |  |       |  |       |  |       |  |       |  |       |  |       |  |       |  |       |  |       |  |       |  |       |  |       |  |       |  |       |  |       |  |       |  |       |  |       |  |       |  |       |  |       |  |       |  |       |  |       |  |       |  |       |  |       |  |       |  |       |  |       |  |       |  |       |  |       |  |       |  |       |  |       |  |       |  |       |  |       |  |       |  |       |  |       |  |       |  |       |  |       |  |       |  |       |  |       |  |       |  |       |  |       |  |       |  |       |  |       |  |       |  |       |  |       |  |       |  |       |  |       |  |       |  |       |  |       |  |       |  |       |  |       |  |       |  |       |  |       |  |       |  |       |  |       |  |       |  |       |  |       |  |       |  |       |  |       |  |       |  |       |  |       |  |       |  |       |  |       |  |       |  |       |  |       |  |       |  |       |  |       |  |       |  |       |  |       |  |       |  |       |  |       |  |       |  |       |  |       |  |       |  |       |  |       |  |       |  |       |  |       |  |       |  |       |  |       |  |       |  |       |  |       |  |       |  |       |  |       |  |       |  |       |  |       |  |       |  |       |  |       |  |       |  |       |  |       |  |       |  |       |  |       |  |       |  |       |  |       |  |       |  |       |  |       |  |       |  |       |  |       |  |       |  |       |  |       |  |       |  |       |  |       |  |       |  |       |  |       |  |       |  |       |  |       |  |       |  |       |  |       |  |       |  |       |  |       |  |       |  |       |  |       |  |       |  |       |  |       |  |       |  |       |  |       |  |       |  |       |  |       |  |       |  |       |  |       |  |       |  |       |  |       |  |       |  |       |  |       |  |       |  |       |  |       |  |       |  |       |  |       |  |       |  |       |  |       |  |       |  |       |  |       |  |       |  |       |  |       |  |       |  |       |  |       |  |       |  |       |  |       |  |       |  |       |  |       |  |       |  |       |  |       |  |       |  |       |  |       |  |       |  |       |  |       |  |       |  |       |  |       |  |       |  |       |  |       |  |       |  |       |  |       |  |       |  |       |  |       |  |       |  |       |  |       |  |       |  |       |  |       |  |       |  |       |  |       |  |       |  |       |  |       |  |       |  |       |  |       |  |       |  |       |  |       |  |       |  |       |  |       |  |       |  |       |  |       |  |       |  |       |  |       |  |       |  |       |  |       |  |       |  |       |  |       |  |       |  |       |  |       |  |       |  |       |  |       |  |       |  |       |  |       |  |       |  |       |  |       |  |       |  |       |  |       |  |       |  |       |  |       |  |       |  |       |  |       |  |       |  |       |  |       |  |       |  |       |  |       |  |       |  |       |  |       |  |       |  |       |  |       |  |       |  |       |  |       |  |       |  |       |  |       |  |       |  |       |  |       |  |       |  |       |  |       |  |       |  |       |  |       |  |       |  |       |  |       |  |       |  |       |  |       |  |       |  |       |  |       |  |       |  |       |  |       |  |       |  |       |  |       |  |       |  |       |  |       |  |       |  |       |  |       |  |       |  |       |  |       |  |       |  |       |  |       |  |       |  |       |  |       |  |       |  |       |  |       |  |       |  |       |  |       |  |       |  |       |  |       |  |       |  |       |  |       |  |       |  |       |  |       |  |       |  |       |  |       |  |       |  |       |  |       |  |       |  |       |  |       |  |       |  |       |  |       |  |       |  |       |  |       |  |       |  |       |  |       |  |       |  |       |  |       |  |       |  |       |  |       |  |       |  |       |  |       |  |       |  |       |  |       |  |       |  |       |  |       |  |       |  |       |  |       |  |       |  |       |  |       |  |       |  |       |  |       |  |       |  |       |  |       |  |       |  |       |  |       |  |       |  |       |  |       |  |       |  |       |  |       |  |       |  |       |  |       |  |       |  |       |  |       |  |       |  |       |  |       |  |       |  |       |  |       |  |       |  |       |  |       |  |       |  |       |  |       |  |       |  |       |  |       |  |
| 203240     | CC0091                    | CC1-MSSA                      | NEG                                      | NEG        | NEG          | NEG       | AMB    | NEG          | NEG       | NEG      | NEG      | NEG      | NEG      | NEG      | NEG      | NEG      | NEG    | NEG  | NEG    | NEG                      | NEG                      | NEG            | NEG                      | NEG                      | NEG            | 0             | 0      |      |               |  |                                          |  |      |  |      |  |      |  |      |  |      |  |      |  |      |  |      |  |      |  |      |  |      |  |      |  |       |  |       |  |       |  |       |  |       |  |       |  |       |  |       |  |       |  |       |  |       |  |       |  |       |  |       |  |       |  |       |  |       |  |       |  |       |  |       |  |       |  |       |  |       |  |       |  |       |  |       |  |       |  |       |  |       |  |       |  |       |  |       |  |       |  |       |  |       |  |       |  |       |  |       |  |       |  |       |  |       |  |       |  |       |  |       |  |       |  |       |  |       |  |       |  |       |  |       |  |       |  |       |  |       |  |       |  |       |  |       |  |       |  |       |  |       |  |       |  |       |  |       |  |       |  |       |  |       |  |       |  |       |  |       |  |       |  |       |  |       |  |       |  |       |  |       |  |       |  |       |  |       |  |       |  |       |  |       |  |       |  |       |  |       |  |       |  |       |  |       |  |       |  |       |  |       |  |       |  |       |  |       |  |       |  |       |  |       |  |       |  |       |  |       |  |       |  |       |  |       |  |       |  |       |  |       |  |       |  |       |  |       |  |       |  |       |  |       |  |       |  |       |  |       |  |       |  |       |  |       |  |       |  |       |  |       |  |       |  |       |  |       |  |       |  |       |  |       |  |       |  |       |  |       |  |       |  |       |  |       |  |       |  |       |  |       |  |       |  |       |  |       |  |       |  |       |  |       |  |       |  |       |  |       |  |       |  |       |  |       |  |       |  |       |  |       |  |       |  |       |  |       |  |       |  |       |  |       |  |       |  |       |  |       |  |       |  |       |  |       |  |       |  |       |  |       |  |       |  |       |  |       |  |       |  |       |  |       |  |       |  |       |  |       |  |       |  |       |  |       |  |       |  |       |  |       |  |       |  |       |  |       |  |       |  |       |  |       |  |       |  |       |  |       |  |       |  |       |  |       |  |       |  |       |  |       |  |       |  |       |  |       |  |       |  |       |  |       |  |       |  |       |  |       |  |       |  |       |  |       |  |       |  |       |  |       |  |       |  |       |  |       |  |       |  |       |  |       |  |       |  |       |  |       |  |       |  |       |  |       |  |       |  |       |  |       |  |       |  |       |  |       |  |       |  |       |  |       |  |       |  |       |  |       |  |       |  |       |  |       |  |       |  |       |  |       |  |       |  |       |  |       |  |       |  |       |  |       |  |       |  |       |  |       |  |       |  |       |  |       |  |       |  |       |  |       |  |       |  |       |  |       |  |       |  |       |  |       |  |       |  |       |  |       |  |       |  |       |  |       |  |       |  |       |  |       |  |       |  |       |  |       |  |       |  |       |  |       |  |       |  |       |  |       |  |       |  |       |  |       |  |       |  |       |  |       |  |       |  |       |  |       |  |       |  |       |  |       |  |       |  |       |  |       |  |       |  |       |  |       |  |       |  |       |  |       |  |       |  |       |  |       |  |       |  |       |  |       |  |       |  |       |  |       |  |       |  |       |  |       |  |       |  |       |  |       |  |       |  |       |  |       |  |       |  |       |  |       |  |       |  |       |  |       |  |       |  |       |  |       |  |       |  |       |  |       |  |       |  |       |  |       |  |       |  |       |  |       |  |       |  |       |  |       |  |       |  |       |  |       |  |       |  |       |  |       |  |       |  |       |  |       |  |       |  |       |  |       |  |       |  |       |  |       |  |       |  |       |  |       |  |       |  |       |  |       |  |       |  |       |  |       |  |       |  |       |  |       |  |       |  |       |  |       |  |       |  |       |  |       |  |       |  |       |  |       |  |       |  |       |  |       |  |       |  |       |  |       |  |       |  |       |  |       |  |       |  |       |  |       |  |       |  |       |  |       |  |       |  |       |  |       |  |       |  |       |  |       |  |       |  |       |  |       |  |       |  |       |  |       |  |       |  |       |  |       |  |       |  |       |  |       |  |       |  |       |  |       |  |       |  |       |  |       |  |       |  |       |  |       |  |       |  |       |  |       |  |       |  |       |  |       |  |       |  |       |  |       |  |       |  |       |  |       |  |       |  |       |  |       |  |       |  |       |  |       |  |       |  |       |  |       |  |       |  |       |  |       |  |       |  |       |  |       |  |       |  |       |  |       |  |       |  |       |  |       |  |       |  |       |  |       |  |       |  |       |  |       |  |       |  |       |  |       |  |       |  |       |  |       |  |       |  |       |  |       |  |       |  |       |  |       |  |       |  |       |  |       |  |       |  |       |  |       |  |       |  |       |  |       |  |       |  |       |  |       |  |       |  |       |  |       |  |       |  |       |  |       |  |       |  |       |  |       |  |       |  |       |  |       |  |       |  |       |  |       |  |       |  |       |  |       |  |       |  |       |  |       |  |       |  |       |  |       |  |       |  |       |  |       |  |       |  |       |  |       |  |       |  |       |  |       |  |       |  |       |  |       |  |       |  |       |  |       |  |       |  |       |  |       |  |       |  |       |  |       |  |       |  |       |  |       |  |       |  |       |  |       |  |       |  |       |  |       |  |       |  |       |  |       |  |       |  |       |  |       |  |       |  |       |  |       |  |       |  |       |  |       |  |       |  |       |  |       |  |       |  |       |  |       |  |       |  |       |  |       |  |       |  |       |  |       |  |       |  |       |  |       |  |       |  |       |  |       |  |       |  |       |  |       |  |       |  |       |  |       |  |       |  |       |  |       |  |       |  |       |  |       |  |       |  |       |  |       |  |       |  |       |  |       |  |       |  |       |  |       |  |       |  |       |  |       |  |       |  |       |  |       |  |       |  |       |  |       |  |       |  |       |  |       |  |       |  |       |  |       |  |       |  |       |  |       |  |       |  |       |  |       |  |       |  |       |  |       |  |       |  |       |  |       |  |       |  |       |  |       |  |       |  |       |  |       |  |       |  |       |  |       |  |       |  |       |  |       |  |       |  |       |  |       |  |       |  |       |  |       |  |       |  |       |  |       |  |       |  |       |  |       |  |       |  |       |  |       |  |       |  |       |  |       |  |       |  |       |  |       |  |       |  |       |  |       |  |       |  |       |  |       |  |       |  |       |  |       |  |       |  |       |  |       |  |       |  |       |  |       |  |       |  |       |  |       |  |       |  |       |  |       |  |       |  |       |  |       |  |       |  |       |  |       |  |       |  |       |  |
| 203241     | CC0091                    | CC1-MSSA                      | NEG                                      | NEG        | NEG          | NEG       | AMB    | NEG          | NEG       | NEG      | NEG      | NEG      | NEG      | NEG      | NEG      | NEG      | NEG    | NEG  | NEG    | NEG                      | NEG                      | NEG            | NEG                      | NEG                      | NEG            | 0             | 0      |      |               |  |                                          |  |      |  |      |  |      |  |      |  |      |  |      |  |      |  |      |  |      |  |      |  |      |  |      |  |       |  |       |  |       |  |       |  |       |  |       |  |       |  |       |  |       |  |       |  |       |  |       |  |       |  |       |  |       |  |       |  |       |  |       |  |       |  |       |  |       |  |       |  |       |  |       |  |       |  |       |  |       |  |       |  |       |  |       |  |       |  |       |  |       |  |       |  |       |  |       |  |       |  |       |  |       |  |       |  |       |  |       |  |       |  |       |  |       |  |       |  |       |  |       |  |       |  |       |  |       |  |       |  |       |  |       |  |       |  |       |  |       |  |       |  |       |  |       |  |       |  |       |  |       |  |       |  |       |  |       |  |       |  |       |  |       |  |       |  |       |  |       |  |       |  |       |  |       |  |       |  |       |  |       |  |       |  |       |  |       |  |       |  |       |  |       |  |       |  |       |  |       |  |       |  |       |  |       |  |       |  |       |  |       |  |       |  |       |  |       |  |       |  |       |  |       |  |       |  |       |  |       |  |       |  |       |  |       |  |       |  |       |  |       |  |       |  |       |  |       |  |       |  |       |  |       |  |       |  |       |  |       |  |       |  |       |  |       |  |       |  |       |  |       |  |       |  |       |  |       |  |       |  |       |  |       |  |       |  |       |  |       |  |       |  |       |  |       |  |       |  |       |  |       |  |       |  |       |  |       |  |       |  |       |  |       |  |       |  |       |  |       |  |       |  |       |  |       |  |       |  |       |  |       |  |       |  |       |  |       |  |       |  |       |  |       |  |       |  |       |  |       |  |       |  |       |  |       |  |       |  |       |  |       |  |       |  |       |  |       |  |       |  |       |  |       |  |       |  |       |  |       |  |       |  |       |  |       |  |       |  |       |  |       |  |       |  |       |  |       |  |       |  |       |  |       |  |       |  |       |  |       |  |       |  |       |  |       |  |       |  |       |  |       |  |       |  |       |  |       |  |       |  |       |  |       |  |       |  |       |  |       |  |       |  |       |  |       |  |       |  |       |  |       |  |       |  |       |  |       |  |       |  |       |  |       |  |       |  |       |  |       |  |       |  |       |  |       |  |       |  |       |  |       |  |       |  |       |  |       |  |       |  |       |  |       |  |       |  |       |  |       |  |       |  |       |  |       |  |       |  |       |  |       |  |       |  |       |  |       |  |       |  |       |  |       |  |       |  |       |  |       |  |       |  |       |  |       |  |       |  |       |  |       |  |       |  |       |  |       |  |       |  |       |  |       |  |       |  |       |  |       |  |       |  |       |  |       |  |       |  |       |  |       |  |       |  |       |  |       |  |       |  |       |  |       |  |       |  |       |  |       |  |       |  |       |  |       |  |       |  |       |  |       |  |       |  |       |  |       |  |       |  |       |  |       |  |       |  |       |  |       |  |       |  |       |  |       |  |       |  |       |  |       |  |       |  |       |  |       |  |       |  |       |  |       |  |       |  |       |  |       |  |       |  |       |  |       |  |       |  |       |  |       |  |       |  |       |  |       |  |       |  |       |  |       |  |       |  |       |  |       |  |       |  |       |  |       |  |       |  |       |  |       |  |       |  |       |  |       |  |       |  |       |  |       |  |       |  |       |  |       |  |       |  |       |  |       |  |       |  |       |  |       |  |       |  |       |  |       |  |       |  |       |  |       |  |       |  |       |  |       |  |       |  |       |  |       |  |       |  |       |  |       |  |       |  |       |  |       |  |       |  |       |  |       |  |       |  |       |  |       |  |       |  |       |  |       |  |       |  |       |  |       |  |       |  |       |  |       |  |       |  |       |  |       |  |       |  |       |  |       |  |       |  |       |  |       |  |       |  |       |  |       |  |       |  |       |  |       |  |       |  |       |  |       |  |       |  |       |  |       |  |       |  |       |  |       |  |       |  |       |  |       |  |       |  |       |  |       |  |       |  |       |  |       |  |       |  |       |  |       |  |       |  |       |  |       |  |       |  |       |  |       |  |       |  |       |  |       |  |       |  |       |  |       |  |       |  |       |  |       |  |       |  |       |  |       |  |       |  |       |  |       |  |       |  |       |  |       |  |       |  |       |  |       |  |       |  |       |  |       |  |       |  |       |  |       |  |       |  |       |  |       |  |       |  |       |  |       |  |       |  |       |  |       |  |       |  |       |  |       |  |       |  |       |  |       |  |       |  |       |  |       |  |       |  |       |  |       |  |       |  |       |  |       |  |       |  |       |  |       |  |       |  |       |  |       |  |       |  |       |  |       |  |       |  |       |  |       |  |       |  |       |  |       |  |       |  |       |  |       |  |       |  |       |  |       |  |       |  |       |  |       |  |       |  |       |  |       |  |       |  |       |  |       |  |       |  |       |  |       |  |       |  |       |  |       |  |       |  |       |  |       |  |       |  |       |  |       |  |       |  |       |  |       |  |       |  |       |  |       |  |       |  |       |  |       |  |       |  |       |  |       |  |       |  |       |  |       |  |       |  |       |  |       |  |       |  |       |  |       |  |       |  |       |  |       |  |       |  |       |  |       |  |       |  |       |  |       |  |       |  |       |  |       |  |       |  |       |  |       |  |       |  |       |  |       |  |       |  |       |  |       |  |       |  |       |  |       |  |       |  |       |  |       |  |       |  |       |  |       |  |       |  |       |  |       |  |       |  |       |  |       |  |       |  |       |  |       |  |       |  |       |  |       |  |       |  |       |  |       |  |       |  |       |  |       |  |       |  |       |  |       |  |       |  |       |  |       |  |       |  |       |  |       |  |       |  |       |  |       |  |       |  |       |  |       |  |       |  |       |  |       |  |       |  |       |  |       |  |       |  |       |  |       |  |       |  |       |  |       |  |       |  |       |  |       |  |       |  |       |  |       |  |       |  |       |  |       |  |       |  |       |  |       |  |       |  |       |  |       |  |       |  |       |  |       |  |       |  |       |  |       |  |       |  |       |  |       |  |       |  |       |  |       |  |       |  |       |  |       |  |       |  |       |  |       |  |       |  |       |  |       |  |       |  |       |  |       |  |       |  |       |  |       |  |       |  |       |  |       |  |       |  |       |  |       |  |       |  |       |  |       |  |       |  |       |  |       |  |       |  |       |  |       |  |       |  |       |  |       |  |       |  |
| 203242     | CC0091                    | CC1-MSSA                      | NEG                                      | NEG        | NEG          | NEG       | AMB    | NEG          | NEG       | NEG      | NEG      | NEG      | NEG      | NEG      | NEG      | NEG      | NEG    | NEG  | NEG    | NEG                      | NEG                      | NEG            | NEG                      | NEG                      | NEG            | 0             | 0      |      |               |  |                                          |  |      |  |      |  |      |  |      |  |      |  |      |  |      |  |      |  |      |  |      |  |      |  |      |  |       |  |       |  |       |  |       |  |       |  |       |  |       |  |       |  |       |  |       |  |       |  |       |  |       |  |       |  |       |  |       |  |       |  |       |  |       |  |       |  |       |  |       |  |       |  |       |  |       |  |       |  |       |  |       |  |       |  |       |  |       |  |       |  |       |  |       |  |       |  |       |  |       |  |       |  |       |  |       |  |       |  |       |  |       |  |       |  |       |  |       |  |       |  |       |  |       |  |       |  |       |  |       |  |       |  |       |  |       |  |       |  |       |  |       |  |       |  |       |  |       |  |       |  |       |  |       |  |       |  |       |  |       |  |       |  |       |  |       |  |       |  |       |  |       |  |       |  |       |  |       |  |       |  |       |  |       |  |       |  |       |  |       |  |       |  |       |  |       |  |       |  |       |  |       |  |       |  |       |  |       |  |       |  |       |  |       |  |       |  |       |  |       |  |       |  |       |  |       |  |       |  |       |  |       |  |       |  |       |  |       |  |       |  |       |  |       |  |       |  |       |  |       |  |       |  |       |  |       |  |       |  |       |  |       |  |       |  |       |  |       |  |       |  |       |  |       |  |       |  |       |  |       |  |       |  |       |  |       |  |       |  |       |  |       |  |       |  |       |  |       |  |       |  |       |  |       |  |       |  |       |  |       |  |       |  |       |  |       |  |       |  |       |  |       |  |       |  |       |  |       |  |       |  |       |  |       |  |       |  |       |  |       |  |       |  |       |  |       |  |       |  |       |  |       |  |       |  |       |  |       |  |       |  |       |  |       |  |       |  |       |  |       |  |       |  |       |  |       |  |       |  |       |  |       |  |       |  |       |  |       |  |       |  |       |  |       |  |       |  |       |  |       |  |       |  |       |  |       |  |       |  |       |  |       |  |       |  |       |  |       |  |       |  |       |  |       |  |       |  |       |  |       |  |       |  |       |  |       |  |       |  |       |  |       |  |       |  |       |  |       |  |       |  |       |  |       |  |       |  |       |  |       |  |       |  |       |  |       |  |       |  |       |  |       |  |       |  |       |  |       |  |       |  |       |  |       |  |       |  |       |  |       |  |       |  |       |  |       |  |       |  |       |  |       |  |       |  |       |  |       |  |       |  |       |  |       |  |       |  |       |  |       |  |       |  |       |  |       |  |       |  |       |  |       |  |       |  |       |  |       |  |       |  |       |  |       |  |       |  |       |  |       |  |       |  |       |  |       |  |       |  |       |  |       |  |       |  |       |  |       |  |       |  |       |  |       |  |       |  |       |  |       |  |       |  |       |  |       |  |       |  |       |  |       |  |       |  |       |  |       |  |       |  |       |  |       |  |       |  |       |  |       |  |       |  |       |  |       |  |       |  |       |  |       |  |       |  |       |  |       |  |       |  |       |  |       |  |       |  |       |  |       |  |       |  |       |  |       |  |       |  |       |  |       |  |       |  |       |  |       |  |       |  |       |  |       |  |       |  |       |  |       |  |       |  |       |  |       |  |       |  |       |  |       |  |       |  |       |  |       |  |       |  |       |  |       |  |       |  |       |  |       |  |       |  |       |  |       |  |       |  |       |  |       |  |       |  |       |  |       |  |       |  |       |  |       |  |       |  |       |  |       |  |       |  |       |  |       |  |       |  |       |  |       |  |       |  |       |  |       |  |       |  |       |  |       |  |       |  |       |  |       |  |       |  |       |  |       |  |       |  |       |  |       |  |       |  |       |  |       |  |       |  |       |  |       |  |       |  |       |  |       |  |       |  |       |  |       |  |       |  |       |  |       |  |       |  |       |  |       |  |       |  |       |  |       |  |       |  |       |  |       |  |       |  |       |  |       |  |       |  |       |  |       |  |       |  |       |  |       |  |       |  |       |  |       |  |       |  |       |  |       |  |       |  |       |  |       |  |       |  |       |  |       |  |       |  |       |  |       |  |       |  |       |  |       |  |       |  |       |  |       |  |       |  |       |  |       |  |       |  |       |  |       |  |       |  |       |  |       |  |       |  |       |  |       |  |       |  |       |  |       |  |       |  |       |  |       |  |       |  |       |  |       |  |       |  |       |  |       |  |       |  |       |  |       |  |       |  |       |  |       |  |       |  |       |  |       |  |       |  |       |  |       |  |       |  |       |  |       |  |       |  |       |  |       |  |       |  |       |  |       |  |       |  |       |  |       |  |       |  |       |  |       |  |       |  |       |  |       |  |       |  |       |  |       |  |       |  |       |  |       |  |       |  |       |  |       |  |       |  |       |  |       |  |       |  |       |  |       |  |       |  |       |  |       |  |       |  |       |  |       |  |       |  |       |  |       |  |       |  |       |  |       |  |       |  |       |  |       |  |       |  |       |  |       |  |       |  |       |  |       |  |       |  |       |  |       |  |       |  |       |  |       |  |       |  |       |  |       |  |       |  |       |  |       |  |       |  |       |  |       |  |       |  |       |  |       |  |       |  |       |  |       |  |       |  |       |  |       |  |       |  |       |  |       |  |       |  |       |  |       |  |       |  |       |  |       |  |       |  |       |  |       |  |       |  |       |  |       |  |       |  |       |  |       |  |       |  |       |  |       |  |       |  |       |  |       |  |       |  |       |  |       |  |       |  |       |  |       |  |       |  |       |  |       |  |       |  |       |  |       |  |       |  |       |  |       |  |       |  |       |  |       |  |       |  |       |  |       |  |       |  |       |  |       |  |       |  |       |  |       |  |       |  |       |  |       |  |       |  |       |  |       |  |       |  |       |  |       |  |       |  |       |  |       |  |       |  |       |  |       |  |       |  |       |  |       |  |       |  |       |  |       |  |       |  |       |  |       |  |       |  |       |  |       |  |       |  |       |  |       |  |       |  |       |  |       |  |       |  |       |  |       |  |       |  |       |  |       |  |       |  |       |  |       |  |       |  |       |  |       |  |       |  |       |  |       |  |       |  |       |  |       |  |       |  |       |  |       |  |       |  |       |  |       |  |       |  |       |  |       |  |       |  |       |  |       |  |       |  |       |  |       |  |       |  |       |  |       |  |       |  |       |  |       |  |       |  |       |  |       |  |       |  |       |  |       |  |       |  |       |  |       |  |
| 203243     | CC0091                    | CC1-MSSA                      | NEG                                      | NEG        | NEG          | NEG       | AMB    | NEG          | NEG       | NEG      | NEG      | NEG      | NEG      | NEG      | NEG      | NEG      | NEG    | NEG  | NEG    | NEG                      | NEG                      | NEG            | NEG                      | NEG                      | NEG            | 0             | 0      |      |               |  |                                          |  |      |  |      |  |      |  |      |  |      |  |      |  |      |  |      |  |      |  |      |  |      |  |      |  |       |  |       |  |       |  |       |  |       |  |       |  |       |  |       |  |       |  |       |  |       |  |       |  |       |  |       |  |       |  |       |  |       |  |       |  |       |  |       |  |       |  |       |  |       |  |       |  |       |  |       |  |       |  |       |  |       |  |       |  |       |  |       |  |       |  |       |  |       |  |       |  |       |  |       |  |       |  |       |  |       |  |       |  |       |  |       |  |       |  |       |  |       |  |       |  |       |  |       |  |       |  |       |  |       |  |       |  |       |  |       |  |       |  |       |  |       |  |       |  |       |  |       |  |       |  |       |  |       |  |       |  |       |  |       |  |       |  |       |  |       |  |       |  |       |  |       |  |       |  |       |  |       |  |       |  |       |  |       |  |       |  |       |  |       |  |       |  |       |  |       |  |       |  |       |  |       |  |       |  |       |  |       |  |       |  |       |  |       |  |       |  |       |  |       |  |       |  |       |  |       |  |       |  |       |  |       |  |       |  |       |  |       |  |       |  |       |  |       |  |       |  |       |  |       |  |       |  |       |  |       |  |       |  |       |  |       |  |       |  |       |  |       |  |       |  |       |  |       |  |       |  |       |  |       |  |       |  |       |  |       |  |       |  |       |  |       |  |       |  |       |  |       |  |       |  |       |  |       |  |       |  |       |  |       |  |       |  |       |  |       |  |       |  |       |  |       |  |       |  |       |  |       |  |       |  |       |  |       |  |       |  |       |  |       |  |       |  |       |  |       |  |       |  |       |  |       |  |       |  |       |  |       |  |       |  |       |  |       |  |       |  |       |  |       |  |       |  |       |  |       |  |       |  |       |  |       |  |       |  |       |  |       |  |       |  |       |  |       |  |       |  |       |  |       |  |       |  |       |  |       |  |       |  |       |  |       |  |       |  |       |  |       |  |       |  |       |  |       |  |       |  |       |  |       |  |       |  |       |  |       |  |       |  |       |  |       |  |       |  |       |  |       |  |       |  |       |  |       |  |       |  |       |  |       |  |       |  |       |  |       |  |       |  |       |  |       |  |       |  |       |  |       |  |       |  |       |  |       |  |       |  |       |  |       |  |       |  |       |  |       |  |       |  |       |  |       |  |       |  |       |  |       |  |       |  |       |  |       |  |       |  |       |  |       |  |       |  |       |  |       |  |       |  |       |  |       |  |       |  |       |  |       |  |       |  |       |  |       |  |       |  |       |  |       |  |       |  |       |  |       |  |       |  |       |  |       |  |       |  |       |  |       |  |       |  |       |  |       |  |       |  |       |  |       |  |       |  |       |  |       |  |       |  |       |  |       |  |       |  |       |  |       |  |       |  |       |  |       |  |       |  |       |  |       |  |       |  |       |  |       |  |       |  |       |  |       |  |       |  |       |  |       |  |       |  |       |  |       |  |       |  |       |  |       |  |       |  |       |  |       |  |       |  |       |  |       |  |       |  |       |  |       |  |       |  |       |  |       |  |       |  |       |  |       |  |       |  |       |  |       |  |       |  |       |  |       |  |       |  |       |  |       |  |       |  |       |  |       |  |       |  |       |  |       |  |       |  |       |  |       |  |       |  |       |  |       |  |       |  |       |  |       |  |       |  |       |  |       |  |       |  |       |  |       |  |       |  |       |  |       |  |       |  |       |  |       |  |       |  |       |  |       |  |       |  |       |  |       |  |       |  |       |  |       |  |       |  |       |  |       |  |       |  |       |  |       |  |       |  |       |  |       |  |       |  |       |  |       |  |       |  |       |  |       |  |       |  |       |  |       |  |       |  |       |  |       |  |       |  |       |  |       |  |       |  |       |  |       |  |       |  |       |  |       |  |       |  |       |  |       |  |       |  |       |  |       |  |       |  |       |  |       |  |       |  |       |  |       |  |       |  |       |  |       |  |       |  |       |  |       |  |       |  |       |  |       |  |       |  |       |  |       |  |       |  |       |  |       |  |       |  |       |  |       |  |       |  |       |  |       |  |       |  |       |  |       |  |       |  |       |  |       |  |       |  |       |  |       |  |       |  |       |  |       |  |       |  |       |  |       |  |       |  |       |  |       |  |       |  |       |  |       |  |       |  |       |  |       |  |       |  |       |  |       |  |       |  |       |  |       |  |       |  |       |  |       |  |       |  |       |  |       |  |       |  |       |  |       |  |       |  |       |  |       |  |       |  |       |  |       |  |       |  |       |  |       |  |       |  |       |  |       |  |       |  |       |  |       |  |       |  |       |  |       |  |       |  |       |  |       |  |       |  |       |  |       |  |       |  |       |  |       |  |       |  |       |  |       |  |       |  |       |  |       |  |       |  |       |  |       |  |       |  |       |  |       |  |       |  |       |  |       |  |       |  |       |  |       |  |       |  |       |  |       |  |       |  |       |  |       |  |       |  |       |  |       |  |       |  |       |  |       |  |       |  |       |  |       |  |       |  |       |  |       |  |       |  |       |  |       |  |       |  |       |  |       |  |       |  |       |  |       |  |       |  |       |  |       |  |       |  |       |  |       |  |       |  |       |  |       |  |       |  |       |  |       |  |       |  |       |  |       |  |       |  |       |  |       |  |       |  |       |  |       |  |       |  |       |  |       |  |       |  |       |  |       |  |       |  |       |  |       |  |       |  |       |  |       |  |       |  |       |  |       |  |       |  |       |  |       |  |       |  |       |  |       |  |       |  |       |  |       |  |       |  |       |  |       |  |       |  |       |  |       |  |       |  |       |  |       |  |       |  |       |  |       |  |       |  |       |  |       |  |       |  |       |  |       |  |       |  |       |  |       |  |       |  |       |  |       |  |       |  |       |  |       |  |       |  |       |  |       |  |       |  |       |  |       |  |       |  |       |  |       |  |       |  |       |  |       |  |       |  |       |  |       |  |       |  |       |  |       |  |       |  |       |  |       |  |       |  |       |  |       |  |       |  |       |  |       |  |       |  |       |  |       |  |       |  |       |  |       |  |       |  |       |  |       |  |       |  |       |  |       |  |       |  |       |  |       |  |       |  |       |  |       |  |       |  |       |  |       |  |       |  |       |  |       |  |       |  |       |  |       |  |       |  |       |  |       |  |       |  |       |  |
| 203244     | CC0091                    | CC1-MSSA                      | NEG                                      | NEG        | NEG          | NEG       | AMB    | NEG          | NEG       | NEG      | NEG      | NEG      | NEG      | NEG      | NEG      | NEG      | NEG    | NEG  | NEG    | NEG                      | NEG                      | NEG            | NEG                      | NEG                      | NEG            | 0             | 0      |      |               |  |                                          |  |      |  |      |  |      |  |      |  |      |  |      |  |      |  |      |  |      |  |      |  |      |  |      |  |       |  |       |  |       |  |       |  |       |  |       |  |       |  |       |  |       |  |       |  |       |  |       |  |       |  |       |  |       |  |       |  |       |  |       |  |       |  |       |  |       |  |       |  |       |  |       |  |       |  |       |  |       |  |       |  |       |  |       |  |       |  |       |  |       |  |       |  |       |  |       |  |       |  |       |  |       |  |       |  |       |  |       |  |       |  |       |  |       |  |       |  |       |  |       |  |       |  |       |  |       |  |       |  |       |  |       |  |       |  |       |  |       |  |       |  |       |  |       |  |       |  |       |  |       |  |       |  |       |  |       |  |       |  |       |  |       |  |       |  |       |  |       |  |       |  |       |  |       |  |       |  |       |  |       |  |       |  |       |  |       |  |       |  |       |  |       |  |       |  |       |  |       |  |       |  |       |  |       |  |       |  |       |  |       |  |       |  |       |  |       |  |       |  |       |  |       |  |       |  |       |  |       |  |       |  |       |  |       |  |       |  |       |  |       |  |       |  |       |  |       |  |       |  |       |  |       |  |       |  |       |  |       |  |       |  |       |  |       |  |       |  |       |  |       |  |       |  |       |  |       |  |       |  |       |  |       |  |       |  |       |  |       |  |       |  |       |  |       |  |       |  |       |  |       |  |       |  |       |  |       |  |       |  |       |  |       |  |       |  |       |  |       |  |       |  |       |  |       |  |       |  |       |  |       |  |       |  |       |  |       |  |       |  |       |  |       |  |       |  |       |  |       |  |       |  |       |  |       |  |       |  |       |  |       |  |       |  |       |  |       |  |       |  |       |  |       |  |       |  |       |  |       |  |       |  |       |  |       |  |       |  |       |  |       |  |       |  |       |  |       |  |       |  |       |  |       |  |       |  |       |  |       |  |       |  |       |  |       |  |       |  |       |  |       |  |       |  |       |  |       |  |       |  |       |  |       |  |       |  |       |  |       |  |       |  |       |  |       |  |       |  |       |  |       |  |       |  |       |  |       |  |       |  |       |  |       |  |       |  |       |  |       |  |       |  |       |  |       |  |       |  |       |  |       |  |       |  |       |  |       |  |       |  |       |  |       |  |       |  |       |  |       |  |       |  |       |  |       |  |       |  |       |  |       |  |       |  |       |  |       |  |       |  |       |  |       |  |       |  |       |  |       |  |       |  |       |  |       |  |       |  |       |  |       |  |       |  |       |  |       |  |       |  |       |  |       |  |       |  |       |  |       |  |       |  |       |  |       |  |       |  |       |  |       |  |       |  |       |  |       |  |       |  |       |  |       |  |       |  |       |  |       |  |       |  |       |  |       |  |       |  |       |  |       |  |       |  |       |  |       |  |       |  |       |  |       |  |       |  |       |  |       |  |       |  |       |  |       |  |       |  |       |  |       |  |       |  |       |  |       |  |       |  |       |  |       |  |       |  |       |  |       |  |       |  |       |  |       |  |       |  |       |  |       |  |       |  |       |  |       |  |       |  |       |  |       |  |       |  |       |  |       |  |       |  |       |  |       |  |       |  |       |  |       |  |       |  |       |  |       |  |       |  |       |  |       |  |       |  |       |  |       |  |       |  |       |  |       |  |       |  |       |  |       |  |       |  |       |  |       |  |       |  |       |  |       |  |       |  |       |  |       |  |       |  |       |  |       |  |       |  |       |  |       |  |       |  |       |  |       |  |       |  |       |  |       |  |       |  |       |  |       |  |       |  |       |  |       |  |       |  |       |  |       |  |       |  |       |  |       |  |       |  |       |  |       |  |       |  |       |  |       |  |       |  |       |  |       |  |       |  |       |  |       |  |       |  |       |  |       |  |       |  |       |  |       |  |       |  |       |  |       |  |       |  |       |  |       |  |       |  |       |  |       |  |       |  |       |  |       |  |       |  |       |  |       |  |       |  |       |  |       |  |       |  |       |  |       |  |       |  |       |  |       |  |       |  |       |  |       |  |       |  |       |  |       |  |       |  |       |  |       |  |       |  |       |  |       |  |       |  |       |  |       |  |       |  |       |  |       |  |       |  |       |  |       |  |       |  |       |  |       |  |       |  |       |  |       |  |       |  |       |  |       |  |       |  |       |  |       |  |       |  |       |  |       |  |       |  |       |  |       |  |       |  |       |  |       |  |       |  |       |  |       |  |       |  |       |  |       |  |       |  |       |  |       |  |       |  |       |  |       |  |       |  |       |  |       |  |       |  |       |  |       |  |       |  |       |  |       |  |       |  |       |  |       |  |       |  |       |  |       |  |       |  |       |  |       |  |       |  |       |  |       |  |       |  |       |  |       |  |       |  |       |  |       |  |       |  |       |  |       |  |       |  |       |  |       |  |       |  |       |  |       |  |       |  |       |  |       |  |       |  |       |  |       |  |       |  |       |  |       |  |       |  |       |  |       |  |       |  |       |  |       |  |       |  |       |  |       |  |       |  |       |  |       |  |       |  |       |  |       |  |       |  |       |  |       |  |       |  |       |  |       |  |       |  |       |  |       |  |       |  |       |  |       |  |       |  |       |  |       |  |       |  |       |  |       |  |       |  |       |  |       |  |       |  |       |  |       |  |       |  |       |  |       |  |       |  |       |  |       |  |       |  |       |  |       |  |       |  |       |  |       |  |       |  |       |  |       |  |       |  |       |  |       |  |       |  |       |  |       |  |       |  |       |  |       |  |       |  |       |  |       |  |       |  |       |  |       |  |       |  |       |  |       |  |       |  |       |  |       |  |       |  |       |  |       |  |       |  |       |  |       |  |       |  |       |  |       |  |       |  |       |  |       |  |       |  |       |  |       |  |       |  |       |  |       |  |       |  |       |  |       |  |       |  |       |  |       |  |       |  |       |  |       |  |       |  |       |  |       |  |       |  |       |  |       |  |       |  |       |  |       |  |       |  |       |  |       |  |       |  |       |  |       |  |       |  |       |  |       |  |       |  |       |  |       |  |       |  |       |  |       |  |       |  |       |  |       |  |       |  |       |  |       |  |       |  |       |  |       |  |       |  |       |  |       |  |       |  |       |  |       |  |       |  |       |  |       |  |       |  |       |  |       |  |       |  |       |  |       |  |       |  |
| 203245     | CC0091                    | CC1-MSSA                      | NEG                                      | NEG        | NEG          | NEG       | AMB    | NEG          | NEG       | NEG      | NEG      | NEG      | NEG      | NEG      | NEG      | NEG      | NEG    | NEG  | NEG    | NEG                      | NEG                      | NEG            | NEG                      | NEG                      | NEG            | 0             | 0      |      |               |  |                                          |  |      |  |      |  |      |  |      |  |      |  |      |  |      |  |      |  |      |  |      |  |      |  |      |  |       |  |       |  |       |  |       |  |       |  |       |  |       |  |       |  |       |  |       |  |       |  |       |  |       |  |       |  |       |  |       |  |       |  |       |  |       |  |       |  |       |  |       |  |       |  |       |  |       |  |       |  |       |  |       |  |       |  |       |  |       |  |       |  |       |  |       |  |       |  |       |  |       |  |       |  |       |  |       |  |       |  |       |  |       |  |       |  |       |  |       |  |       |  |       |  |       |  |       |  |       |  |       |  |       |  |       |  |       |  |       |  |       |  |       |  |       |  |       |  |       |  |       |  |       |  |       |  |       |  |       |  |       |  |       |  |       |  |       |  |       |  |       |  |       |  |       |  |       |  |       |  |       |  |       |  |       |  |       |  |       |  |       |  |       |  |       |  |       |  |       |  |       |  |       |  |       |  |       |  |       |  |       |  |       |  |       |  |       |  |       |  |       |  |       |  |       |  |       |  |       |  |       |  |       |  |       |  |       |  |       |  |       |  |       |  |       |  |       |  |       |  |       |  |       |  |       |  |       |  |       |  |       |  |       |  |       |  |       |  |       |  |       |  |       |  |       |  |       |  |       |  |       |  |       |  |       |  |       |  |       |  |       |  |       |  |       |  |       |  |       |  |       |  |       |  |       |  |       |  |       |  |       |  |       |  |       |  |       |  |       |  |       |  |       |  |       |  |       |  |       |  |       |  |       |  |       |  |       |  |       |  |       |  |       |  |       |  |       |  |       |  |       |  |       |  |       |  |       |  |       |  |       |  |       |  |       |  |       |  |       |  |       |  |       |  |       |  |       |  |       |  |       |  |       |  |       |  |       |  |       |  |       |  |       |  |       |  |       |  |       |  |       |  |       |  |       |  |       |  |       |  |       |  |       |  |       |  |       |  |       |  |       |  |       |  |       |  |       |  |       |  |       |  |       |  |       |  |       |  |       |  |       |  |       |  |       |  |       |  |       |  |       |  |       |  |       |  |       |  |       |  |       |  |       |  |       |  |       |  |       |  |       |  |       |  |       |  |       |  |       |  |       |  |       |  |       |  |       |  |       |  |       |  |       |  |       |  |       |  |       |  |       |  |       |  |       |  |       |  |       |  |       |  |       |  |       |  |       |  |       |  |       |  |       |  |       |  |       |  |       |  |       |  |       |  |       |  |       |  |       |  |       |  |       |  |       |  |       |  |       |  |       |  |       |  |       |  |       |  |       |  |       |  |       |  |       |  |       |  |       |  |       |  |       |  |       |  |       |  |       |  |       |  |       |  |       |  |       |  |       |  |       |  |       |  |       |  |       |  |       |  |       |  |       |  |       |  |       |  |       |  |       |  |       |  |       |  |       |  |       |  |       |  |       |  |       |  |       |  |       |  |       |  |       |  |       |  |       |  |       |  |       |  |       |  |       |  |       |  |       |  |       |  |       |  |       |  |       |  |       |  |       |  |       |  |       |  |       |  |       |  |       |  |       |  |       |  |       |  |       |  |       |  |       |  |       |  |       |  |       |  |       |  |       |  |       |  |       |  |       |  |       |  |       |  |       |  |       |  |       |  |       |  |       |  |       |  |       |  |       |  |       |  |       |  |       |  |       |  |       |  |       |  |       |  |       |  |       |  |       |  |       |  |       |  |       |  |       |  |       |  |       |  |       |  |       |  |       |  |       |  |       |  |       |  |       |  |       |  |       |  |       |  |       |  |       |  |       |  |       |  |       |  |       |  |       |  |       |  |       |  |       |  |       |  |       |  |       |  |       |  |       |  |       |  |       |  |       |  |       |  |       |  |       |  |       |  |       |  |       |  |       |  |       |  |       |  |       |  |       |  |       |  |       |  |       |  |       |  |       |  |       |  |       |  |       |  |       |  |       |  |       |  |       |  |       |  |       |  |       |  |       |  |       |  |       |  |       |  |       |  |       |  |       |  |       |  |       |  |       |  |       |  |       |  |       |  |       |  |       |  |       |  |       |  |       |  |       |  |       |  |       |  |       |  |       |  |       |  |       |  |       |  |       |  |       |  |       |  |       |  |       |  |       |  |       |  |       |  |       |  |       |  |       |  |       |  |       |  |       |  |       |  |       |  |       |  |       |  |       |  |       |  |       |  |       |  |       |  |       |  |       |  |       |  |       |  |       |  |       |  |       |  |       |  |       |  |       |  |       |  |       |  |       |  |       |  |       |  |       |  |       |  |       |  |       |  |       |  |       |  |       |  |       |  |       |  |       |  |       |  |       |  |       |  |       |  |       |  |       |  |       |  |       |  |       |  |       |  |       |  |       |  |       |  |       |  |       |  |       |  |       |  |       |  |       |  |       |  |       |  |       |  |       |  |       |  |       |  |       |  |       |  |       |  |       |  |       |  |       |  |       |  |       |  |       |  |       |  |       |  |       |  |       |  |       |  |       |  |       |  |       |  |       |  |       |  |       |  |       |  |       |  |       |  |       |  |       |  |       |  |       |  |       |  |       |  |       |  |       |  |       |  |       |  |       |  |       |  |       |  |       |  |       |  |       |  |       |  |       |  |       |  |       |  |       |  |       |  |       |  |       |  |       |  |       |  |       |  |       |  |       |  |       |  |       |  |       |  |       |  |       |  |       |  |       |  |       |  |       |  |       |  |       |  |       |  |       |  |       |  |       |  |       |  |       |  |       |  |       |  |       |  |       |  |       |  |       |  |       |  |       |  |       |  |       |  |       |  |       |  |       |  |       |  |       |  |       |  |       |  |       |  |       |  |       |  |       |  |       |  |       |  |       |  |       |  |       |  |       |  |       |  |       |  |       |  |       |  |       |  |       |  |       |  |       |  |       |  |       |  |       |  |       |  |       |  |       |  |       |  |       |  |       |  |       |  |       |  |       |  |       |  |       |  |       |  |       |  |       |  |       |  |       |  |       |  |       |  |       |  |       |  |       |  |       |  |       |  |       |  |       |  |       |  |       |  |       |  |       |  |       |  |       |  |       |  |       |  |       |  |       |  |       |  |       |  |       |  |       |  |       |  |       |  |       |  |       |  |       |  |       |  |       |  |       |  |       |  |       |  |       |  |       |  |
| 203246     | CC0091                    | CC1-MSSA                      | NEG                                      | NEG        | NEG          | NEG       | AMB    | NEG          | NEG       | NEG      | NEG      | NEG      | NEG      | NEG      | NEG      | NEG      | NEG    | NEG  | NEG    | NEG                      | NEG                      | NEG            | NEG                      | NEG                      | NEG            | 0             | 0      |      |               |  |                                          |  |      |  |      |  |      |  |      |  |      |  |      |  |      |  |      |  |      |  |      |  |      |  |      |  |       |  |       |  |       |  |       |  |       |  |       |  |       |  |       |  |       |  |       |  |       |  |       |  |       |  |       |  |       |  |       |  |       |  |       |  |       |  |       |  |       |  |       |  |       |  |       |  |       |  |       |  |       |  |       |  |       |  |       |  |       |  |       |  |       |  |       |  |       |  |       |  |       |  |       |  |       |  |       |  |       |  |       |  |       |  |       |  |       |  |       |  |       |  |       |  |       |  |       |  |       |  |       |  |       |  |       |  |       |  |       |  |       |  |       |  |       |  |       |  |       |  |       |  |       |  |       |  |       |  |       |  |       |  |       |  |       |  |       |  |       |  |       |  |       |  |       |  |       |  |       |  |       |  |       |  |       |  |       |  |       |  |       |  |       |  |       |  |       |  |       |  |       |  |       |  |       |  |       |  |       |  |       |  |       |  |       |  |       |  |       |  |       |  |       |  |       |  |       |  |       |  |       |  |       |  |       |  |       |  |       |  |       |  |       |  |       |  |       |  |       |  |       |  |       |  |       |  |       |  |       |  |       |  |       |  |       |  |       |  |       |  |       |  |       |  |       |  |       |  |       |  |       |  |       |  |       |  |       |  |       |  |       |  |       |  |       |  |       |  |       |  |       |  |       |  |       |  |       |  |       |  |       |  |       |  |       |  |       |  |       |  |       |  |       |  |       |  |       |  |       |  |       |  |       |  |       |  |       |  |       |  |       |  |       |  |       |  |       |  |       |  |       |  |       |  |       |  |       |  |       |  |       |  |       |  |       |  |       |  |       |  |       |  |       |  |       |  |       |  |       |  |       |  |       |  |       |  |       |  |       |  |       |  |       |  |       |  |       |  |       |  |       |  |       |  |       |  |       |  |       |  |       |  |       |  |       |  |       |  |       |  |       |  |       |  |       |  |       |  |       |  |       |  |       |  |       |  |       |  |       |  |       |  |       |  |       |  |       |  |       |  |       |  |       |  |       |  |       |  |       |  |       |  |       |  |       |  |       |  |       |  |       |  |       |  |       |  |       |  |       |  |       |  |       |  |       |  |       |  |       |  |       |  |       |  |       |  |       |  |       |  |       |  |       |  |       |  |       |  |       |  |       |  |       |  |       |  |       |  |       |  |       |  |       |  |       |  |       |  |       |  |       |  |       |  |       |  |       |  |       |  |       |  |       |  |       |  |       |  |       |  |       |  |       |  |       |  |       |  |       |  |       |  |       |  |       |  |       |  |       |  |       |  |       |  |       |  |       |  |       |  |       |  |       |  |       |  |       |  |       |  |       |  |       |  |       |  |       |  |       |  |       |  |       |  |       |  |       |  |       |  |       |  |       |  |       |  |       |  |       |  |       |  |       |  |       |  |       |  |       |  |       |  |       |  |       |  |       |  |       |  |       |  |       |  |       |  |       |  |       |  |       |  |       |  |       |  |       |  |       |  |       |  |       |  |       |  |       |  |       |  |       |  |       |  |       |  |       |  |       |  |       |  |       |  |       |  |       |  |       |  |       |  |       |  |       |  |       |  |       |  |       |  |       |  |       |  |       |  |       |  |       |  |       |  |       |  |       |  |       |  |       |  |       |  |       |  |       |  |       |  |       |  |       |  |       |  |       |  |       |  |       |  |       |  |       |  |       |  |       |  |       |  |       |  |       |  |       |  |       |  |       |  |       |  |       |  |       |  |       |  |       |  |       |  |       |  |       |  |       |  |       |  |       |  |       |  |       |  |       |  |       |  |       |  |       |  |       |  |       |  |       |  |       |  |       |  |       |  |       |  |       |  |       |  |       |  |       |  |       |  |       |  |       |  |       |  |       |  |       |  |       |  |       |  |       |  |       |  |       |  |       |  |       |  |       |  |       |  |       |  |       |  |       |  |       |  |       |  |       |  |       |  |       |  |       |  |       |  |       |  |       |  |       |  |       |  |       |  |       |  |       |  |       |  |       |  |       |  |       |  |       |  |       |  |       |  |       |  |       |  |       |  |       |  |       |  |       |  |       |  |       |  |       |  |       |  |       |  |       |  |       |  |       |  |       |  |       |  |       |  |       |  |       |  |       |  |       |  |       |  |       |  |       |  |       |  |       |  |       |  |       |  |       |  |       |  |       |  |       |  |       |  |       |  |       |  |       |  |       |  |       |  |       |  |       |  |       |  |       |  |       |  |       |  |       |  |       |  |       |  |       |  |       |  |       |  |       |  |       |  |       |  |       |  |       |  |       |  |       |  |       |  |       |  |       |  |       |  |       |  |       |  |       |  |       |  |       |  |       |  |       |  |       |  |       |  |       |  |       |  |       |  |       |  |       |  |       |  |       |  |       |  |       |  |       |  |       |  |       |  |       |  |       |  |       |  |       |  |       |  |       |  |       |  |       |  |       |  |       |  |       |  |       |  |       |  |       |  |       |  |       |  |       |  |       |  |       |  |       |  |       |  |       |  |       |  |       |  |       |  |       |  |       |  |       |  |       |  |       |  |       |  |       |  |       |  |       |  |       |  |       |  |       |  |       |  |       |  |       |  |       |  |       |  |       |  |       |  |       |  |       |  |       |  |       |  |       |  |       |  |       |  |       |  |       |  |       |  |       |  |       |  |       |  |       |  |       |  |       |  |       |  |       |  |       |  |       |  |       |  |       |  |       |  |       |  |       |  |       |  |       |  |       |  |       |  |       |  |       |  |       |  |       |  |       |  |       |  |       |  |       |  |       |  |       |  |       |  |       |  |       |  |       |  |       |  |       |  |       |  |       |  |       |  |       |  |       |  |       |  |       |  |       |  |       |  |       |  |       |  |       |  |       |  |       |  |       |  |       |  |       |  |       |  |       |  |       |  |       |  |       |  |       |  |       |  |       |  |       |  |       |  |       |  |       |  |       |  |       |  |       |  |       |  |       |  |       |  |       |  |       |  |       |  |       |  |       |  |       |  |       |  |       |  |       |  |       |  |       |  |       |  |       |  |       |  |       |  |       |  |       |  |       |  |       |  |       |  |       |  |       |  |       |  |       |  |       |  |       |  |       |  |       |  |       |  |       |  |       |  |       |  |       |  |
| 203247     | CC0091                    | CC1-MSSA                      | NEG                                      | NEG        | NEG          | NEG       | AMB    | NEG          | NEG       | NEG      | NEG      | NEG      | NEG      | NEG      | NEG      | NEG      | NEG    | NEG  | NEG    | NEG                      | NEG                      | NEG            | NEG                      | NEG                      | NEG            | 0             | 0      |      |               |  |                                          |  |      |  |      |  |      |  |      |  |      |  |      |  |      |  |      |  |      |  |      |  |      |  |      |  |       |  |       |  |       |  |       |  |       |  |       |  |       |  |       |  |       |  |       |  |       |  |       |  |       |  |       |  |       |  |       |  |       |  |       |  |       |  |       |  |       |  |       |  |       |  |       |  |       |  |       |  |       |  |       |  |       |  |       |  |       |  |       |  |       |  |       |  |       |  |       |  |       |  |       |  |       |  |       |  |       |  |       |  |       |  |       |  |       |  |       |  |       |  |       |  |       |  |       |  |       |  |       |  |       |  |       |  |       |  |       |  |       |  |       |  |       |  |       |  |       |  |       |  |       |  |       |  |       |  |       |  |       |  |       |  |       |  |       |  |       |  |       |  |       |  |       |  |       |  |       |  |       |  |       |  |       |  |       |  |       |  |       |  |       |  |       |  |       |  |       |  |       |  |       |  |       |  |       |  |       |  |       |  |       |  |       |  |       |  |       |  |       |  |       |  |       |  |       |  |       |  |       |  |       |  |       |  |       |  |       |  |       |  |       |  |       |  |       |  |       |  |       |  |       |  |       |  |       |  |       |  |       |  |       |  |       |  |       |  |       |  |       |  |       |  |       |  |       |  |       |  |       |  |       |  |       |  |       |  |       |  |       |  |       |  |       |  |       |  |       |  |       |  |       |  |       |  |       |  |       |  |       |  |       |  |       |  |       |  |       |  |       |  |       |  |       |  |       |  |       |  |       |  |       |  |       |  |       |  |       |  |       |  |       |  |       |  |       |  |       |  |       |  |       |  |       |  |       |  |       |  |       |  |       |  |       |  |       |  |       |  |       |  |       |  |       |  |       |  |       |  |       |  |       |  |       |  |       |  |       |  |       |  |       |  |       |  |       |  |       |  |       |  |       |  |       |  |       |  |       |  |       |  |       |  |       |  |       |  |       |  |       |  |       |  |       |  |       |  |       |  |       |  |       |  |       |  |       |  |       |  |       |  |       |  |       |  |       |  |       |  |       |  |       |  |       |  |       |  |       |  |       |  |       |  |       |  |       |  |       |  |       |  |       |  |       |  |       |  |       |  |       |  |       |  |       |  |       |  |       |  |       |  |       |  |       |  |       |  |       |  |       |  |       |  |       |  |       |  |       |  |       |  |       |  |       |  |       |  |       |  |       |  |       |  |       |  |       |  |       |  |       |  |       |  |       |  |       |  |       |  |       |  |       |  |       |  |       |  |       |  |       |  |       |  |       |  |       |  |       |  |       |  |       |  |       |  |       |  |       |  |       |  |       |  |       |  |       |  |       |  |       |  |       |  |       |  |       |  |       |  |       |  |       |  |       |  |       |  |       |  |       |  |       |  |       |  |       |  |       |  |       |  |       |  |       |  |       |  |       |  |       |  |       |  |       |  |       |  |       |  |       |  |       |  |       |  |       |  |       |  |       |  |       |  |       |  |       |  |       |  |       |  |       |  |       |  |       |  |       |  |       |  |       |  |       |  |       |  |       |  |       |  |       |  |       |  |       |  |       |  |       |  |       |  |       |  |       |  |       |  |       |  |       |  |       |  |       |  |       |  |       |  |       |  |       |  |       |  |       |  |       |  |       |  |       |  |       |  |       |  |       |  |       |  |       |  |       |  |       |  |       |  |       |  |       |  |       |  |       |  |       |  |       |  |       |  |       |  |       |  |       |  |       |  |       |  |       |  |       |  |       |  |       |  |       |  |       |  |       |  |       |  |       |  |       |  |       |  |       |  |       |  |       |  |       |  |       |  |       |  |       |  |       |  |       |  |       |  |       |  |       |  |       |  |       |  |       |  |       |  |       |  |       |  |       |  |       |  |       |  |       |  |       |  |       |  |       |  |       |  |       |  |       |  |       |  |       |  |       |  |       |  |       |  |       |  |       |  |       |  |       |  |       |  |       |  |       |  |       |  |       |  |       |  |       |  |       |  |       |  |       |  |       |  |       |  |       |  |       |  |       |  |       |  |       |  |       |  |       |  |       |  |       |  |       |  |       |  |       |  |       |  |       |  |       |  |       |  |       |  |       |  |       |  |       |  |       |  |       |  |       |  |       |  |       |  |       |  |       |  |       |  |       |  |       |  |       |  |       |  |       |  |       |  |       |  |       |  |       |  |       |  |       |  |       |  |       |  |       |  |       |  |       |  |       |  |       |  |       |  |       |  |       |  |       |  |       |  |       |  |       |  |       |  |       |  |       |  |       |  |       |  |       |  |       |  |       |  |       |  |       |  |       |  |       |  |       |  |       |  |       |  |       |  |       |  |       |  |       |  |       |  |       |  |       |  |       |  |       |  |       |  |       |  |       |  |       |  |       |  |       |  |       |  |       |  |       |  |       |  |       |  |       |  |       |  |       |  |       |  |       |  |       |  |       |  |       |  |       |  |       |  |       |  |       |  |       |  |       |  |       |  |       |  |       |  |       |  |       |  |       |  |       |  |       |  |       |  |       |  |       |  |       |  |       |  |       |  |       |  |       |  |       |  |       |  |       |  |       |  |       |  |       |  |       |  |       |  |       |  |       |  |       |  |       |  |       |  |       |  |       |  |       |  |       |  |       |  |       |  |       |  |       |  |       |  |       |  |       |  |       |  |       |  |       |  |       |  |       |  |       |  |       |  |       |  |       |  |       |  |       |  |       |  |       |  |       |  |       |  |       |  |       |  |       |  |       |  |       |  |       |  |       |  |       |  |       |  |       |  |       |  |       |  |       |  |       |  |       |  |       |  |       |  |       |  |       |  |       |  |       |  |       |  |       |  |       |  |       |  |       |  |       |  |       |  |       |  |       |  |       |  |       |  |       |  |       |  |       |  |       |  |       |  |       |  |       |  |       |  |       |  |       |  |       |  |       |  |       |  |       |  |       |  |       |  |       |  |       |  |       |  |       |  |       |  |       |  |       |  |       |  |       |  |       |  |       |  |       |  |       |  |       |  |       |  |       |  |       |  |       |  |       |  |       |  |       |  |       |  |       |  |       |  |       |  |       |  |       |  |       |  |       |  |       |  |       |  |       |  |       |  |       |  |       |  |       |  |       |  |       |  |       |  |       |  |       |  |       |  |       |  |       |  |
| 203248     | CC0091                    | CC1-MSSA                      | NEG                                      | NEG        | NEG          | NEG       | AMB</  |              |           |          |          |          |          |          |          |          |        |      |        |                          |                          |                |                          |                          |                |               |        |      |               |  |                                          |  |      |  |      |  |      |  |      |  |      |  |      |  |      |  |      |  |      |  |      |  |      |  |      |  |       |  |       |  |       |  |       |  |       |  |       |  |       |  |       |  |       |  |       |  |       |  |       |  |       |  |       |  |       |  |       |  |       |  |       |  |       |  |       |  |       |  |       |  |       |  |       |  |       |  |       |  |       |  |       |  |       |  |       |  |       |  |       |  |       |  |       |  |       |  |       |  |       |  |       |  |       |  |       |  |       |  |       |  |       |  |       |  |       |  |       |  |       |  |       |  |       |  |       |  |       |  |       |  |       |  |       |  |       |  |       |  |       |  |       |  |       |  |       |  |       |  |       |  |       |  |       |  |       |  |       |  |       |  |       |  |       |  |       |  |       |  |       |  |       |  |       |  |       |  |       |  |       |  |       |  |       |  |       |  |       |  |       |  |       |  |       |  |       |  |       |  |       |  |       |  |       |  |       |  |       |  |       |  |       |  |       |  |       |  |       |  |       |  |       |  |       |  |       |  |       |  |       |  |       |  |       |  |       |  |       |  |       |  |       |  |       |  |       |  |       |  |       |  |       |  |       |  |       |  |       |  |       |  |       |  |       |  |       |  |       |  |       |  |       |  |       |  |       |  |       |  |       |  |       |  |       |  |       |  |       |  |       |  |       |  |       |  |       |  |       |  |       |  |       |  |       |  |       |  |       |  |       |  |       |  |       |  |       |  |       |  |       |  |       |  |       |  |       |  |       |  |       |  |       |  |       |  |       |  |       |  |       |  |       |  |       |  |       |  |       |  |       |  |       |  |       |  |       |  |       |  |       |  |       |  |       |  |       |  |       |  |       |  |       |  |       |  |       |  |       |  |       |  |       |  |       |  |       |  |       |  |       |  |       |  |       |  |       |  |       |  |       |  |       |  |       |  |       |  |       |  |       |  |       |  |       |  |       |  |       |  |       |  |       |  |       |  |       |  |       |  |       |  |       |  |       |  |       |  |       |  |       |  |       |  |       |  |       |  |       |  |       |  |       |  |       |  |       |  |       |  |       |  |       |  |       |  |       |  |       |  |       |  |       |  |       |  |       |  |       |  |       |  |       |  |       |  |       |  |       |  |       |  |       |  |       |  |       |  |       |  |       |  |       |  |       |  |       |  |       |  |       |  |       |  |       |  |       |  |       |  |       |  |       |  |       |  |       |  |       |  |       |  |       |  |       |  |       |  |       |  |       |  |       |  |       |  |       |  |       |  |       |  |       |  |       |  |       |  |       |  |       |  |       |  |       |  |       |  |       |  |       |  |       |  |       |  |       |  |       |  |       |  |       |  |       |  |       |  |       |  |       |  |       |  |       |  |       |  |       |  |       |  |       |  |       |  |       |  |       |  |       |  |       |  |       |  |       |  |       |  |       |  |       |  |       |  |       |  |       |  |       |  |       |  |       |  |       |  |       |  |       |  |       |  |       |  |       |  |       |  |       |  |       |  |       |  |       |  |       |  |       |  |       |  |       |  |       |  |       |  |       |  |       |  |       |  |       |  |       |  |       |  |       |  |       |  |       |  |       |  |       |  |       |  |       |  |       |  |       |  |       |  |       |  |       |  |       |  |       |  |       |  |       |  |       |  |       |  |       |  |       |  |       |  |       |  |       |  |       |  |       |  |       |  |       |  |       |  |       |  |       |  |       |  |       |  |       |  |       |  |       |  |       |  |       |  |       |  |       |  |       |  |       |  |       |  |       |  |       |  |       |  |       |  |       |  |       |  |       |  |       |  |       |  |       |  |       |  |       |  |       |  |       |  |       |  |       |  |       |  |       |  |       |  |       |  |       |  |       |  |       |  |       |  |       |  |       |  |       |  |       |  |       |  |       |  |       |  |       |  |       |  |       |  |       |  |       |  |       |  |       |  |       |  |       |  |       |  |       |  |       |  |       |  |       |  |       |  |       |  |       |  |       |  |       |  |       |  |       |  |       |  |       |  |       |  |       |  |       |  |       |  |       |  |       |  |       |  |       |  |       |  |       |  |       |  |       |  |       |  |       |  |       |  |       |  |       |  |       |  |       |  |       |  |       |  |       |  |       |  |       |  |       |  |       |  |       |  |       |  |       |  |       |  |       |  |       |  |       |  |       |  |       |  |       |  |       |  |       |  |       |  |       |  |       |  |       |  |       |  |       |  |       |  |       |  |       |  |       |  |       |  |       |  |       |  |       |  |       |  |       |  |       |  |       |  |       |  |       |  |       |  |       |  |       |  |       |  |       |  |       |  |       |  |       |  |       |  |       |  |       |  |       |  |       |  |       |  |       |  |       |  |       |  |       |  |       |  |       |  |       |  |       |  |       |  |       |  |       |  |       |  |       |  |       |  |       |  |       |  |       |  |       |  |       |  |       |  |       |  |       |  |       |  |       |  |       |  |       |  |       |  |       |  |       |  |       |  |       |  |       |  |       |  |       |  |       |  |       |  |       |  |       |  |       |  |       |  |       |  |       |  |       |  |       |  |       |  |       |  |       |  |       |  |       |  |       |  |       |  |       |  |       |  |       |  |       |  |       |  |       |  |       |  |       |  |       |  |       |  |       |  |       |  |       |  |       |  |       |  |       |  |       |  |       |  |       |  |       |  |       |  |       |  |       |  |       |  |       |  |       |  |       |  |       |  |       |  |       |  |       |  |       |  |       |  |       |  |       |  |       |  |       |  |       |  |       |  |       |  |       |  |       |  |       |  |       |  |       |  |       |  |       |  |       |  |       |  |       |  |       |  |       |  |       |  |       |  |       |  |       |  |       |  |       |  |       |  |       |  |       |  |       |  |       |  |       |  |       |  |       |  |       |  |       |  |       |  |       |  |       |  |       |  |       |  |       |  |       |  |       |  |       |  |       |  |       |  |       |  |       |  |       |  |       |  |       |  |       |  |       |  |       |  |       |  |       |  |       |  |       |  |       |  |       |  |       |  |       |  |       |  |       |  |       |  |       |  |       |  |       |  |       |  |       |  |       |  |       |  |       |  |       |  |       |  |       |  |       |  |       |  |       |  |       |  |       |  |       |  |       |  |       |  |       |  |       |  |       |  |       |  |       |  |       |  |       |  |       |  |       |  |       |  |





















| ISOLATE ID | CLONAL COMPLEX (by array) | STRAIN AFFILIATION (by array) | ADHESION FACTORS / MSCRAMM GENES                                  |             |                |             |              |                                       |            |               |              |            |             | IMMUNOD. AG. B           |               |                | DEFENSEN RESIST.           |             | TRANSFERRIN BINDING PROT.   |                          |                         | PUTATIVE TRANSPORTERS                                           |              |              |     |     |
|------------|---------------------------|-------------------------------|-------------------------------------------------------------------|-------------|----------------|-------------|--------------|---------------------------------------|------------|---------------|--------------|------------|-------------|--------------------------|---------------|----------------|----------------------------|-------------|-----------------------------|--------------------------|-------------------------|-----------------------------------------------------------------|--------------|--------------|-----|-----|
|            |                           |                               | Der. Agg. fctn. ribh. fibron. bios. autotransp.-binding protein D |             |                |             |              | van Willebrand factor binding protein |            |               |              |            |             | immunodominant antigen B |               |                | defense resistance protein |             | transferrin-binding protein |                          |                         | hydrophobic protein, located in integral membrane protein "Lsp" |              |              |     |     |
|            |                           |                               | sdrD                                                              | sdrD (cons) | sdrD (COL-MW2) | sdrD (Mu50) | sdrD (other) | vwb                                   | vwb (cons) | vwb (COL-MW2) | vwb (MRS252) | vwb (Mu50) | vwb (RF122) | isaB                     | isaB (MRS252) | mpfF (COL-MW2) | mpfF (Mu50+252)            | isaA (cons) | isaA (MRS252)               | isaA (Other Than MRS252) | ImpF (Other Than RF122) | ImpF (Other Than RF122)                                         | ImpP (RF122) | ImpP (RF122) |     |     |
| 203228     | CC0091                    | CC1-MSSA                      | POS                                                               | POS         | NEG            | NEG         | NEG          | POS                                   | POS        | POS           | NEG          | NEG        | NEG         | NEG                      | POS           | AMB            | AMB                        | POS         | POS                         | POS                      | POS                     | POS                                                             | AMB          | NEG          |     |     |
| 203229     | CC0091                    | CC1-MSSA                      | POS                                                               | POS         | POS            | NEG         | NEG          | POS                                   | POS        | POS           | NEG          | NEG        | NEG         | AMB                      | POS           | AMB            | POS                        | AMB         | POS                         | POS                      | POS                     | POS                                                             | POS          | NEG          | NEG |     |
| 203233     | CC0091                    | CC1-MSSA                      | POS                                                               | POS         | POS            | NEG         | NEG          | POS                                   | POS        | POS           | NEG          | NEG        | NEG         | POS                      | AMB           | AMB            | POS                        | AMB         | POS                         | POS                      | POS                     | POS                                                             | POS          | NEG          | NEG |     |
| 203234     | CC0091                    | CC1-MSSA                      | POS                                                               | POS         | NEG            | NEG         | NEG          | POS                                   | POS        | POS           | NEG          | NEG        | NEG         | POS                      | AMB           | AMB            | POS                        | AMB         | POS                         | POS                      | POS                     | POS                                                             | POS          | NEG          | NEG |     |
| 229261     | CC0091                    | CC1-MSSA                      | POS                                                               | POS         | POS            | NEG         | NEG          | POS                                   | POS        | POS           | NEG          | NEG        | NEG         | AMB                      | POS           | AMB            | POS                        | AMB         | POS                         | POS                      | POS                     | POS                                                             | POS          | NEG          | NEG |     |
| 289172     | CC0091                    | CC1-MSSA                      | POS                                                               | POS         | NEG            | NEG         | NEG          | POS                                   | POS        | POS           | NEG          | NEG        | NEG         | AMB                      | POS           | AMB            | POS                        | AMB         | POS                         | POS                      | POS                     | POS                                                             | POS          | NEG          | NEG |     |
| 289124     | CC0091                    | CC1-MRS4-V, WA MSSA-157       | POS                                                               | POS         | POS            | NEG         | NEG          | POS                                   | POS        | POS           | NEG          | NEG        | NEG         | POS                      | AMB           | POS            | AMB                        | POS         | AMB                         | POS                      | POS                     | POS                                                             | POS          | NEG          | NEG |     |
| 275170     | CC0095                    | CC5-MSSA                      | POS                                                               | POS         | NEG            | POS         | NEG          | POS                                   | POS        | POS           | NEG          | NEG        | NEG         | POS                      | AMB           | AMB            | POS                        | POS         | NEG                         | POS                      | POS                     | POS                                                             | POS          | NEG          | NEG |     |
| 275171     | CC0095                    | CC5-MSSA                      | POS                                                               | POS         | NEG            | POS         | NEG          | POS                                   | POS        | POS           | NEG          | NEG        | NEG         | POS                      | AMB           | AMB            | POS                        | POS         | NEG                         | POS                      | POS                     | POS                                                             | POS          | NEG          | NEG |     |
| 112747     | CC0095                    | CC5-MSSA                      | NEG                                                               | NEG         | NEG            | NEG         | NEG          | POS                                   | POS        | NEG           | NEG          | NEG        | POS         | AMB                      | AMB           | POS            | POS                        | NEG         | POS                         | POS                      | POS                     | POS                                                             | POS          | NEG          | NEG |     |
| 112752     | CC0095                    | CC5-MSSA                      | POS                                                               | POS         | NEG            | POS         | NEG          | POS                                   | POS        | POS           | NEG          | NEG        | NEG         | POS                      | AMB           | POS            | AMB                        | POS         | NEG                         | POS                      | POS                     | POS                                                             | POS          | NEG          | NEG |     |
| 275178     | CC0097                    | CC7-MSSA                      | POS                                                               | POS         | NEG            | POS         | NEG          | POS                                   | POS        | POS           | NEG          | NEG        | NEG         | POS                      | AMB           | POS            | AMB                        | POS         | NEG                         | POS                      | POS                     | POS                                                             | POS          | NEG          | NEG |     |
| 275186     | CC0098                    | CC8-MSSA                      | POS                                                               | POS         | NEG            | POS         | NEG          | POS                                   | POS        | POS           | NEG          | NEG        | NEG         | POS                      | AMB           | POS            | AMB                        | POS         | NEG                         | POS                      | POS                     | POS                                                             | POS          | NEG          | NEG |     |
| 275176     | CC0098                    | CC8-MSSA                      | POS                                                               | POS         | POS            | NEG         | NEG          | POS                                   | POS        | POS           | NEG          | NEG        | NEG         | POS                      | AMB           | POS            | AMB                        | POS         | NEG                         | POS                      | POS                     | POS                                                             | POS          | NEG          | NEG |     |
| 275177     | CC0098                    | CC8-MSSA                      | POS                                                               | POS         | POS            | NEG         | NEG          | POS                                   | POS        | POS           | NEG          | NEG        | NEG         | POS                      | AMB           | POS            | AMB                        | POS         | NEG                         | POS                      | POS                     | POS                                                             | POS          | NEG          | NEG |     |
| 275187     | CC0098                    | CC8-MSSA                      | POS                                                               | POS         | NEG            | POS         | NEG          | POS                                   | POS        | POS           | NEG          | NEG        | NEG         | POS                      | AMB           | POS            | AMB                        | POS         | NEG                         | POS                      | POS                     | POS                                                             | POS          | NEG          | NEG |     |
| 170968     | CC0012                    | CC12-MSSA                     | POS                                                               | POS         | POS            | NEG         | NEG          | POS                                   | POS        | POS           | NEG          | NEG        | NEG         | POS                      | AMB           | POS            | AMB                        | POS         | NEG                         | POS                      | POS                     | POS                                                             | POS          | NEG          | NEG |     |
| 275175     | CC0015                    | CC15-MSSA                     | POS                                                               | POS         | NEG            | POS         | NEG          | POS                                   | POS        | POS           | NEG          | NEG        | NEG         | POS                      | AMB           | POS            | AMB                        | POS         | POS                         | NEG                      | POS                     | POS                                                             | POS          | NEG          | NEG |     |
| 170949     | CC0015                    | CC15-MSSA                     | POS                                                               | POS         | NEG            | POS         | NEG          | POS                                   | POS        | POS           | NEG          | NEG        | NEG         | POS                      | AMB           | POS            | AMB                        | POS         | POS                         | NEG                      | POS                     | POS                                                             | POS          | NEG          | NEG |     |
| 228558     | CC0022                    | CC22-MSSA                     | POS                                                               | POS         | NEG            | NEG         | POS          | POS                                   | POS        | POS           | NEG          | NEG        | NEG         | POS                      | AMB           | POS            | POS                        | AMB         | POS                         | POS                      | POS                     | POS                                                             | POS          | NEG          | NEG |     |
| 289125     | CC0022                    | CC22-MRS4-V (PV-L)            | POS                                                               | POS         | NEG            | NEG         | POS          | POS                                   | POS        | POS           | NEG          | NEG        | NEG         | POS                      | AMB           | POS            | POS                        | AMB         | POS                         | POS                      | POS                     | POS                                                             | POS          | NEG          | NEG |     |
| 289126     | CC0022                    | CC22-MRS4-V (PV-L)            | POS                                                               | POS         | NEG            | NEG         | POS          | POS                                   | POS        | POS           | NEG          | NEG        | NEG         | POS                      | AMB           | POS            | POS                        | AMB         | POS                         | NEG                      | POS                     | POS                                                             | POS          | NEG          | NEG |     |
| 289127     | CC0022                    | CC22-MRS4-V (PV-L)            | POS                                                               | POS         | NEG            | NEG         | POS          | POS                                   | POS        | POS           | NEG          | NEG        | NEG         | POS                      | AMB           | POS            | POS                        | AMB         | POS                         | NEG                      | POS                     | POS                                                             | POS          | NEG          | NEG |     |
| 131839     | CC0025                    | CC25-MSSA                     | NEG                                                               | NEG         | NEG            | NEG         | NEG          | POS                                   | POS        | NEG           | NEG          | NEG        | NEG         | POS                      | AMB           | AMB            | POS                        | POS         | NEG                         | POS                      | POS                     | POS                                                             | POS          | NEG          | NEG |     |
| 275185     | CC0030                    | CC30-MSSA (huF-P-PS3huM+)     | POS                                                               | POS         | NEG            | NEG         | POS          | POS                                   | POS        | POS           | NEG          | NEG        | NEG         | POS                      | AMB           | POS            | POS                        | POS         | NEG                         | POS                      | POS                     | POS                                                             | POS          | NEG          | NEG |     |
| 275174     | CC0030                    | CC30-MSSA                     | POS                                                               | POS         | NEG            | NEG         | POS          | POS                                   | POS        | POS           | NEG          | NEG        | NEG         | POS                      | AMB           | POS            | POS                        | POS         | NEG                         | POS                      | POS                     | POS                                                             | POS          | NEG          | NEG |     |
| 124292     | CC0049                    | CC49-MSSA (huF-P-PS3huM+)     | POS                                                               | NEG         | NEG            | NEG         | POS          | POS                                   | POS        | POS           | NEG          | NEG        | NEG         | POS                      | AMB           | POS            | POS                        | NEG         | POS                         | NEG                      | POS                     | POS                                                             | POS          | NEG          | NEG |     |
| 229016     | CC0049                    | CC49-MSSA (huF-P-PS3huM+)     | POS                                                               | POS         | NEG            | NEG         | POS          | POS                                   | POS        | POS           | NEG          | NEG        | NEG         | AMB                      | NEG           | POS            | AMB                        | POS         | NEG                         | POS                      | NEG                     | POS                                                             | NEG          | NEG          | POS |     |
| 229049     | CC0049                    | CC49-MSSA (huF-P-PS3huM+)     | POS                                                               | POS         | NEG            | NEG         | POS          | POS                                   | POS        | POS           | NEG          | NEG        | NEG         | AMB                      | NEG           | POS            | AMB                        | POS         | NEG                         | POS                      | NEG                     | POS                                                             | NEG          | NEG          | POS |     |
| 180994     | CC0059                    | CC59-MSSA                     | POS                                                               | POS         | NEG            | NEG         | POS          | POS                                   | POS        | POS           | NEG          | NEG        | NEG         | POS                      | AMB           | POS            | POS                        | NEG         | POS                         | NEG                      | POS                     | POS                                                             | POS          | NEG          | NEG |     |
| 275172     | CC0088                    | CC88-MSSA                     | POS                                                               | POS         | NEG            | NEG         | POS          | POS                                   | POS        | POS           | NEG          | NEG        | NEG         | POS                      | AMB           | POS            | NEG                        | POS         | NEG                         | POS                      | POS                     | POS                                                             | POS          | NEG          | NEG |     |
| 275173     | CC0088                    | CC88-MSSA                     | POS                                                               | POS         | NEG            | NEG         | POS          | POS                                   | POS        | POS           | NEG          | NEG        | NEG         | POS                      | AMB           | POS            | AMB                        | POS         | NEG                         | POS                      | POS                     | POS                                                             | POS          | NEG          | NEG |     |
| 275174     | CC0088                    | CC88-MSSA                     | POS                                                               | POS         | NEG            | NEG         | POS          | POS                                   | POS        | POS           | NEG          | NEG        | NEG         | POS                      | AMB           | POS            | AMB                        | POS         | NEG                         | POS                      | POS                     | POS                                                             | POS          | NEG          | NEG |     |
| 170971     | CC0097                    | CC97-MSSA                     | NEG                                                               | NEG         | NEG            | NEG         | NEG          | POS                                   | POS        | NEG           | NEG          | NEG        | NEG         | POS                      | AMB           | POS            | AMB                        | POS         | NEG                         | POS                      | POS                     | POS                                                             | POS          | NEG          | NEG |     |
| 112745     | CC0097                    | CC97-MSSA                     | POS                                                               | POS         | NEG            | POS         | NEG          | POS                                   | POS        | POS           | NEG          | NEG        | NEG         | POS                      | AMB           | POS            | AMB                        | POS         | NEG                         | POS                      | POS                     | POS                                                             | POS          | NEG          | NEG |     |
| 112748     | CC0097                    | CC97-MSSA                     | POS                                                               | POS         | NEG            | POS         | NEG          | POS                                   | POS        | POS           | NEG          | NEG        | NEG         | POS                      | AMB           | POS            | AMB                        | POS         | NEG                         | POS                      | POS                     | POS                                                             | POS          | NEG          | NEG |     |
| 112750     | CC0097                    | CC97-MSSA                     | POS                                                               | POS         | NEG            | POS         | NEG          | POS                                   | POS        | POS           | NEG          | NEG        | NEG         | POS                      | AMB           | POS            | AMB                        | POS         | NEG                         | POS                      | POS                     | POS                                                             | POS          | NEG          | NEG |     |
| 112762     | CC0097                    | CC97-MSSA                     | POS                                                               | POS         | NEG            | POS         | NEG          | POS                                   | POS        | POS           | NEG          | NEG        | NEG         | POS                      | AMB           | POS            | AMB                        | POS         | NEG                         | POS                      | POS                     | POS                                                             | POS          | NEG          | NEG |     |
| 112763     | CC0097                    | CC97-MSSA                     | POS                                                               | POS         | NEG            | POS         | NEG          | POS                                   | POS        | POS           | NEG          | NEG        | NEG         | POS                      | AMB           | POS            | AMB                        | POS         | NEG                         | POS                      | POS                     | POS                                                             | POS          | NEG          | NEG |     |
| 112764     | CC0097                    | CC97-MSSA                     | POS                                                               | POS         | NEG            | POS         | NEG          | POS                                   | POS        | POS           | NEG          | NEG        | NEG         | POS                      | AMB           | POS            | AMB                        | POS         | NEG                         | POS                      | POS                     | POS                                                             | POS          | NEG          | NEG |     |
| 170945     | CC0097                    | CC97-MSSA                     | POS                                                               | POS         | NEG            | POS         | NEG          | POS                                   | POS        | POS           | NEG          | NEG        | NEG         | POS                      | AMB           | POS            | AMB                        | POS         | NEG                         | POS                      | POS                     | POS                                                             | POS          | NEG          | NEG |     |
| 170954     | CC0097                    | CC97-MSSA                     | POS                                                               | POS         | NEG            | POS         | NEG          | POS                                   | POS        | POS           | NEG          | NEG        | NEG         | POS                      | AMB           | POS            | AMB                        | POS         | NEG                         | POS                      | POS                     | POS                                                             | POS          | NEG          | NEG |     |
| 170963     | CC0097                    | CC97-MSSA                     | POS                                                               | POS         | NEG            | POS         | NEG          | POS                                   | POS        | POS           | NEG          | NEG        | NEG         | POS                      | AMB           | POS            | AMB                        | POS         | NEG                         | POS                      | POS                     | POS                                                             | POS          | NEG          | NEG |     |
| 170963     | CC0097                    | CC97-MSSA                     | POS                                                               | POS         | NEG            | POS         | NEG          | POS                                   | POS        | POS           | NEG          | NEG        | NEG         | POS                      | AMB           | POS            | AMB                        | POS         | NEG                         | POS                      | POS                     | POS                                                             | POS          | NEG          | NEG |     |
| 170964     | CC0097                    | CC97-MSSA                     | POS                                                               | POS         | NEG            | POS         | NEG          | POS                                   | POS        | POS           | NEG          | NEG        | NEG         | POS                      | AMB           | POS            | AMB                        | POS         | NEG                         | POS                      | POS                     | POS                                                             | POS          | NEG          | NEG |     |
| 170965     | CC0097                    | CC97-MSSA                     | POS                                                               | POS         | NEG            | POS         | NEG          | POS                                   | POS        | POS           | NEG          | NEG        | NEG         | POS                      | AMB           | POS            | AMB                        | POS         | NEG                         | POS                      | POS                     | POS                                                             | POS          | NEG          | NEG |     |
| 170966     | CC0097                    | CC97-MSSA                     | POS                                                               | POS         | NEG            | POS         | NEG          | POS                                   | POS        | POS           | NEG          | NEG        | NEG         | POS                      | AMB           | POS            | AMB                        | POS         | NEG                         | POS                      | POS                     | POS                                                             | POS          | NEG          | NEG |     |
| 170974     | CC0097                    | CC97-MSSA                     | POS                                                               | POS         | NEG            | POS         | NEG          | POS                                   | POS        | POS           | NEG          | NEG        | NEG         | POS                      | AMB           | POS            | AMB                        | POS         | NEG                         | POS                      | POS                     | POS                                                             | POS          | NEG          | NEG |     |
| 170976     | CC0097                    | CC97-MSSA                     | POS                                                               | POS         | NEG            | POS         | NEG          | POS                                   | POS        | POS           | NEG          | NEG        | NEG         | POS                      | AMB           | POS            | AMB                        | POS         | NEG                         | POS                      | POS                     | POS                                                             | POS          | NEG          | NEG |     |
| 112744     | CC0097                    | CC97-MSSA                     | POS                                                               | POS         | NEG            | POS         | NEG          | POS                                   | POS        | POS           | NEG          | NEG        | NEG         | POS                      | AMB           | POS            | AMB                        | POS         | NEG                         | POS                      | POS                     | POS                                                             | POS          | NEG          | NEG |     |
| 112748     | CC0097                    | CC97-MSSA                     | POS                                                               | POS         | NEG            | POS         | NEG          | POS                                   | POS        | POS           | NEG          | NEG        | NEG         | POS                      | AMB           | POS            | AMB                        | POS         | NEG                         | POS                      | POS                     | POS                                                             | POS          | NEG          | NEG |     |
| 112749     | CC0097                    | CC97-MSSA                     | POS                                                               | POS         | NEG            | POS         | NEG          | POS                                   | POS        | POS           | NEG          | NEG        | NEG         | POS                      | AMB           | POS            | AMB                        | POS         | NEG                         | POS                      | POS                     | POS                                                             | POS          | NEG          | NEG |     |
| 170973     | CC0097                    | CC97-MSSA                     | POS                                                               | POS         | NEG            | POS         | NEG          | POS                                   | POS        | POS           | NEG          | NEG        | NEG         | POS                      | AMB           | POS            | AMB                        | POS         | NEG                         | POS                      | POS                     | POS                                                             | POS          | NEG          | NEG |     |
| 207756     | CC0097                    | CC97-MSSA                     | POS                                                               | POS         | NEG            | POS         | NEG          | POS                                   | POS        | POS           | NEG          | NEG        | NEG         | POS                      | AMB           | POS            | POS                        | AMB         | POS                         | NEG                      | POS                     | POS                                                             | POS          | POS          | NEG | NEG |
| 206711     | CC0097                    | CC97-MSSA                     | POS                                                               | POS         | NEG            | POS         | NEG          | POS                                   | POS        | POS           | NEG          | NEG        | NEG         | POS                      | AMB           | POS            | POS                        | AMB         | POS                         | NEG                      | POS                     | POS                                                             | POS          | POS          | NEG | NEG |
| 275189     | CC0097                    | CC97-MSSA(ccrAA)              | POS                                                               | POS         | NEG            | POS         | NEG          | POS                                   | POS        | POS           | NEG          | NEG        | NEG         | POS                      | AMB           | POS            | AMB                        | POS         | NEG                         | POS                      | POS                     | POS                                                             | POS          | NEG          | NEG |     |
| 275188     | CC0097                    | CC97-MSSA(ccrAA)              | POS                                                               | POS         | NEG            | POS         | NEG          | POS                                   | POS        | POS           | NEG          | NEG        | NEG         | POS                      | AMB           | POS            | AMB                        | POS         | NEG                         | POS                      | POS                     | POS                                                             | POS          | NEG          | NEG |     |
| 118320     | CC0130                    | CC130-MSSA (huF-PS3huM+)      | NEG                                                               | NEG         | NEG            | NEG         | NEG          | POS                                   | POS        | CC130-MSSA    | NEG          | NEG        | NEG         | NEG                      | POS           | AMB            | POS                        | POS         | NEG                         | POS                      | POS                     | POS                                                             | POS          | NEG          | NEG |     |
| 203236     | CC0130                    | CC130-MRS4-XI                 | POS                                                               | POS         | NEG            | AMB         | NEG          | NEG                                   | POS        | POS           | NEG          | NEG        | NEG         | POS                      | POS           | POS            | POS                        | AMB         | POS                         | NEG                      | AMB                     | POS                                                             | POS          | POS          | POS |     |
| 204204     | CC0130                    | CC130-MRS4-XI                 | POS                                                               | POS         | NEG            | AMB         | NEG          | NEG                                   | POS        | POS           | NEG          | NEG        | NEG         | POS                      | POS           | POS            | POS                        | AMB         | POS                         | NEG                      | AMB                     | POS                                                             | POS          | POS          | POS |     |
| 289122     | CC0130                    | CC130-MRS4-XI                 | POS                                                               | POS         | NEG            | NEG         | NEG          | POS                                   | POS        | POS           | NEG          | NEG        | NEG         | AMB                      | POS           | POS            | POS                        | AMB         | POS                         | NEG                      | AMB                     | POS                                                             | POS          | POS          | POS |     |
| 225779     | CC0130                    | CC130-MRS4-XI                 | POS                                                               | POS         | NEG            | NEG         | NEG          | POS                                   | POS        | POS           | NEG          | NEG        | NEG         | AMB                      | POS           | POS            | POS                        | AMB         | POS                         | NEG                      | NEG                     | POS                                                             | POS          | POS          | POS |     |
| 225780     | CC0130                    | CC130-MRS4-XI                 | POS                                                               | POS         | NEG            | NEG         | NEG          | POS                                   | POS        | POS           | NEG          | NEG        | NEG         | AMB                      | POS           | POS            | POS                        | AMB         | POS                         | NEG                      | NEG                     | POS                                                             | POS          | POS          | POS |     |
| 170959     | CC0130                    | CC130-MRS4-XI                 | POS                                                               | POS         | NEG            | NEG         | NEG          | POS                                   | POS        | POS           | NEG          | NEG        | NEG         | AMB                      | POS           | POS            | POS                        | AMB         | POS                         | NEG                      | POS                     | POS                                                             | POS          | POS          | POS |     |
| 170929     | CC0130                    | CC130-MRS4-XI                 | POS                                                               | POS         | NEG            | NEG         | NEG          | POS                                   | POS        | POS           | NEG          | NEG        | NEG         | POS                      | AMB           | POS            | AMB                        | POS         | POS                         | NEG                      | POS                     | POS                                                             | POS          | POS          | POS |     |
| 118324     | CC0133                    | CC133-MSSA                    | POS                                                               | POS         | NEG            | NEG         | NEG          | POS                                   | POS        | POS           | NEG          | NEG        | NEG         | POS                      | AMB           | POS            | POS                        | POS         | NEG                         | POS                      | POS                     | POS                                                             | POS          | POS          | POS |     |
| 207761     | CC0133                    | CC133-MSSA                    | POS                                                               | POS         | NEG            | NEG         | NEG          | POS                                   | POS        | POS           | NEG          | NEG        | NEG         | POS                      | AMB           | POS            | POS                        | POS         | NEG                         | POS                      | POS                     | POS                                                             | POS          |              |     |     |
